# Supplementary material for: Netrin signaling mediates survival of dormant epithelial ovarian cancer cells
Source: eLife journal article supplement (doi:10.7554/elife.91766), 2023-11-30

Fig.1A

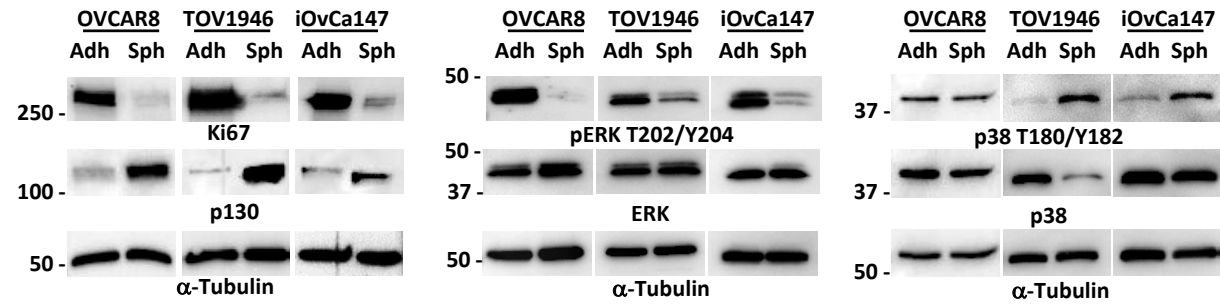

**Fig.1A**

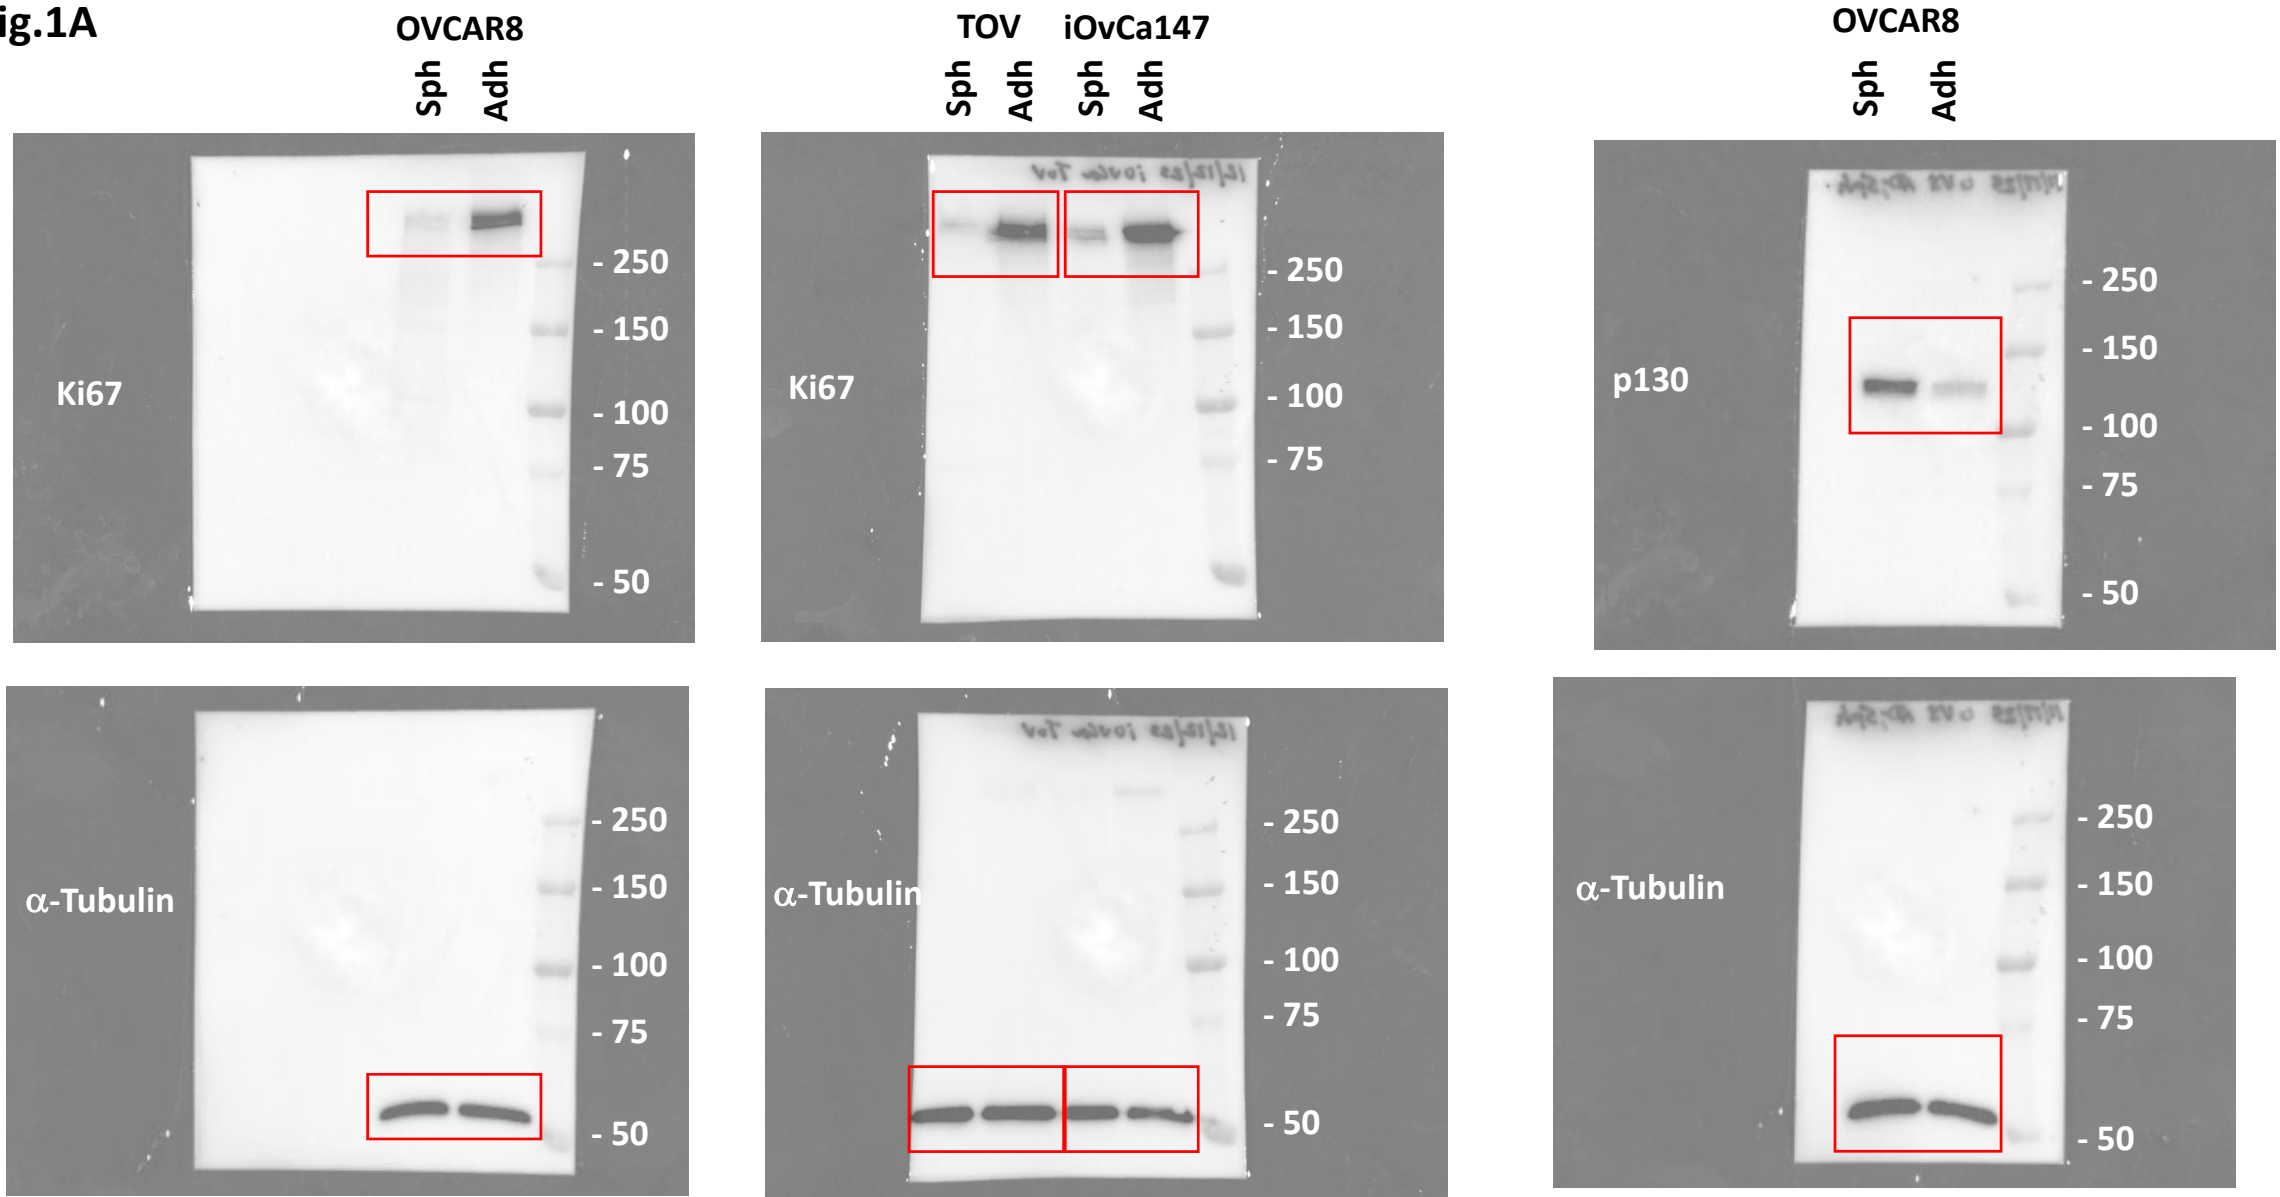

**Fig.1A**

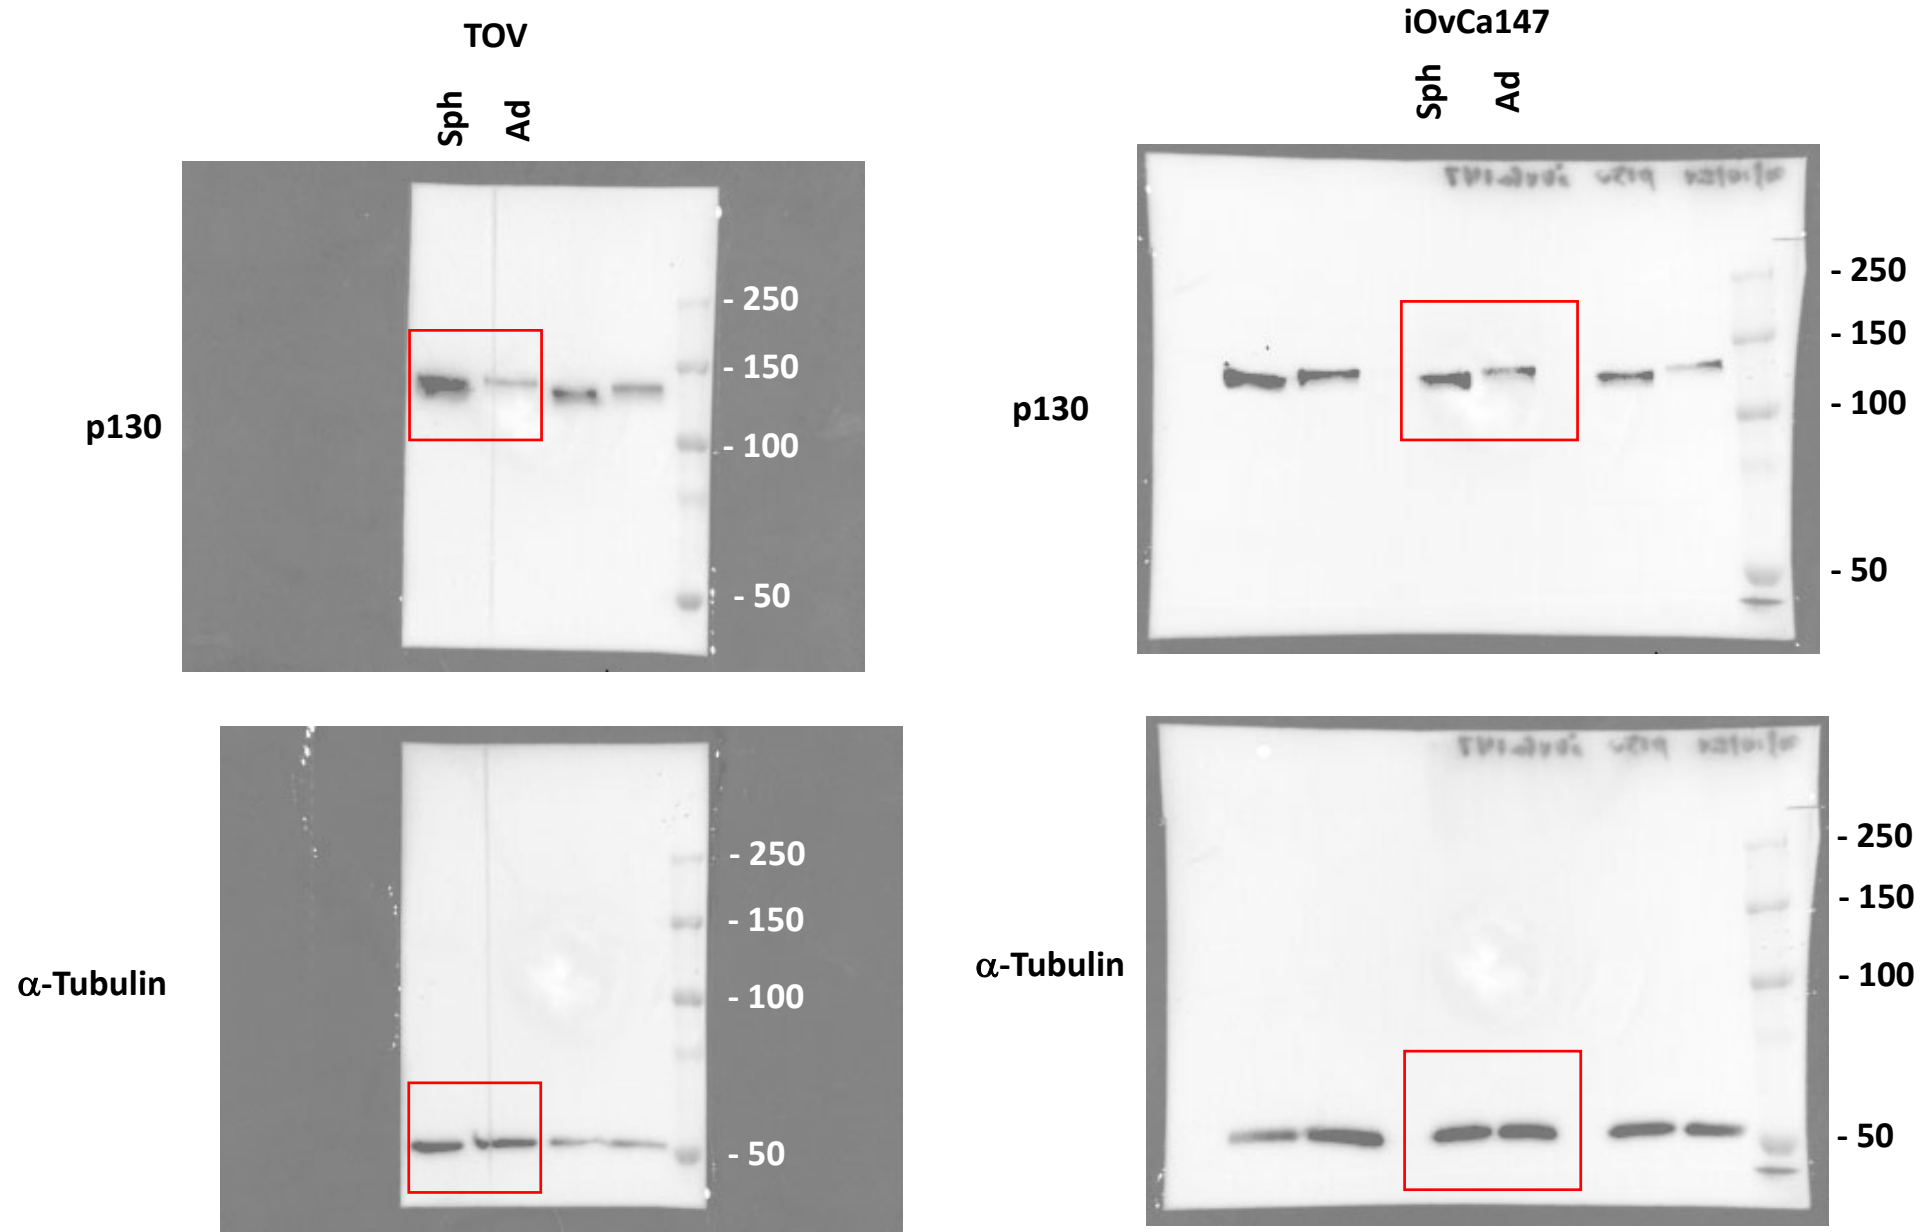

**Fig.1A**

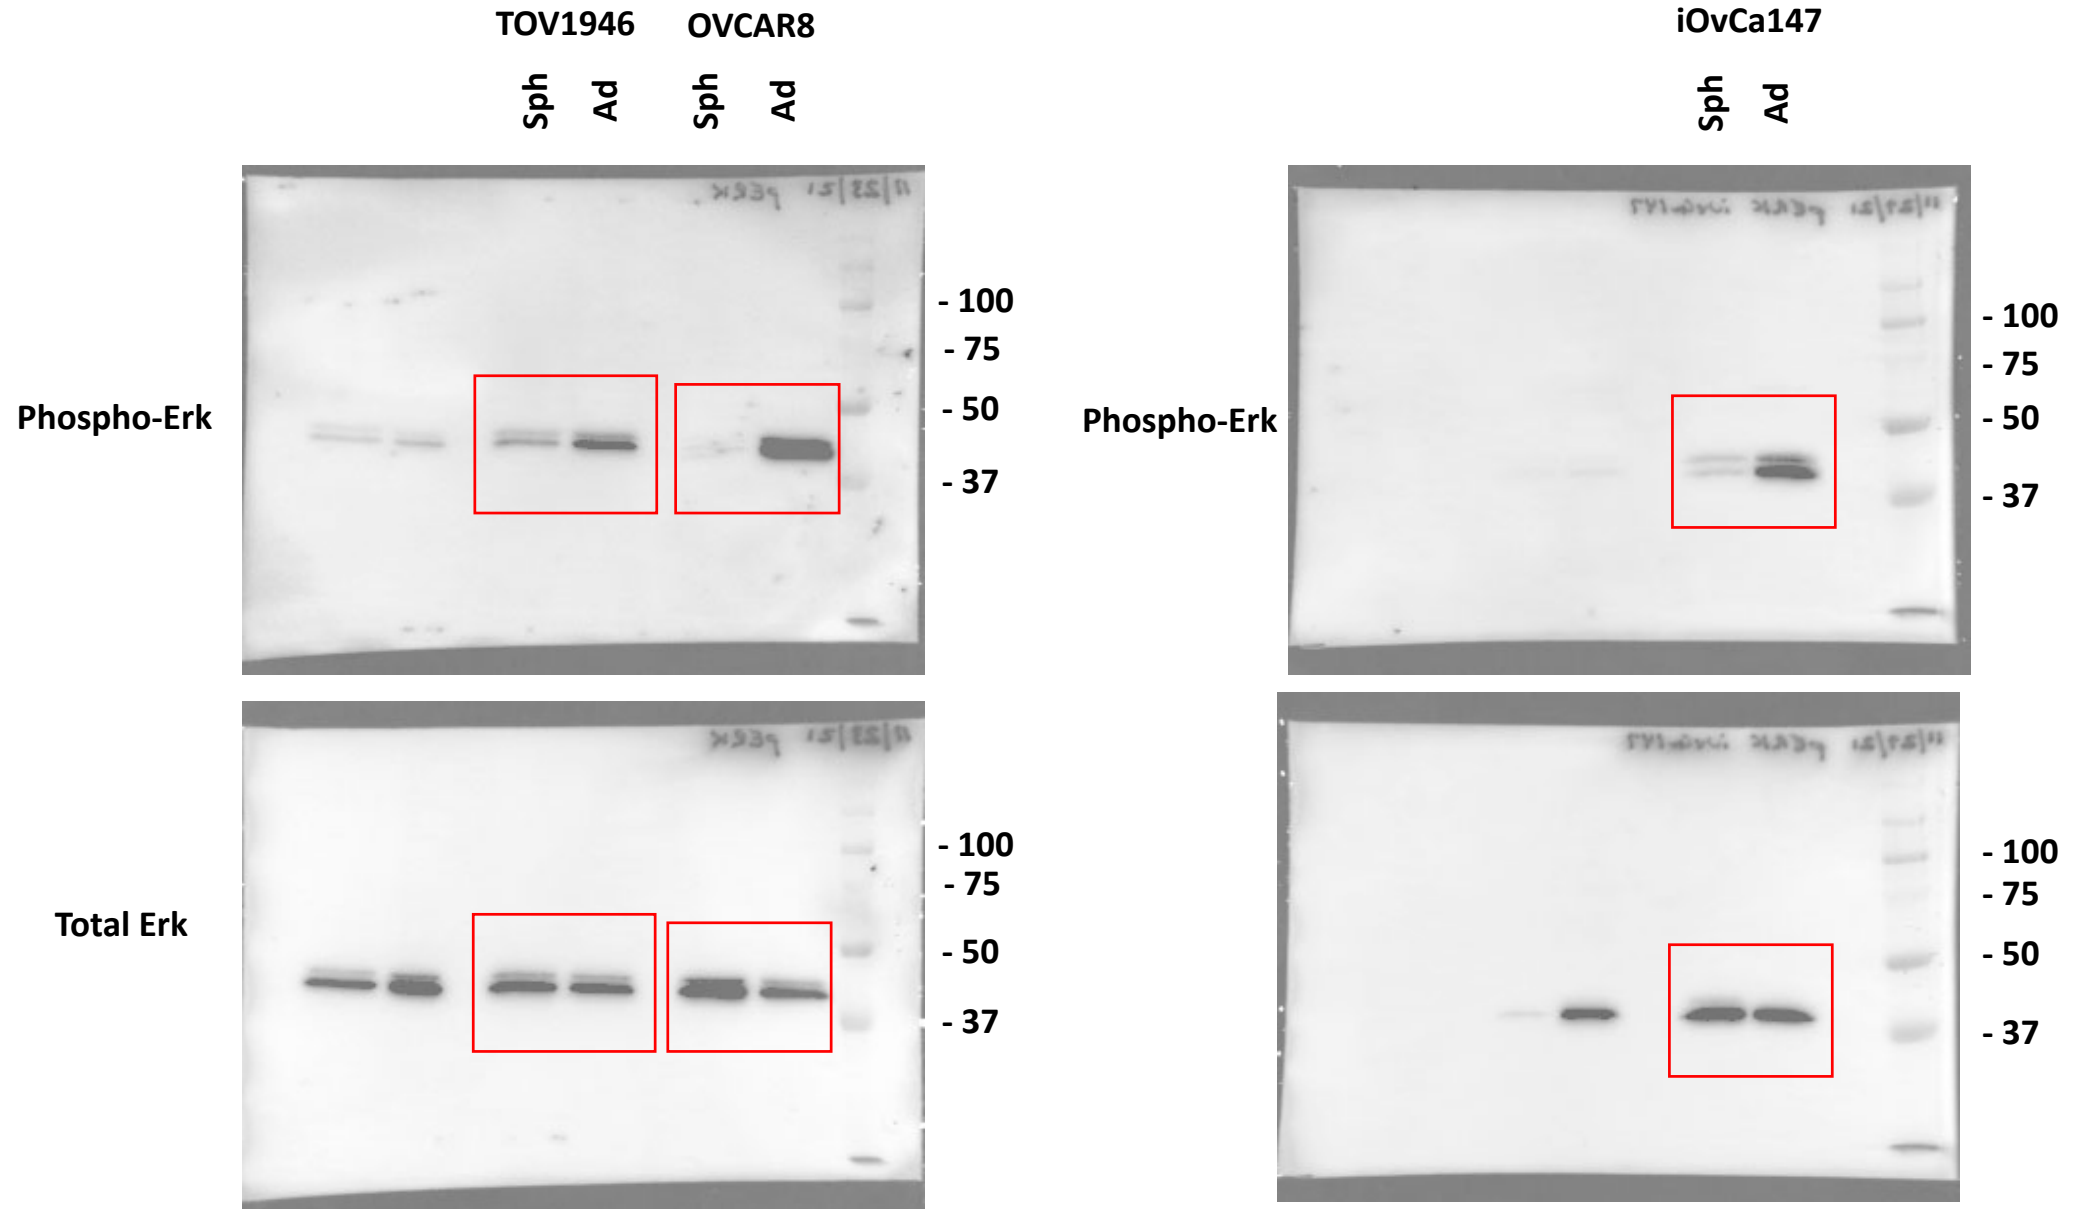

**Fig.1A**

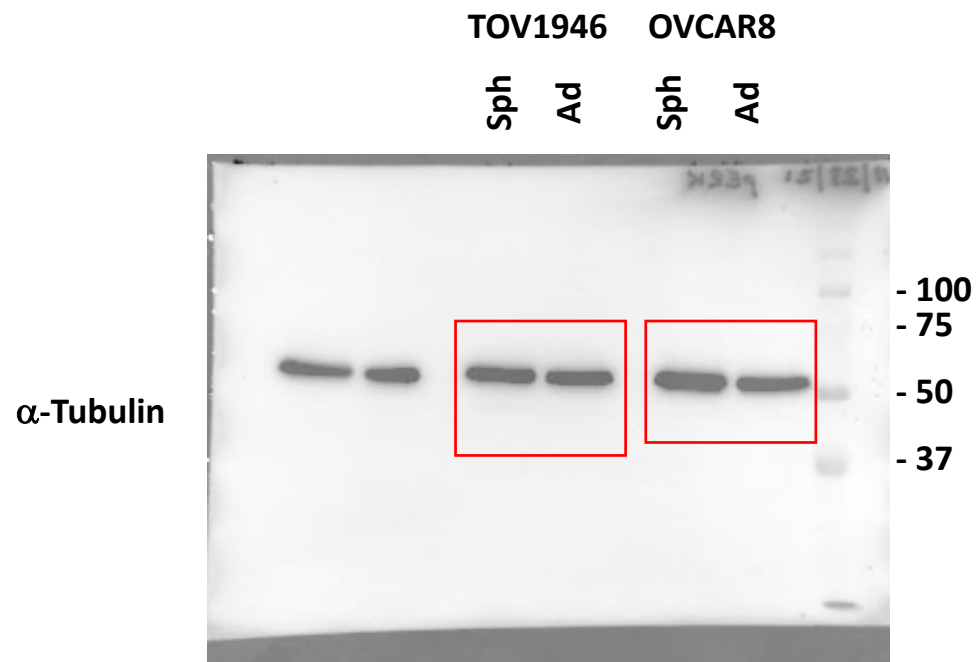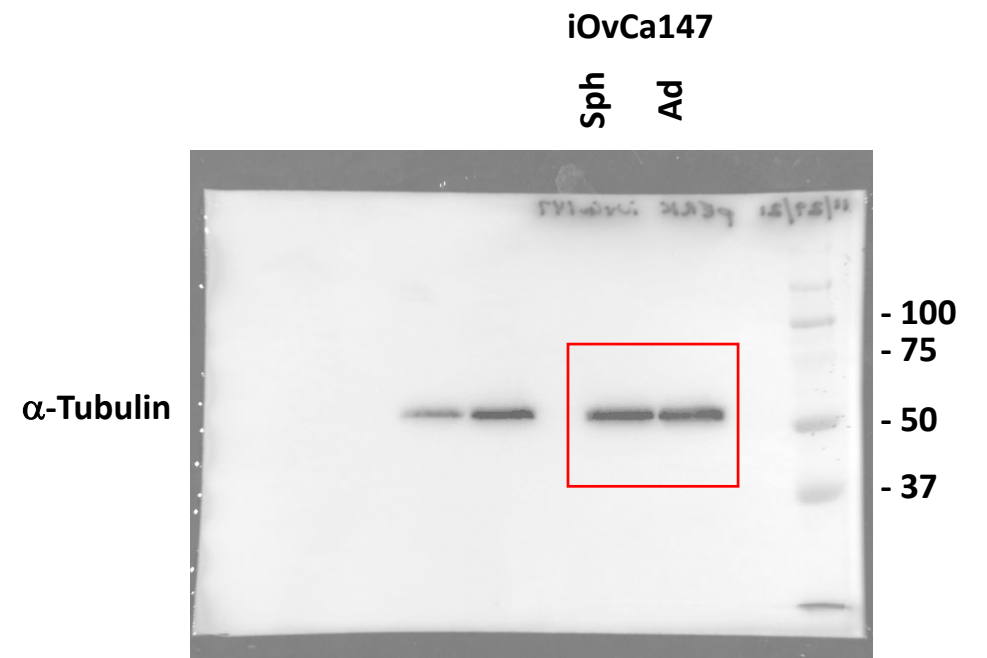

**Fig.1A**

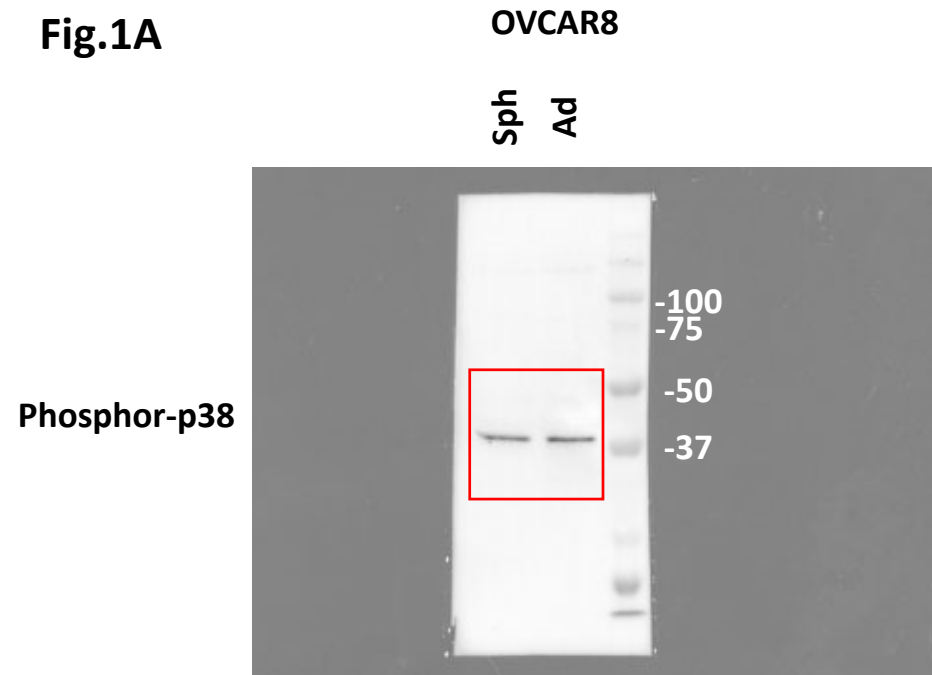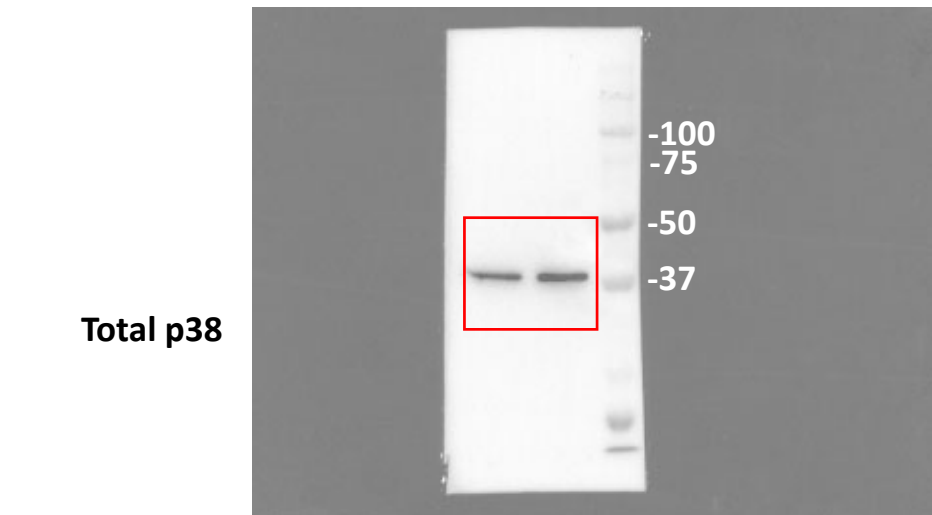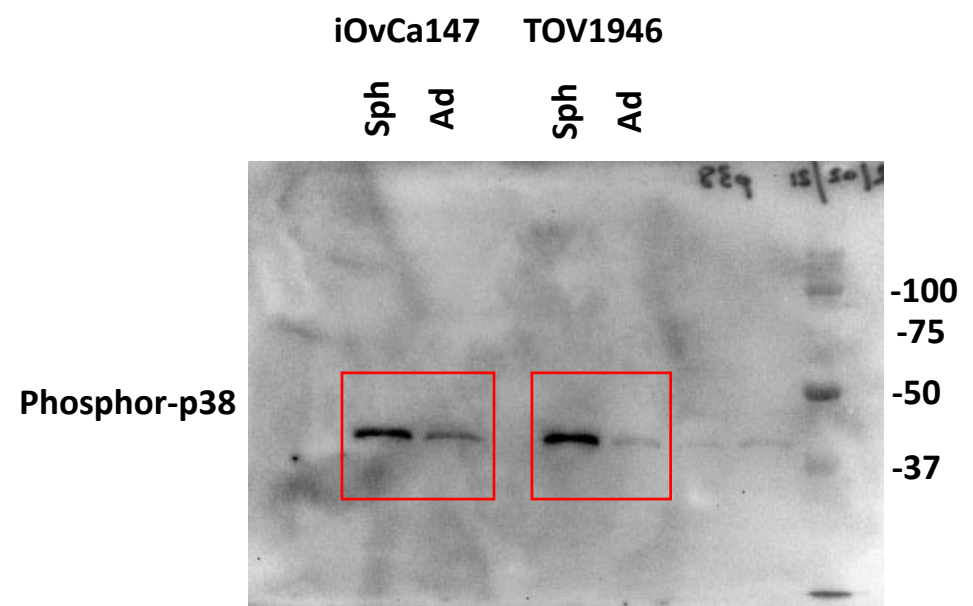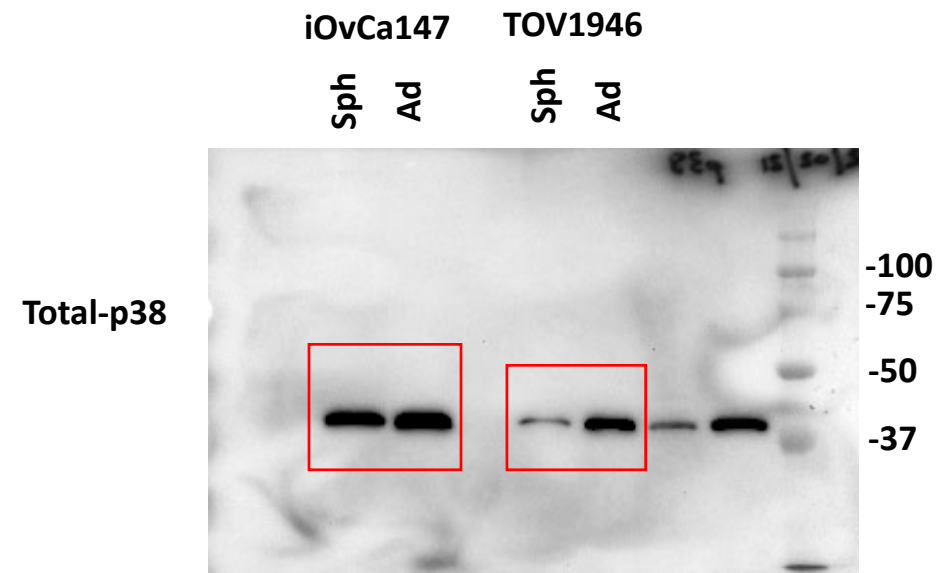

Fig.1A

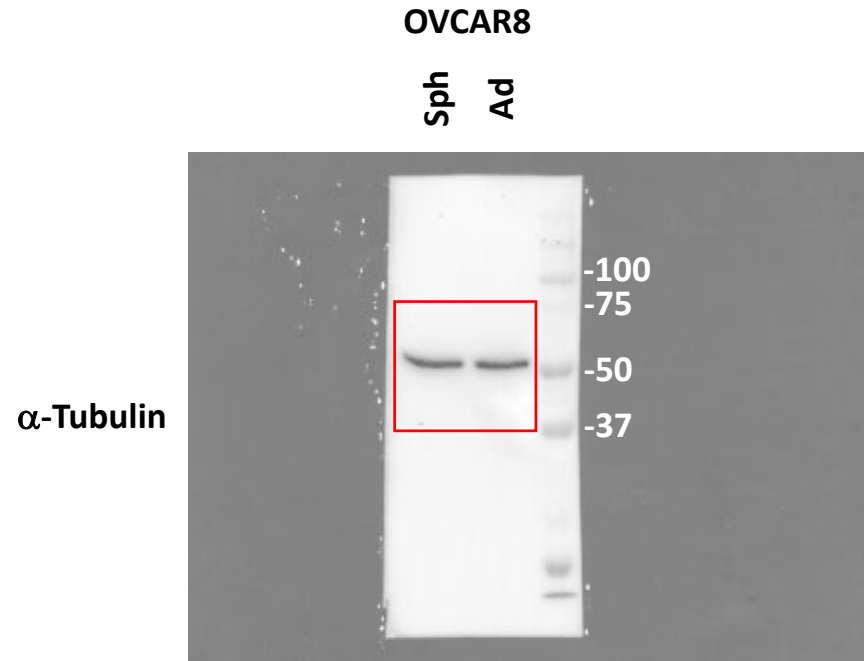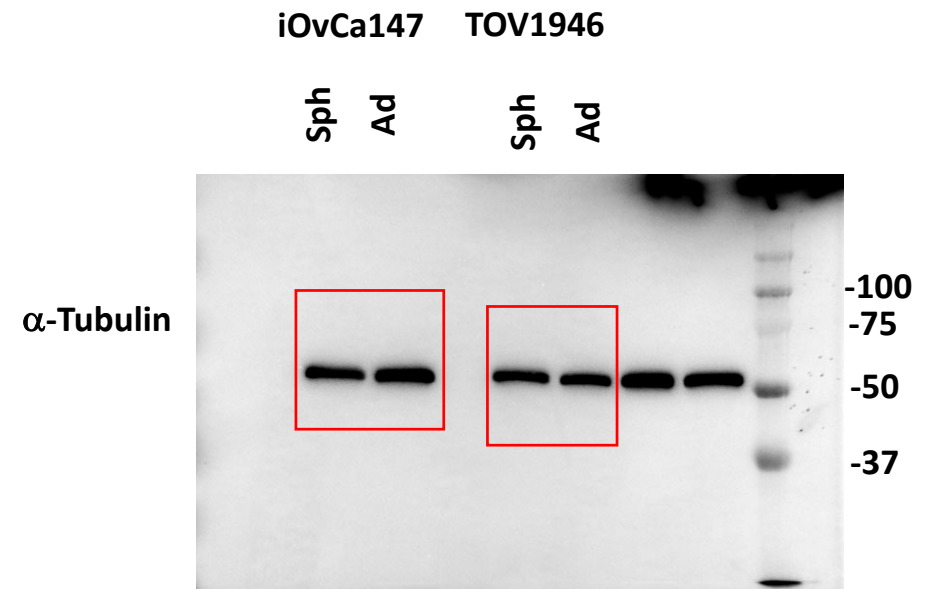

Supplement: fig1-data2 [file elife-91766-fig1-data2-v1.pdf]
