# Supplementary material for: Netrin signaling mediates survival of dormant epithelial ovarian cancer cells
Source: eLife journal article supplement (doi:10.7554/elife.91766), 2023-11-30

DYRK1A -

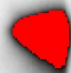

DYRK1A -



11

11

20180614 - DYADIN D4 KINASE WT K04 K05 K06

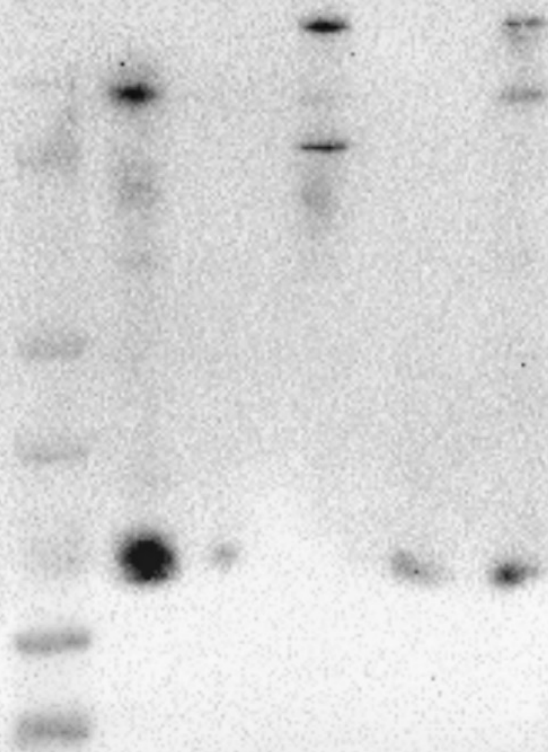

20180614 - DYADIN D4 KINASE WT K04 K05 K06

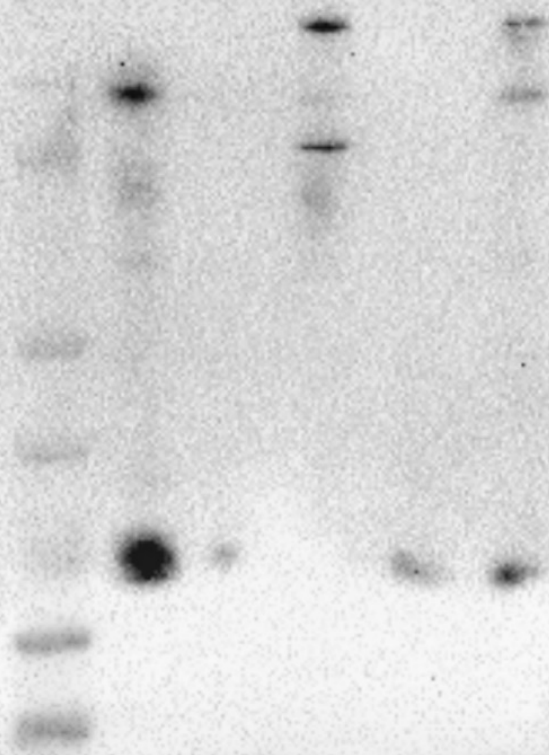

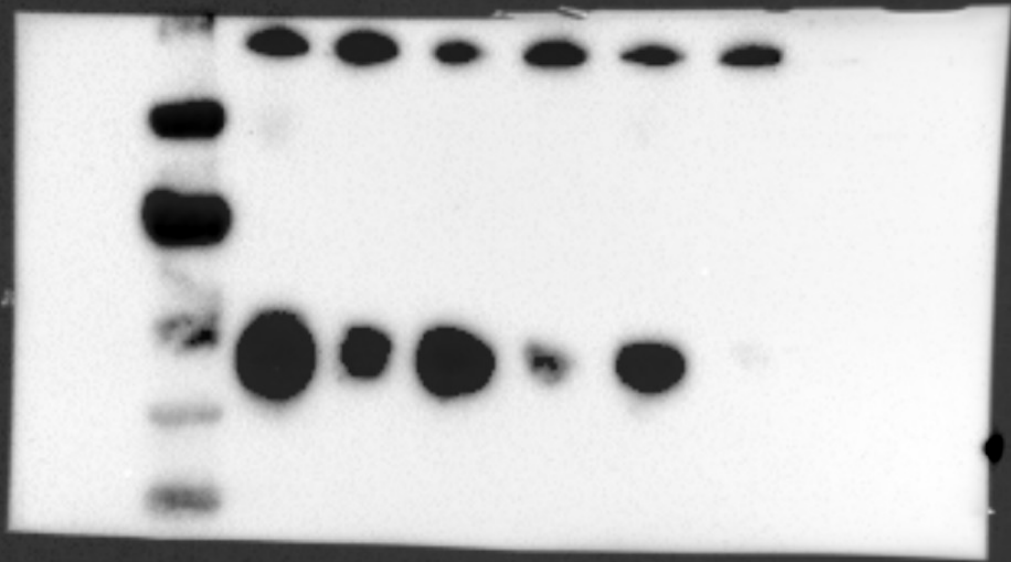



Supplement: fig2-figsupp1-data2 [file elife-91766-fig2-figsupp1-data2-v1.pdf]
