# Supplementary material for: Netrin signaling mediates survival of dormant epithelial ovarian cancer cells
Source: eLife journal article supplement (doi:10.7554/elife.91766), 2023-11-30

Fig. 5D

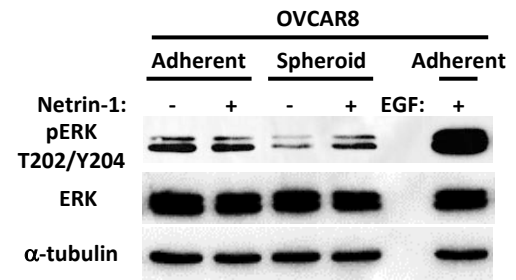

Fig. 5D

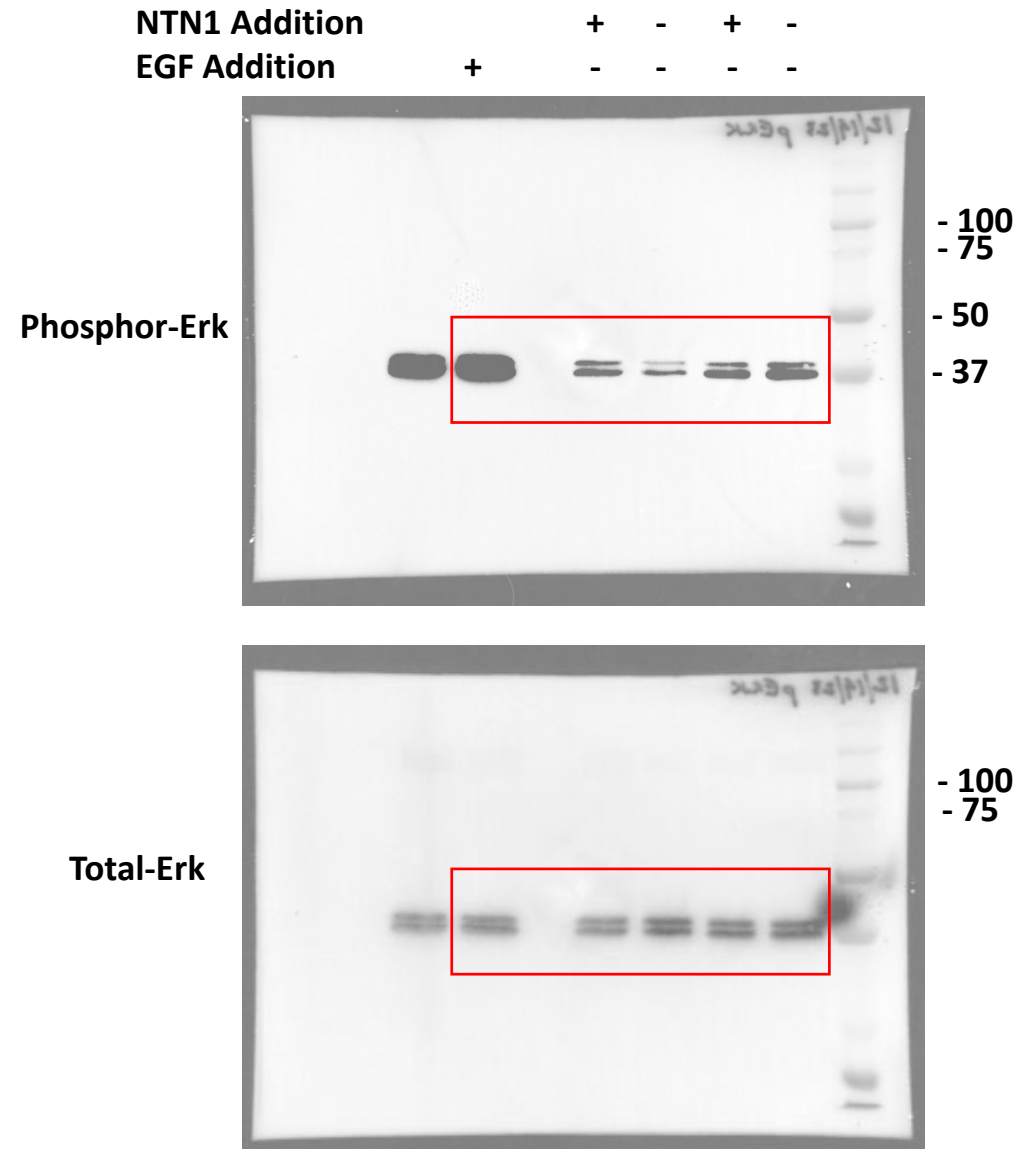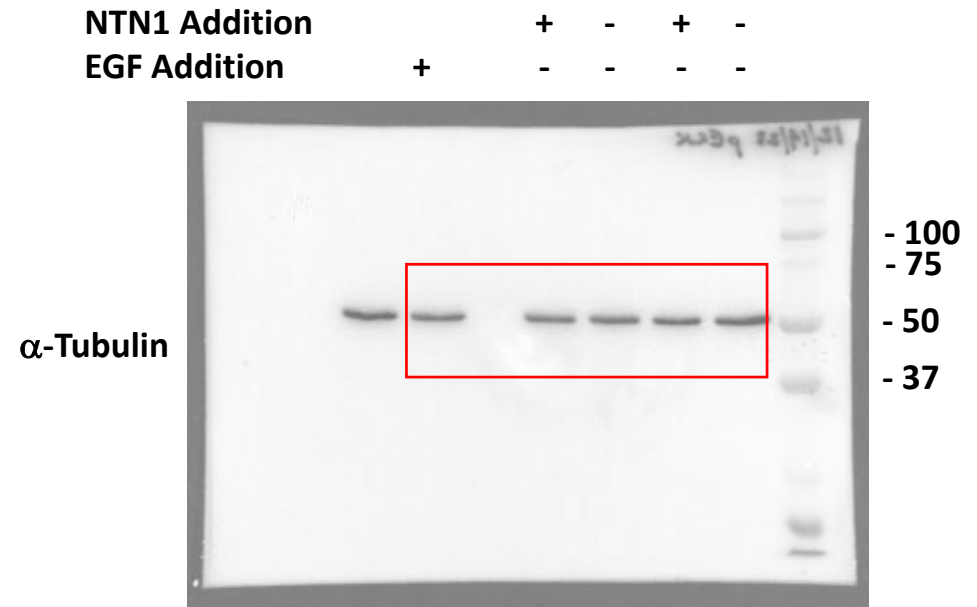

Supplement: fig5-data5 [file elife-91766-fig5-data5-v1.pdf]
