# Supplementary material for: Netrin signaling mediates survival of dormant epithelial ovarian cancer cells
Source: eLife journal article supplement (doi:10.7554/elife.91766), 2023-11-30

**Fig. 5E**

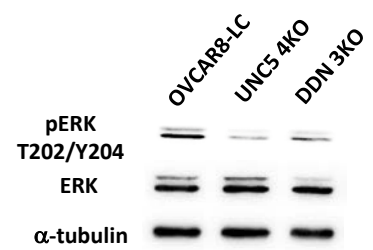

Fig. 5E

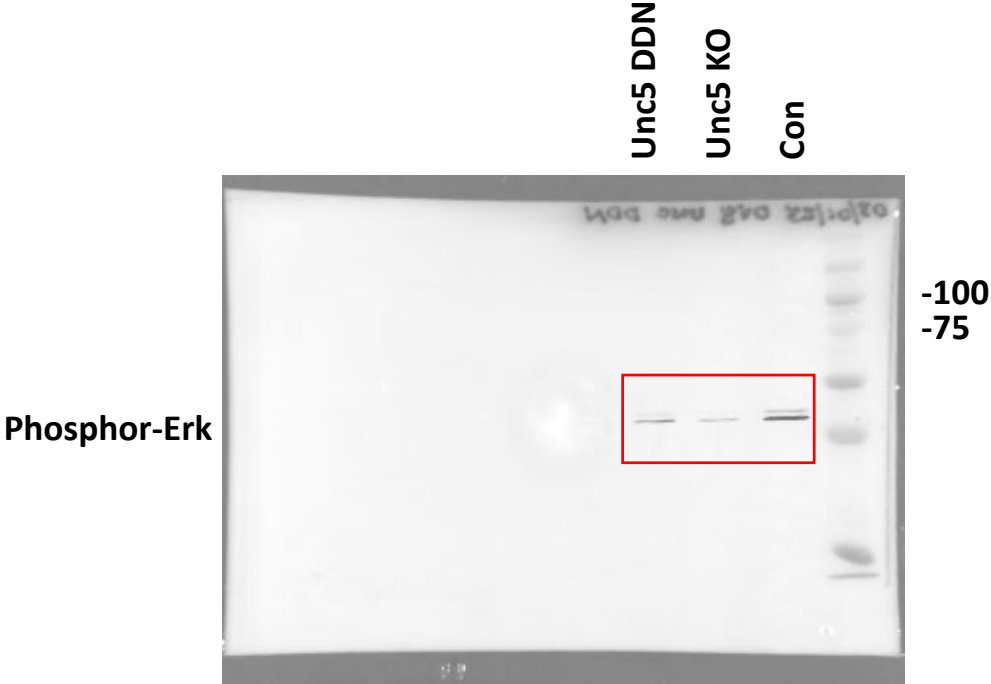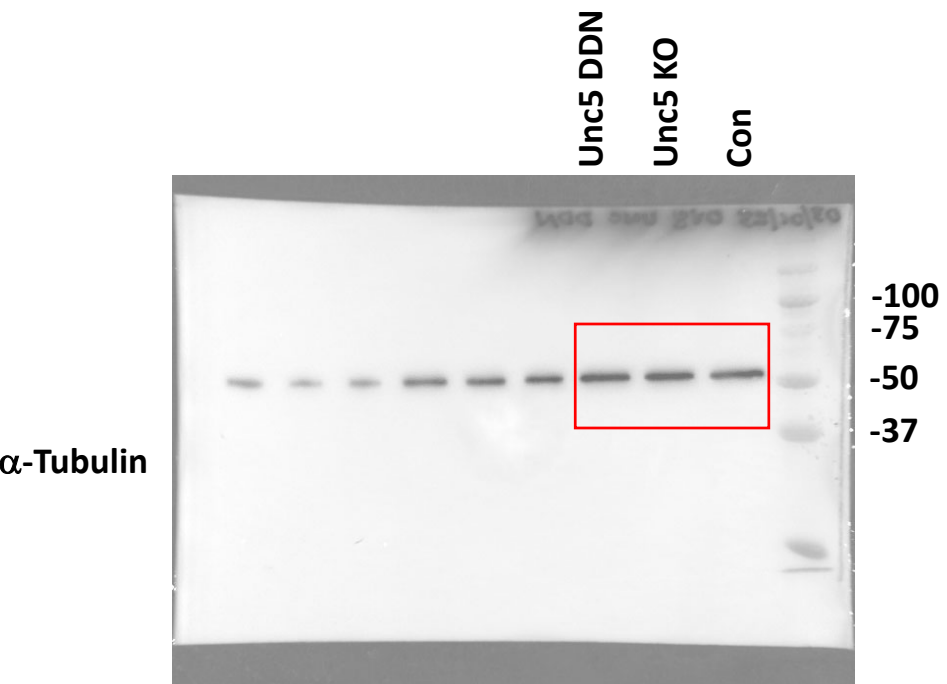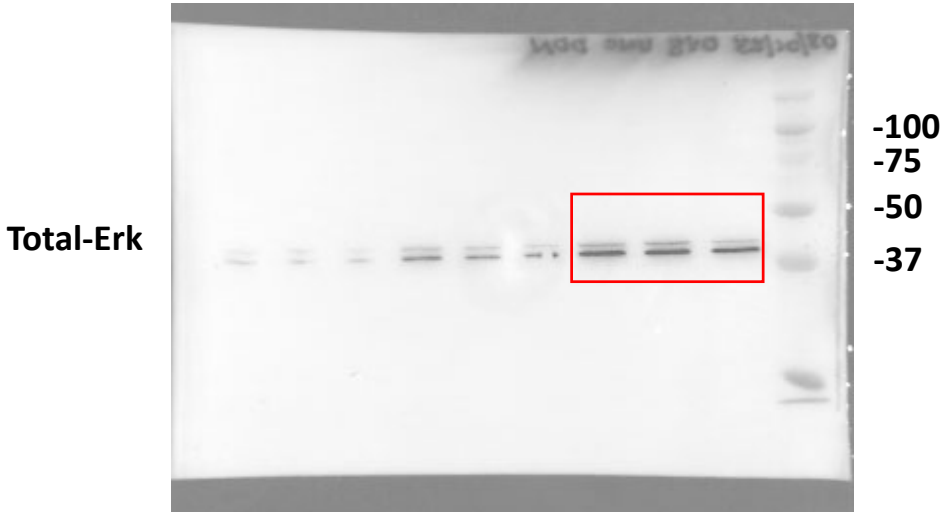

Supplement: fig5-data7 [file elife-91766-fig5-data7-v1.pdf]
