# Supplementary material for: Netrin signaling mediates survival of dormant epithelial ovarian cancer cells
Source: eLife journal article supplement (doi:10.7554/elife.91766), 2023-11-30

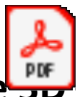

**Figure 5B – Figure Supplement 1**  
Fig.1A Source Data 2.pdf

Time in  
suspension:

72h 48h 24h 6h 4h 2h  
Unc5 KO Con Unc5 KO Con

Phospho-DAPK1

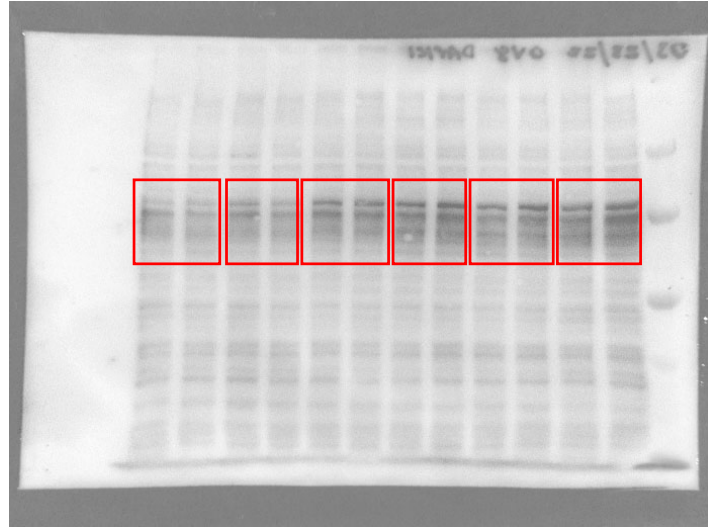

-250  
-150  
-100

Total DAPK1

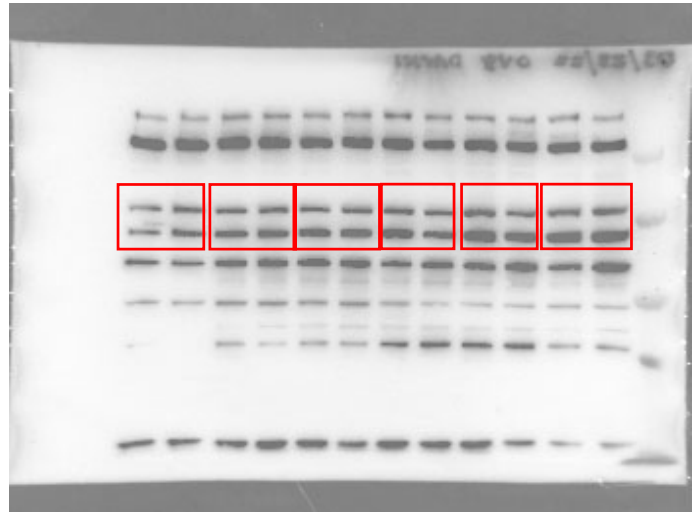

-250  
-150  
-100

Figure 5D – Figure Supplement 1

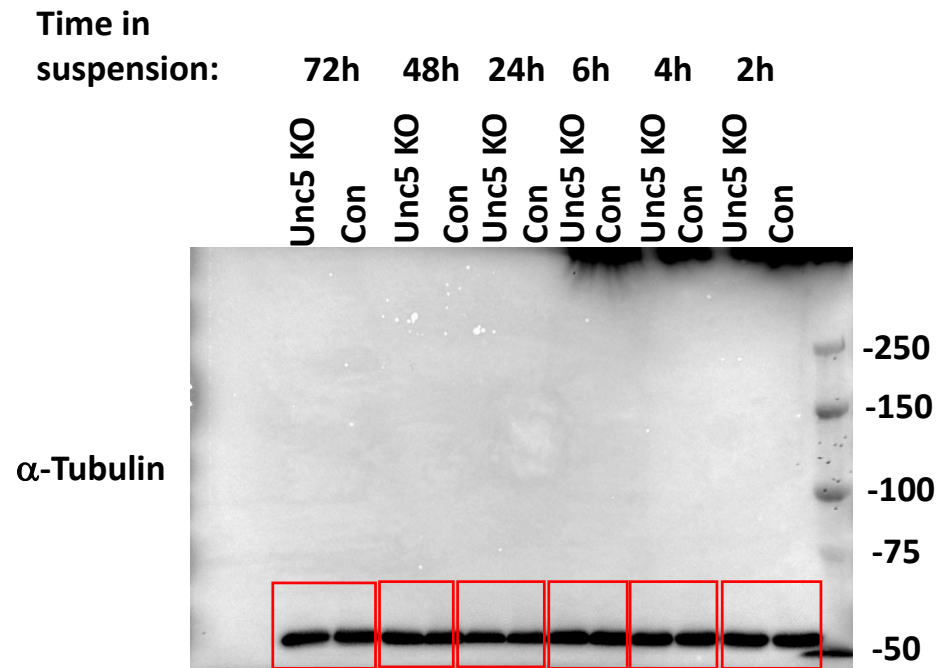

Supplement: fig5-figsupp1-data3 [file elife-91766-fig5-figsupp1-data3-v1.pdf]
