# Supplementary material for: Netrin signaling mediates survival of dormant epithelial ovarian cancer cells
Source: eLife journal article supplement (doi:10.7554/elife.91766), 2023-11-30

Fig.7B

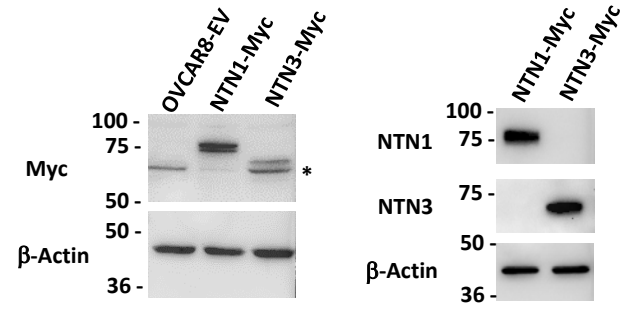

Fig.7B

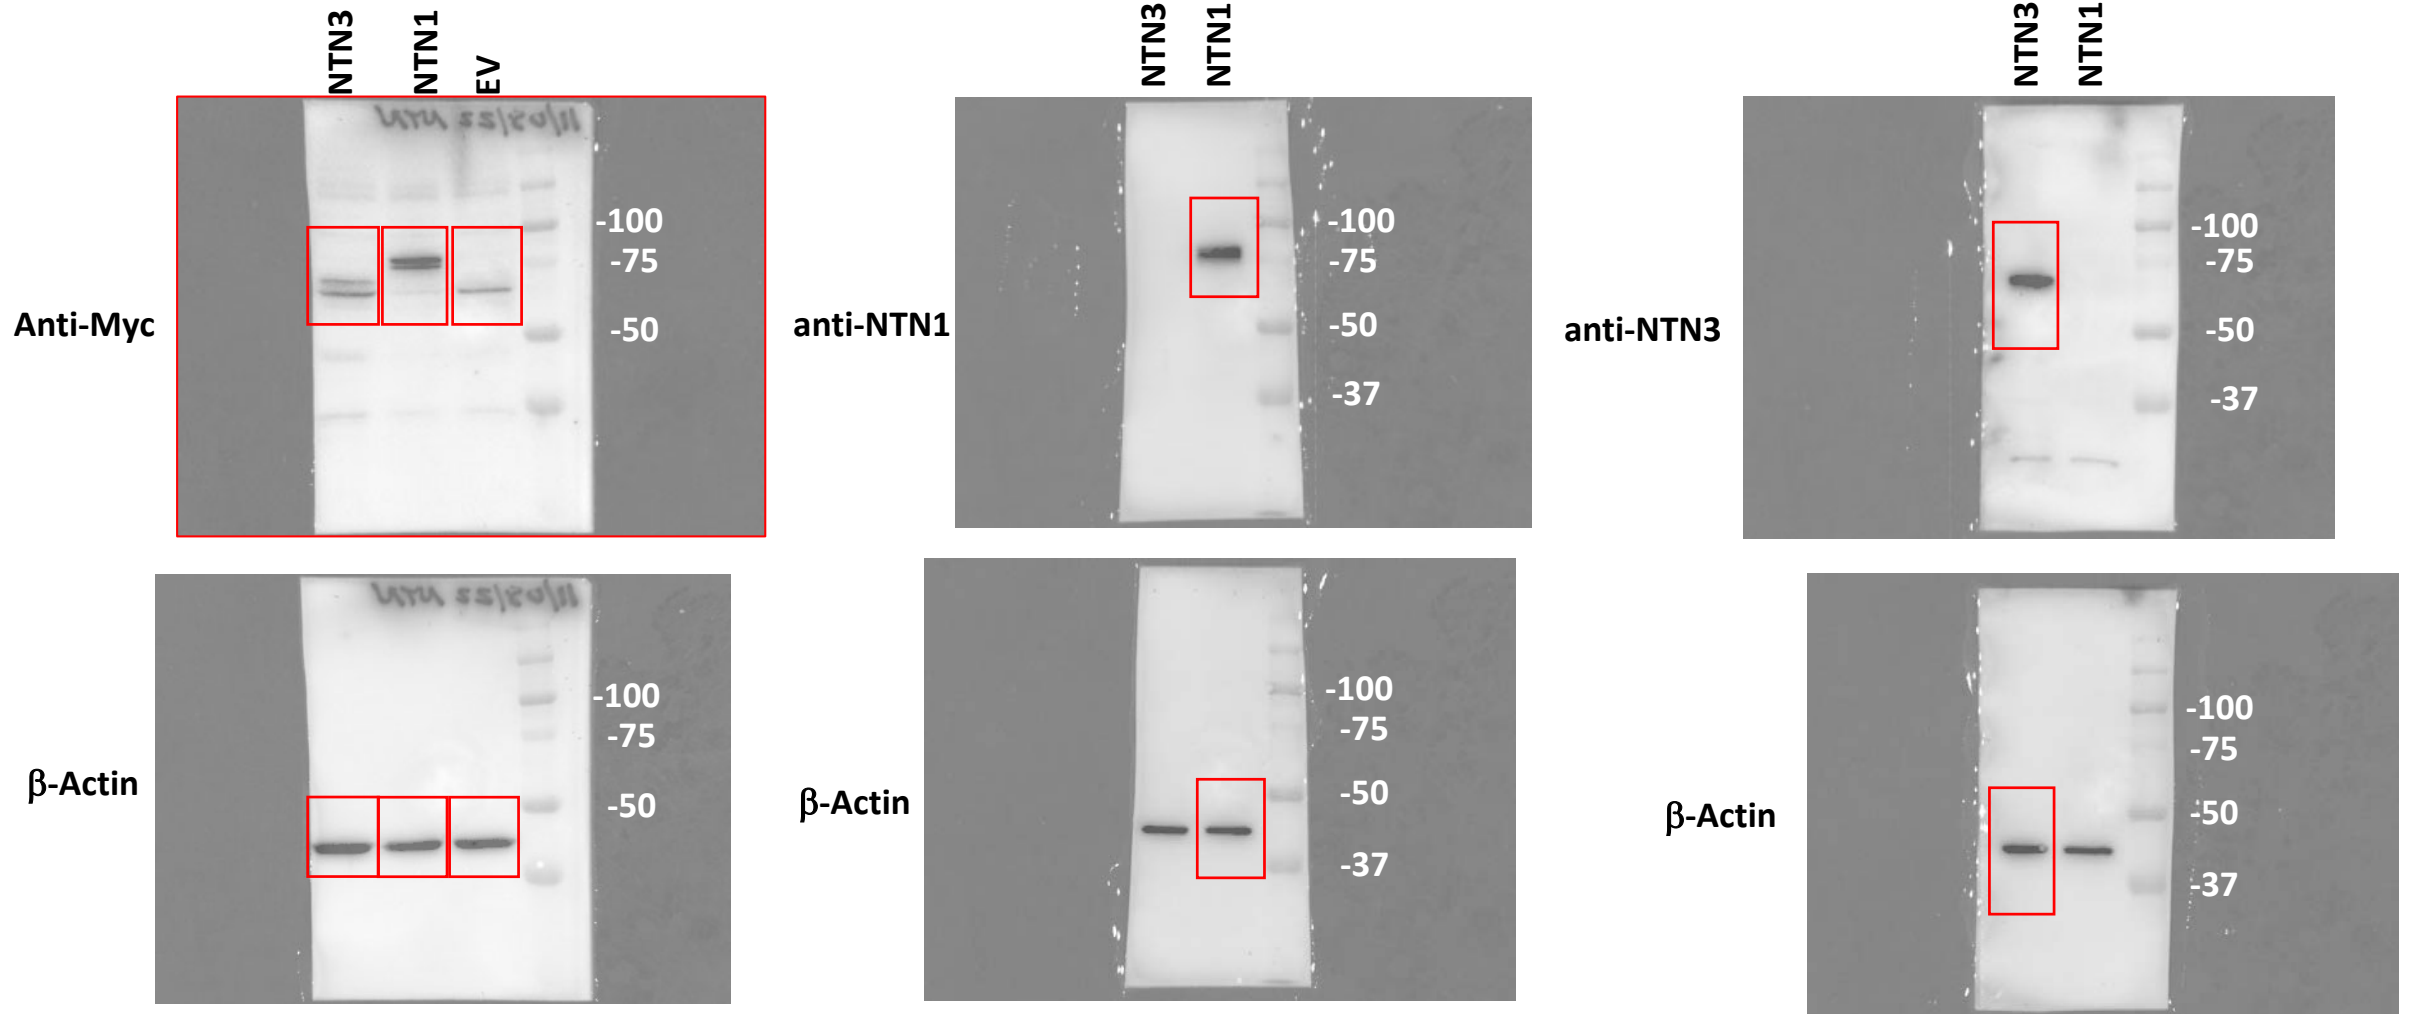

Supplement: fig7-data2 [file elife-91766-fig7-data2-v1.pdf]
