# Supplementary material for: Netrin signaling mediates survival of dormant epithelial ovarian cancer cells
Source: eLife. 2024 Jul 18;12:RP91766. doi: 10.7554/eLife.91766 (PMC11257678; doi:10.7554/eLife.91766)
Supplement: Figure 1—figure supplement 1—source data 1. [file elife-91766-fig1-figsupp1-data1.xlsx]

## Sheet: Sheet1
Figure 1-Figure Supplement 1-Source Data 1- raw data for panel D								iOvCa147	OVCAR8	TOV1946			iOvCa147	OVCAR8
							STK11	-0.057495	-0.004148	-2.3601			60.638	67.8364
							NUAK1	-2.30447	0.722918	0.42161			78.9136	139.298																	-0.057495	60.638		1.88801	87.2293								-0.057495	60.638			8.61697	87.5449
							NUAK2	-0.154541	-0.810685				83.0433	59.8007																	-2.30447	78.9136		6.4255	4.86186								-2.30447	78.9136			4.37006	4.18485
							SIK1	0.594941	0.117816				45.2955	58.764																	-0.154541	83.0433		0.00330965	25.343								-0.154541	83.0433			0.054085	35.0085
							SIK2	0.204632	-0.101765				39.5761	95.408																	0.594941	45.2955		0.0863366	26								0.594941	45.2955			3.88807	68
							SNRK	-0.094986	-0.647895				39.0958	108.079																	0.204632	39.5761		55.4512	16699								0.204632	39.5761			4765.2	83340.6
							MARK1	-0.212092	-0.551557				109.553	103.672																	-0.094986	39.0958											-0.094986	39.0958
							MARK2	-1.05282	-0.474157				116.88	101.606																	-0.212092	109.553											-0.212092	109.553
							MARK3	0.08861	0.651882				91.514	81.1475																	-1.05282	116.88		1.28588									-1.05282	116.88		F-value=	0.0296036	Pearson=	0.232562
							MARK4	-0.278246	-1.21154				82.1183	112																	0.08861	91.514											0.08861	91.514				p=	0.052765
							BRSK1	0.004173	-0.336803				85.9972	94.0077																	-0.278246	82.1183											-0.278246	82.1183
							BRSK2	0.601421	-0.318532				85.5934	92.5839							-0.324444	120		0.0073073	-0.579401						0.004173	85.9972											0.004173	85.9972
							PRKAA1	1.4362	-0.772422				121.12	76.033							0.453295	107.6		0.00393527	0.381337						0.601421	85.5934											0.601421	85.5934
							PRKAA2	1.32947	-0.012498				108.728	97.2368							0.040259	113.2		0.0793589	1.05111						1.4362	121.12											1.4362	121.12
																					0.486838	132		3.44799	40						1.32947	108.728											1.32947	108.728
																					-1.3024	25		3.80946	44.1935						-0.004148	67.8364											-0.004148	67.8364
																					0.224012	89									0.722918	139.298											0.722918	139.298
							LIN9	-0.324444	0.662588				120	107							-2.06465	83.5									-0.810685	59.8007											-0.810685	59.8007
							LIN37	0.453295	-0.572878				107.6	110							-0.500908	7		0.0391981							0.117816	58.764											0.117816	58.764
							LIN52	0.040259	2.97095				113.2	83.28							1.98889	93.7									-0.101765	95.408											-0.101765	95.408
							LIN54	0.486838	1.06098				132	125							0.630602	104.6									-0.647895	108.079											-0.647895	108.079
							RBBP4	-1.3024	-2.0676				25	116							-0.421246	183									-0.551557	103.672											-0.551557	103.672
							RB1	0.224012	0.110727				89	114							0.49116	29.6									-0.474157	101.606											-0.474157	101.606
							RBL1	-2.06465	-0.293477				83.5	91.33							-0.294732	12.2									0.651882	81.1475											0.651882	81.1475
							RBL2	-0.500908	-0.661979				7	129							0.119883	114.1									-1.21154	112											-1.21154	112
							E2F4	1.98889	-0.244798				93.7	90.91							-2.81728	61									-0.336803	94.0077											-0.336803	94.0077
							E2F5	0.630602	-0.84875				104.6	27.43							1.7032	124									-0.318532	92.5839											-0.318532	92.5839
							LATS1	-0.421246	1.39769				183	176							-0.108056	105									-0.772422	76.033											-0.772422	76.033
							LATS2	0.49116	-0.769549				29.6	56.96							0.588321	84.4									-0.012498	97.2368											-0.012498	97.2368
							DYRK1A	-0.294732	0.092632				12.2	62.14							-1.4346	15																					-0.324444	120
							DYRK1B	0.119883	0.256635				114.1	102							0.116059	42																					0.453295	107.6
							CDKN2A	-2.81728	-0.118373				61	120							0.595772	51.9																					0.040259	113.2
							CDKN2B	1.7032	0.226977				124	108							0.662588	107																					0.486838	132
							CDKN2C	-0.108056	0.065349				105	71.13							-0.572878	110																					-1.3024	25
							CDKN2D	0.588321	0.66236				84.4	79.89							2.97095	83.28																					0.224012	89
							CDKN1A	-1.4346	1.33354				15	88.95							1.06098	125																					-2.06465	83.5
							CDKN1B	0.116059	1.27377				42	113							-2.0676	116																					-0.500908	7
							CDKN1C	0.595772	-0.125599				51.9	13.62							0.110727	114																					1.98889	93.7
																					-0.293477	91.33																					0.630602	104.6
																					-0.661979	129																					-0.421246	183
																					-0.244798	90.91																					0.49116	29.6
																					-0.84875	27.43																					-0.294732	12.2
																					1.39769	176																					0.119883	114.1
																					-0.769549	56.96																					-2.81728	61
																					0.092632	62.14																					1.7032	124
																					0.256635	102																					-0.108056	105
																					-0.118373	120																					0.588321	84.4
																					0.226977	108																					-1.4346	15
																					0.065349	71.13																					0.116059	42
																					0.66236	79.89																					0.595772	51.9
																					1.33354	88.95																					0.662588	107
																					1.27377	113																					-0.572878	110
																					-0.125599	13.62																					2.97095	83.28
																																											1.06098	125
																																											-2.0676	116
																																											0.110727	114
																																											-0.293477	91.33
																																											-0.661979	129
																																											-0.244798	90.91
																																											-0.84875	27.43
																																											1.39769	176
																																											-0.769549	56.96
																																											0.092632	62.14
																																											0.256635	102
																																											-0.118373	120
																																											0.226977	108
																																											0.065349	71.13
																																											0.66236	79.89
																																											1.33354	88.95
																																											1.27377	113
																																											-0.125599	13.62

## Sheet: Sheet2
Month	Sales
1	3100
2	4500
3	4400
4	5400
5	7500
6	8100
		11000
