# Supplementary material for: Netrin signaling mediates survival of dormant epithelial ovarian cancer cells
Source: eLife. 2024 Jul 18;12:RP91766. doi: 10.7554/eLife.91766 (PMC11257678; doi:10.7554/eLife.91766)
Supplement: Figure 2—figure supplement 1—source data 3. [file elife-91766-fig2-figsupp1-data3.xlsx]

## Sheet: Crystal Violet
Con 24h				Dyrk1A 24h				Con 48h				Dyrk1A 48h				Con 96h				Dyrk1A 96h
0.0551572	0.968492	0.73031	1.01301		0.566853	0.578705	0.50275		0.96357	1.06513	0.979518		0.486835	0.385434	0.376093		0.775781	0.873908	0.856878		0.230919	0.235006	0.198706
0.0555816	0.97264	0.763281	1.02315		0.607499	0.597656	0.554025		0.94394	1.04625	0.984695		0.478299	0.371268	0.383836		0.789011	0.87295	0.852692		0.226283	0.239989	0.202735
0.0565237	1.01775	0.783658	1.01892		0.597947	0.613663	0.49944		0.913269	1.02046	0.976272		0.473563	0.377376	0.376398		0.780706	0.87349	0.871298		0.21839	0.232952	0.197154
0.0557542
Average	0.986293	0.759083	1.01836		0.590766	0.596674	0.518738		0.94026	1.04395	0.980162		0.479566	0.378026	0.378776		0.781833	0.873449	0.860289		0.225197	0.235982	0.199532
	0.930539	0.703329	0.962608		0.535012	0.54092	0.462984		0.884506	0.988193	0.924407		0.423812	0.322272	0.323022		0.726078	0.817695	0.804535		0.169443	0.180228	0.143778
Normalize	1	0.755829	1.03446		0.574948	0.581298	0.497544		0.95053	1.06196	0.99341		0.455447	0.346328	0.347134		0.780277	0.878732	0.86459		0.182091	0.193681	0.15451

## Sheet: CellTiter Glo
Control 24h				Dyrk1A 24h				Control 48h				Dyrk1A 48h				Control 96h				Dyrk1A 96h
	26627	25361	24916		25807	30241	27360		22031	20914	26730		8144	4830	6933		14293	14504	19287		2868	3462	2454
	24133	24901	27296		25222	27947	28395		23120	23095	25415		8316	4751	6038		14342	14876	20945		2817	3311	1931
	33056	24983	28889		29224	27194	25324		23303	23545	24930		7892	4487	5429		13636	14449	18953		2660	3484	2391
Average	27938.7	25081.7	27033.7		26751	28460.7	27026.3		22818	22518	25691.7		8117.33	4689.33	6133.33		14090.3	14609.7	19728.3		2781.67	3419	2258.67
Normalize	1.03348	0.927794	1		0.989544	1.05279	0.999729		0.844059	0.832961	0.950358		0.300268	0.173463	0.226878		0.521214	0.540425	0.729769		0.102896	0.126472	0.0835501
