# Supplementary material for: Netrin signaling mediates survival of dormant epithelial ovarian cancer cells
Source: eLife. 2024 Jul 18;12:RP91766. doi: 10.7554/eLife.91766 (PMC11257678; doi:10.7554/eLife.91766)
Supplement: Figure 3—source data 1. [file elife-91766-fig3-data1.xlsx]

## Sheet: NTN Pathway Expression TOV1946
TOV 1946	Ad	Ad	Ad	Sph	Sph	Sph
GAPDH	14.2434	13.953	13.939	13.9809	14.0877	14.1177
NTN5	35.1456	35.0632	33.2688	34.2265	34.1722	34.5246
NTN5	35.2094	32.8215	34.2976	33.617	33.0726	34.1318
NTN5	34.8881	33.8684	34.2871	33.2285	34.3544	33.2211
Average	Ad	Sph-1	Sph-2	Sph-3		Normalize	Ad	Sph-1	Sph-2	Sph-3	Relative Expression Sph/Ad	Sph-1	Sph-2	Sph-3
GAPDH	14.0451	13.9809	14.0877	14.1177
NTN5	34.4925	34.2265	34.1722	34.5246			20.4474	20.2456	20.0845	20.4069		1.15015	1.286	1.02849
NTN5	34.1095	33.617	33.0726	34.1318			20.0644	19.6361	18.985	20.0142		1.3456	2.11311	1.0354
NTN5	34.3479	33.2285	34.3544	33.2211			20.3028	19.2476	20.2667	19.1035		2.07789	1.02528	2.29628
Log2FC	Sph-1	Sph-2	Sph-3
GAPDH
NTN5	0.201817	0.362895	0.0405218
NTN5	0.428244	1.07937	0.0501822
NTN5	1.05512	0.0360225	1.1993
	Ad	Sph		Normalize	Ad	Sph	Relative Expression Sph/Ad		Log2FC
GAPDH	14.0451	14.0621
NTN5	34.4925	34.3078			20.4474	20.2457		1.15009		0.201745
NTN5	34.1095	33.6072			20.0644	19.5451		1.43322		0.519264
NTN5	34.3479	33.6014			20.3028	19.5393		1.69758		0.763479
				Normalize	Ad	Sph	Relative Expression Sph/Ad		Log3FC
GAPDH	14.0451	14.0621
NTN5	34.3166	33.8388			20.2715	19.7767		1.40915		0.494829
TOV1946	Ad	Ad	Ad	Sph	Sph	Sph
GAPDH	14.3074	14.1335	14.506	13.9322	13.6416	14.4437
NTN3	34.8186	32.0458	30.0586	34.08	33.6701	34.4376
	Ad		Sph-1	Sph-2	Sph-3	Normalize	Ad	Sph-1	Sph-2	Sph-3	Relative Expression Sph/Ad	Sph-1	Sph-2	Sph-3	Log2FC	Sph-1	Sph-2	Sph-3
GAPDH	14.3156		13.9322	13.6416	14.4437										GAPDH
NTN3	32.3076		34.08	33.6701	34.4376		17.992	20.1479	20.0285	19.9939		0.224401	0.243757	0.249673	NTN3	-2.15585	-2.03649	-2.00189
	Ad	Sph		Normalize	Ad	Sph	Relative Expression Sph/Ad		log2FC
GAPDH	14.3156	14.0058						1.23954	0.309809
NTN3	32.3076	34.0626			17.992	20.0568		0.239029	-2.06474
TOV1946	Ad-1	Ad-2	Ad-3	Sph-1	Sph-2	Sph-3
GAPDH	14.2789	14.188	14.3767	13.8225	13.9641	15.221
NTN3	34.1271	33.0725	30.7848	33.7409	32.4976	33.1464
NTN4	28.4262	28.1224	28.9502	28.1714	28.5486	28.2119
Neo	29.3001	29.6322	29.4549	28.5679	28.3904	28.9462
Average	Ad	Sph		Normalize	Ad	Sph		Relative Expression Sph/Ad		Log2FC
GAPDH	14.2812	14.3359					GAPDH
NTN3	32.6615	33.1283			32.6615	33.1283	NTN3	0.723577		-0.466782
NTN4	28.4996	28.3106			28.4996	28.3106	NTN4	1.13995		0.188966
Neo	29.4624	28.6348			29.4624	28.6348	Neo	1.77469		0.827567
Normalize	Ad-1	Ad-2	Ad-3	Sph-1	Sph-2	Sph-3
GAPDH
NTN3	19.8482	18.8846	16.4081	19.9184	18.5335	17.9254
NTN4	14.1472	13.9344	14.5735	14.3489	14.5845	12.9908
Neo	15.0212	15.4442	15.0782	14.7455	14.4263	13.7251
	Ad	Sph-1	Sph-2	Sph-3	Normalize	Ad	Sph-1	Sph-2	Sph-3	Relative Expression Sph/Ad	Sph-1	Sph-2	Sph-3	Log2FC	Sph-1	Sph-2	Sph-3
GAPDH	14.2812	13.8225	13.9641	15.221						GAPDH	1.37432	1.24584	0.521295		0.458717	0.317119	-0.939828
NTN3	32.6615	33.7409	32.4976	33.1464		18.3803	19.9184	18.5335	17.9254	NTN3	0.344341	0.899265	1.3707		-1.53809	-0.153182	0.454917
NTN4	28.4996	28.1714	28.5486	28.2119		14.2184	14.3489	14.5845	12.9908	NTN4	0.913494	0.775854	2.34171		-0.130533	-0.366142	1.22756
Neo	29.4624	28.5679	28.3904	28.9462		15.1812	14.7455	14.4263	13.7251	Neo	1.3526	1.68754	2.74354		0.435735	0.754918	1.45604
TOV1946	TOV AD	TOV AD	TOV AD	TOV Sph-1	TOV Sph-1	TOV Sph-1	TOV Sph-2	TOV Sph-2	TOV Sph-2
GAPDH	14.7626	14.0634	13.865	14.1879	14.7558	14.7613	15.4535	15.6451	16.1326
NTN1	34.0344		33.2736	30.0713	30.7281	31.0894	32.0593	31.8647	30.4377
NTN3	29.5237	29.6439	30.0787	29.7083	30.126	29.8406	29.7302	30.142	30.0553
Unc5A	33.1725	33.5539	33.053	33.6216	32.6724	33.1147	34.5249	33.089	32.8973
Unc5B	34.5152		34.667	33.2361		33.2014	39.8159
Unc5C	33.3599	34.634	32.7243	31.5303	33.5886	31.7271		33.3913	34.5669
Unc5D	33.1362	35.3937	31.9373	32.8543	33.9058	32.7198	36.0384	34.5265	34.1489
DSCAM
	Ad	Sph-1	Sph-2	Normalize	Ad	Sph-1	Sph-2	Relative Expression Sph/AD	Sph-1	Sph-2	Log2FC	Sph-1	Sph-2
GAPDH	14.2303	14.5683	15.3497
NTN1	33.654	30.6296	31.2358		19.4237	16.0613	15.8862		10.2843	11.6116		3.36238	3.53749
NTN3	29.7488	29.8916	29.9788		15.5185	15.3233	14.6292		1.14484	1.85227		0.195144	0.889297
Unc5A	33.2598	33.1362	33.2597		19.0295	18.5679	17.91		1.37704	2.17269		0.461571	1.11948
Unc5B	34.5911	33.2188	36.5087		20.3608	18.6505	21.159		3.27229	0.575054		1.7103	-0.798231
Unc5C	33.5727	32.282	33.3184		19.3424	17.7137	17.9688		3.09237	2.59121		1.62871	1.37363
Unc5D	33.4891	33.16	34.2679		19.2587	18.5917	18.9182		1.58784	1.26621		0.667065	0.34052
	Ad	Sph	Normalize	Ad	Sph	Relative Expression Sph/Ad		Log2FC
GAPDH	14.2303	15.156
NTN1	33.654	31.0417		19.4237	15.8857		11.6153	3.53795
NTN3	29.7488	29.9337		15.5185	14.7777		1.67105	0.740758
Unc5A	33.2598	33.32		19.0295	18.164		1.82201	0.86553
Unc5B	34.5911	35.4178		20.3608	20.2618		1.07102	0.0989795
Unc5C	33.5727	32.9608		19.3424	17.8048		2.90314	1.53762
Unc5D	33.4891	34.0323		19.2587	18.8762		1.30359	0.382486
TOV1946	TOV AD	TOV AD	TOV AD	TOV Sph-1	TOV Sph-1	TOV Sph-1	TOV Sph-2	TOV Sph-2	TOV Sph-2
GAPDH	14.7213	15.0512	14.4293	14.3037	14.0697	14.1806	16.0028	16.0162	16.3547
NTN4	27.854	28.1055	27.7314	28.1443	27.7913	28.4358	29.1556	29.0171	29.0735
NTN5	35.319			34.1933	33.2612	34.8416	33.5815	35.1238
Neo	28.5306	29.0432	28.1532	28.7139	28.6363	28.2453	29.654	29.1653	29.7603
DCC 1	34.1331	35.3127		37.3947	35.2142	33.7716		34.1224	34.9803
DCC 2	35.8484	33.9698	34.168	34.8576	35.098	35.0369	34.5086	35.8111	35.295
DAPK1	35.0713	34.6401	35.2924	33.5617	34.194	34.2121
	Ad	Sph	Normalize	Ad	Sph	Realative Expression Sph/Ad		Log2FC
GAPDH	14.734	15.1546
NTN4	27.897	28.6029		13.163	13.4483		0.820582	-0.28528
NTN5	35.319	34.2003		20.5851	19.0457		2.90673	1.5394
Neo	28.5757	29.0292		13.8417	13.8746		0.977475	-0.032869
DCC 1	34.7229	35.0966		19.9889	19.942		1.03304	0.046892
DCC 2	34.6621	35.1012		19.9281	19.9466		0.987269	-0.0184842
DAPK1	35.0013	33.9893		20.2673	18.8346		2.69949	1.43269
	Ad	Sph-1	Sph-2	Normalize	Ad	Sph-1	Sph-2	Relative Expression Sph/Ad	Sph-1	Sph-2	Log2FC	Sph-1	Sph-2
GAPDH	14.734	14.1847	16.1246
NTN4	27.897	28.1238	29.082		13.163	13.9391	12.9575		0.583938	1.15313		-0.776113	0.205553
NTN5	35.319	34.0987	34.3526		20.5851	19.914	18.2281		1.5922	5.123		0.67102	2.35699
Neo	28.5757	28.5318	29.5265		13.8417	14.3472	13.402		0.704428	1.35636		-0.505475	0.439737
DCC 1	34.7229	35.4602	34.5513		19.9889	21.2755	18.4268		0.40992	2.9529		-1.28659	1.56213
DCC 2	34.6621	34.9975	35.2049		19.9281	20.8128	19.0803		0.541587	1.79971		-0.884734	0.847766
DAPK1	35.0013	33.9893			20.2673	19.8046			1.37816			0.462739
TOV1946	TOV AD	TOV AD	TOV AD	TOV Sph	TOV Sph	TOV Sph
GAPDH	14.4809	14.1683	14.2267	14.9165	14.2027	14.9093
Neo	28.7899	28.7321	29.3701	29.0305	28.5965	28.5559
DSCAM I	34.7177					34.1685
DSCAM II	34.83	34.0397	32.6249	35.3946	34.0624	34.6757
DCC II	33.9342	34.0735	33.4006	33.6576	34.6395	34.6395
DAPK1 I	34.4374	35.3705	33.7995	34.4091	37.2955	35.5376
DAPK1 II	34.6773	35.419		36.7551	34.2016	34.4306
Average	TOV AD	TOV Sph	Average	TOV AD		TOV Sph		Ad	Sph	Normalize Ad	Normalize Sph
GAPDH	14.292	14.6762	GAPDH	14.292		14.6762
Neo	28.964	28.7276	Neo	28.964		28.7276
DSCAM I	34.7177	34.1685	DSCAM I	34.7177		34.1685
DSCAM II	33.8315	34.7109	DSCAM II	33.8315	34.7177	34.7109	34.1685	34.2746	34.4397	19.9826	19.7636	1.16397	0.219056
DCC II	33.8028	34.3122	DCC II	33.8028		34.3122
DAPK1 I	34.5358	35.7474	DAPK1 I	34.5358		35.7474
DAPK1 II	35.0481	35.1291	DAPK1 II	35.0481		35.1291
Normalize	TOV AD	TOV Sph
Neo	14.6721	14.0515
DSCAM I	20.4257	19.4924
DSCAM II	19.5395	20.0348
DCC II	19.5108	19.6361
DAPK1 I	20.2438	21.0712
DAPK1 II	20.7562	20.4529
D Sph/AD	TOV
Neo	1.53752
DSCAM I	1.90967
DSCAM II	0.709457
DCC II	0.916832
DAPK1 I	0.563554
DAPK1 II	1.23392
Log2 FC
Neo	0.620609
DSCAM I	0.933323
DSCAM II	-0.495212
DCC II	-0.125271
DAPK1 I	-0.827375
DAPK1 II	0.303252
TOV1946	Tov Ad	Tov Ad	Tov Ad	Tov Sph	Tov Sph	Tov Sph	Tov Ad	Tov Ad	Tov Ad	Tov Sph	Tov Sph	Tov Sph
GAPDH	14.6299	14.3071	14.4796	14.0887	14.7716	14.7822	14.2196	14.2118	14.3654	15.1532	15.1236	15.4303
DCC	33.1524	32.5626	32.4308	33.197	35.0614	33.2383	33.1238	33.2305	33.963	33.6854	33.31	34.2463
Unc5A	31.4191	31.7941	31.1596	31.6962	31.6221	31.0369	30.987	31.6077	31.6781	30.7751	32.3696	32.0396
Unc5B	35.5872		34.3884					34.2784	34.9824	33.5248
Unc5D I	31.5852	33.1039	31.3482	32.9367	31.5381	30.6908	32.2794	30.8563	31.0747	32.8799	33.0185	32.4115
Unc5D II	32.2701	32.0646	31.4316	32.8785	32.9981	33.0996	31.2034	31.0386	31.4592	32.9124	32.4952	32.8584
NTN1	34.5221	34.2645		33.926	33.0023	32.032	34.1605	35.1161	37.1017	32.7183	32.3755	33.0225
NTN3	34.6831	33.8693	32.7476	33.4765	32.9648	34.822	33.5185	32.8762	33.6936	34.3812	33.6727	33.8376
Average	Tov Ad	Tov Sph	Tov Ad	Tov Sph
GAPDH	14.4722	14.5475	14.2656	15.2357
DCC	32.7153	33.8322	33.4391	33.7472
Unc5A	31.4576	31.4517	31.4243	31.7281
Unc5B	34.9878		34.6304	33.5248
Unc5D I	32.0124	31.7219	31.4034	32.7699
Unc5D II	31.9221	32.9921	31.2337	32.7553
NTN1	34.3933	32.9868	35.4595	32.7054
NTN3	33.7667	33.7544	33.3627	33.9638
Normalize	Tov Ad	Tov Sph	Tov Ad	Tov Sph				Relative expression	Tov Sph-1	Tov Sph-2		Log2 FC	Tov Sph-1	Tov Sph-2
DCC	18.2431	19.2847	19.1735	18.5115				DCC	0.485768	1.58221		DCC	-1.04166	0.661937
Unc5A	16.9854	16.9042	17.1587	16.4925				Unc5A	1.05787	1.58691		Unc5A	0.0811629	0.666219
Unc5B	20.5156		20.3648	18.2892				Unc5B		4.21528		Unc5B		2.07563
Unc5D I	17.5402	17.1744	17.1378	17.5343				Unc5D I	1.28866	0.75974		Unc5D I	0.365869	-0.396422
Unc5D II	17.4499	18.4446	16.9681	17.5196				Unc5D II	0.501848	0.682322		Unc5D II	-0.994678	-0.551475
NTN1	19.9211	18.4393	21.1939	17.4698				NTN1	2.79308	13.2149		NTN1	1.48186	3.7241
NTN3	19.2944	19.2069	19.0971	18.7281				NTN3	1.06255	1.29147		NTN3	0.087534	0.369009
	Ad-1	Ad-2	Sph-1	Sph-2		Normalize	Ad-1	Ad-2	Sph-1	Sph-2		Relative Expression Sph/Ad	Sph-1	Sph-2	log2FC	Sph-1	Sph-2
GAPDH	14.4722	14.2656	14.5475	15.2357
Unc5D	31.9673	31.3186	32.357	32.7626			17.4951	17.053	17.8095	17.5269			0.804183	0.719991		-0.314404	-0.473949
TOV1946	Tov Ad	Tov Ad	Tov Ad	Tov Sph	Tov Sph	Tov Sph
GAPDH	14.6559	14.7221	14.5312	13.694	14.5232	14.2008
Unc5B		38.5252	33.5003			34.8772
Unc5B II	34.4026	33.3932	33.5003	35.4493	34.8772
	Ad		Sph
GAPDH	14.6364		14.1394
Unc5B	36.0127		34.8772
Unc5B II	33.7654		35.1633
Unc5B	34.8891		35.0203
Normalize					Relative Expression Sph/Ad			Log2FC
GAPDH
Unc5B	21.3764		20.7379			1.55668		0.638474
Unc5B II	19.129		21.0239			0.268886		-1.89493
Unc5B	20.2527		20.8809			0.64697		-0.628229
TOV1946	TOV Ad	TOV Ad	TOV Ad	TOV Ad	TOV Ad	TOV Ad	TOV Sph	TOV Sph	TOV Sph	TOV Sph	TOV Sph	TOV Sph
GAPDH	16.5193	16.0246	16.2457	16.3249	16.0621	16.2191	18.1976	17.905	17.9975	18.2147	18.2415	18.3361
Unc5A	28.3029	28.0188	28.4846	28.3545	28.4849	28.2614	30.2961	30.2192	30.6386	30.8023	29.7589	31.1255
Unc5B	33.1678	32.6702	33.1063	33.7178	33.9149	34.616	31.7555	32.3063	31.6085	31.3927	31.5615	32.6751
Unc5D	31.1974	30.9441	31.0607	31.1137	31.0871	30.8343	32.187	31.9795	32.1724	31.3805	32.2509	32.0066
DSCAM	27.4202	27.3847	27.1356	26.9232	26.9234	27.0981	31.9959	32.1622	32.7691	32.0426	32.7102	32.4532
NTN1	30.1457	30.2722	30.294	30.2306	30.3674	29.9914	28.9144	28.6802	29.332	29.0465	28.9254	28.9005
NTN4	26.8431	26.528	26.5818	26.5267	26.5334	26.1511	28.1218	28.1243	28.6296	28.4524	28.147	28.4627
NTN5	32.3481	32.6697	32.2372	33.1518	32.1625	32.9663	33.9694	36.4149	36.4437	34.9079	34.5989	36.4098
	Average Ad	Normalize Ad	Average Sph	Normalize Sph		Relative Expression Sph/Ad		Log2FC
GAPDH	16.2326		18.1487
Unc5A	28.3178	12.0852	30.4734	12.3247		0.847076		-0.239437
Unc5B	33.5322	17.2995	31.8833	13.7345		11.8351		3.56501
Unc5D	31.0396	14.807	31.9961	13.8474		1.94473		0.959567
DSCAM	27.1475	10.9149	32.3555	14.2068		0.102105		-3.29188
NTN1	30.2169	13.9843	28.9665	10.8178		8.9788		3.16652
NTN4	26.5273	10.2947	28.323	10.1742		1.0871		0.120491
NTN5	32.5893	16.3567	35.4574	17.3087		0.516906		-0.952027
TOV1946
	Tov Ad	Tov Ad	Tov Ad	Tov Ad	Tov Ad	Tov Sph	Tov Sph	Tov Sph	Tov Sph	Tov Sph	Tov Sph
GAPDH	15.0097		14.2539	14.2256	14.9801	15.1374	14.5424	14.4296	14.6947	14.6086	15.032
Unc5B	35.2677	34.6372	36.128			37.1236			37.8683
					TOV1946
						Average Ad	Average Sph	Normalize Ad	Normalize Sph	Relative Expression Sph/Ad	log2FC
					GAPDH	14.6173	14.7408
					Unc5B	35.3443	37.496	20.727	22.7552	0.245158	-2.02822
TOV1946
	Tov Ad	Tov Ad	Tov Ad	Tov Sph	Tov Sph	Tov Sph
GAPDH	14.2685	14.145	14.287	13.7565	14.0214	14.069
Unc5B-i		33.7466	33.5611			33.8151
Unc5B-ii			33.5611
Unc5D	31.9089	31.589	31.8675	31.3886	31.8799	33.1001
	Ad	Sph	Normalize Ad	Sph	Relative Expression Sph/Ad		Log2FC
GAPDH	14.2335	13.949
Unc5B-i	33.6538	33.8151	19.4203	19.8661		0.73418	-0.445794
Unc5B-ii	33.5611		19.3276	-13.949
Unc5D	31.7885	32.1229	17.555	18.1739		0.651147	-0.618944
TOV1946	Tov Ad	Tov Ad	Tov Ad	Tov Sph	Tov Sph	Tov Sph
GAPDH	14.1282	13.5008	14.0204	15.0523	14.8376	14.5569
Unc5B-i		34.1422	35.0486	33.1932	34.4691	34.3872
Unc5B-ii			34.1422	33.8151		34.3872
Unc5D	30.9761	31.3315	31.7092	33.0967	31.5531	31.6315
	Ad	Sph	Normalize Ad	Sph	Relative Expression Sph/Ad		Log2FC
GAPDH	13.8831	14.8156
Unc5B-i	34.5954	34.0165	20.7123	19.2009		2.85089	1.51141
Unc5B-ii	34.1422	34.1011	20.259	19.2855		1.96366	0.973543
Unc5D	31.339	32.0938	17.4558	17.2782		1.13107	0.177685
TOV1946	Ad-1	Ad-2	Ad-3	Ad-4	Sph-1	Sph-2	Sph-3	Sph-4
GAPDH	13.3713	13.4989			14.3845	13.5693	14.5736	14.1406
Unc5C	33.8113	33.2992			31.6144	33.7823	32.9394	32.6562
DCC	34.6393	34.7628			34.4674	33.8562	34.7733
DSCAM	35.3306	39.2537			34.8368	33.589	36.3381
Average				Average Ad	Average Sph	Normalize Ad	Normalize Sph	Relative Expression Sph/Ad	Log2FC
GAPDH				13.4351	14.167
Unc5C				33.5552	32.7481	20.1202	18.5811	2.90609	1.53908
DCC				34.7011	34.3657	21.266	20.1987	2.09554	1.06732
DSCAM				37.2922	34.9213	23.8571	20.7543	8.59053	3.10275
TOV1946	Ad-1	Ad-2	Ad-3	Ad-4	Sph-1	Sph-2	Sph-3	Sph-4
GAPDH	14.2984	14.2383			15.3435	14.9867	15.0958	14.9991
NTN4	28.015	27.9381			28.6107	28.8969	28.9802	28.6284
NTN5	35.3067				36.4959	35.7379	35.8932	36.5762
Average	Ad Av	Normalize Ad	Sph Av	Normalize	Relative Expression Sph/Ad		Log2FC
GAPDH	14.2684		15.1063
NTN4	27.9765	13.7082	28.7791	13.6728		1.02482		0.0353763
NTN5	35.3067	21.0384	36.1758	21.0695		0.978638		-0.0311523
TOV1946	Ad-1	Ad-2			Sph-1	Sph-2
GAPDH	14.9787	14.6966			16.0166	16.0269
NTN5	35.4545	37.4394			34.8834	36.1499
DSCAM
Neo-1	30.1867	30.1214			30.0268	30.1427
Average	Ad	Sph	Normalize AD	Normalize Sph	Relative Expression Sph/Ad	Log2FC
GAPDH	14.8377	16.0218
NTN5	36.447	35.5167	21.6093	19.4949	4.33013	2.11441
DSCAM
Neo-1	30.1541	30.0847	15.3164	14.063	2.3841	1.25344
TOV	Ad-1	Ad-2	Sph-1	Sph-2	Sph-3	Sph-4
GAPDH	14.0067	13.8157	14.9003	14.8633	14.5524	14.3405
NTN1		34.3473	31.0532	31.0356	31.9627	31.109
NTN3	32.3201	37.3365	35.8428	37.6502	36.0519	35.5942
Unc5A	33.8459	33.1918	34.5326	34.823	35.9099	33.1609
Unc5B		34.7902	35.3382
	Ad	Sph	Normalize Ad	Normalize Sph	Relative Expression Sph/Ad		Log2FC
GAPDH	13.9112	14.6641
NTN1	34.3473	31.2901	20.4362	16.626		14.0271	3.81014
NTN3	34.8283	36.2848	20.9171	21.6207		0.61407	-0.703525
Unc5A	33.5189	34.6066	19.6077	19.9425		0.792901	-0.334787
Unc5B	34.7902	35.3382	20.879	20.6741		1.15265	0.204958
TOV1946	TOV Ad	TOV Ad	TOV Ad	TOV Sph	TOV Sph	TOV Sph
	GAPDH	GAPDH	GAPDH	GAPDH	GAPDH	GAPDH
GAPDH	14.1658	14.111	13.6539	13.9286	13.9964	14.2223
	Unc5C	Unc5C	Unc5C	Unc5C	Unc5C	Unc5C
Unc5C	33.0768	32.5012	32.3567	34.1356	34.2121	32.0469
	Unc5C	Unc5C	Unc5C	Unc5C	Unc5C	Unc5C
Unc5C	32.2986	33.0178	33.2367	32.1612	32.5647	32.0108
	Unc5C	Unc5C	Unc5C	Unc5C	Unc5C	Unc5C
Unc5C	32.9092	33.2964	33.0919	32.2408	32.1461	32.4597
	DSCAM	DSCAM	DSCAM	DSCAM	DSCAM	DSCAM
DSCAM		34.7381
	DSCAM	DSCAM	DSCAM	DSCAM	DSCAM	DSCAM
DSCAM					35.2134
	Ad	Sph	Normalize	Ad	Sph		Relative Expression Sph/Ad		Log2FC
GAPDH	13.9769	14.0491
Unc5C	32.6449	33.4648		32.6449	33.4648			0.566468	-0.819934
Unc5C	32.851	32.2456		32.851	32.2456			1.52147	0.605469
Unc5C	33.0992	32.2822		33.0992	32.2822			1.76168	0.816948
DSCAM	34.7381	35.2134		34.7381	35.2134			0.719322	-0.475291
Unc5C	32.865	32.6642		18.8881	18.6151			1.20833	0.273011
TOV	Ad	Ad	Ad	Sph	Sph	Sph
GAPDH	14.4282	14.1352	14.1507	14.1389	14.509	14.6299
Unc5C	33.4125	32.5304	32.05	32.4776	34.2231	33.1207
DSCAM	35.5651	33.7564	33.2138	34.0421	34.3677	34.7767
DSCAM	33.6917	33.1253	34.2907	33.5209	34.7315	34.0348
	Ad	Sph		normalize	Ad	Sph		Relative Expresion Sph/Ad		Log2FC
GAPDH	14.238	14.4259
Unc5C	32.6643	33.2738			-1.82823	-0.952705			0.545054	-0.875529
DSCAM	34.1784	34.3955			-0.31413	0.168952			0.715448	-0.483082
DSCAM	33.7026	34.0957			-0.789976	-0.130784			0.633233	-0.659192
DSCAM	33.9405	34.2456			19.7025	19.8197			0.92197	-0.117208

## Sheet: NTN Pathway Expression iOvCa147
iOvCa147	Ad-1	Ad-2	Ad-3	Sph-1	Sph-2	Sph-3
GAPDH	15.2209	15.5335	15.0168	16.2435	16.0737	16.343
NTN3	35.0772	29.7671	28.1995	32.5342	34.3044	34.1898
NTN4	26.0334	25.769	25.7014	26.4231	26.5662	26.4217
Neo-1	25.0105	24.7216	24.7477	24.0007	23.9871	24.036
Average	Ad	Sph		Normalize	Ad	Sph		Relative Expression Sph/Ad		Log2FC
GAPDH	15.2571	16.22
NTN3	31.0146	33.6761			15.7575	17.4561		0.308088		-1.69859
NTN4	25.8346	26.4703			10.5775	10.2503		1.25458		0.327206
Neo-1	24.8266	24.0079			9.5695	7.7879		3.43808		1.7816
	Ad		Sph-1	Sph-2	Sph-3		Normalize	Ad	Sph-1	Sph-2	Sph-3		Relative Expression Sph/Ad	Sph-1	Sph-2	Sph-3	Log2FC	Sph-1	Sph-2	Sph-3
GAPDH	15.2571		16.2435	16.0737	16.343		GAPDH						GAPDH	0.504735	0.567769	0.471108		-0.986402	-0.816624	-1.08587
NTN3	31.0146		32.5342	34.3044	34.1898		NTN3	15.7575	16.2907	18.2307	17.8468		NTN3	0.691009	0.180089	0.234992		-0.533224	-2.47322	-2.08931
NTN4	25.8346		26.4231	26.5662	26.4217		NTN4	10.5775	10.1796	10.4925	10.0788		NTN4	1.31757	1.06067	1.41299		0.397883	0.0849789	0.498755
Neo-1	24.8266		24.0007	23.9871	24.036		Neo-1	9.5695	7.7572	7.91341	7.69309		Neo-1	3.51203	3.15162	3.67162		1.8123	1.65609	1.87642
iOvCa147 AD	Ad	Sph-1	Sph-2
GAPDH	16.1822	16.3681	17.0569
NTN1	27.3346	27.2545	27.5858
NTN3	30.0888	29.387	30.3883
Unc5A	30.0765	31.2083	30.5916
Unc5B	32.1939	28.8415	29.182
Unc5C	28.6897	28.8705	28.9109
Unc5D	35.3213	33.2542	32.4918
DSCAM	30.7278	34.2071	33.1864
Average	Ad	Normalize Ad	Average Sph	Normalize Sph	Relative Expression Sph/Ad	log2FC
GAPDH	16.1822		16.7125
NTN1	27.3346	11.1524	27.4201	10.7076	1.3611	0.444772
NTN3	30.0888	13.9066	29.8876	13.1751	1.66028	0.73143
Unc5A	30.0765	13.8943	30.9	14.1875	0.816124	-0.29314
Unc5B	32.1939	16.0117	29.0117	12.2993	13.1089	3.71247
Unc5C	28.6897	12.5075	28.8907	12.1782	1.25636	0.329246
Unc5D	35.3213	19.1391	32.873	16.1605	7.88248	2.97865
DSCAM	30.7278	14.5456	33.6967	16.9842	0.184453	-2.43867
iOvCa147	iOvCa147Ad	iOvCa147 Ad	iOvCa147 Ad	iOvCa147 Sph	iOvCa147 Sph	iOvCa147 Sph
GAPDH	17.677	17.1825	17.1426	17.5351	17.3069	17.4601
NTN1	28.4787	28.1462	28.6325	28.4442	28.0528	27.9107
NTN3	30.124	30.1687	30.238	30.7004	30.1327	29.8335
Unc5A	31.0205	30.6374	30.5538	32.1128	31.2641	31.2745
Unc5B	31.3484	31.2658	31.3638	29.376	29.8418	30.0945
Unc5C	29.7509	29.7951	29.9903	29.5687	29.0338	29.166
Unc5D	33.1275	32.7328	32.9312	33.5396	32.3705	32.7248
Neo	25.6215	25.9674	25.5145	24.8041	24.4015	25.008
Average	iOvCa147 Ad			iOvCa147 Sph
GAPDH	17.334			17.434
NTN1	28.4191			28.1359
NTN3	30.1769			30.2222
Unc5A	30.7373			31.5505
Unc5B	31.326			29.7708
Unc5C	29.8454			29.2562
Unc5D	32.9305			32.8783
Neo	25.7011			24.7378
Normalize	iOvCa147 Ad	iOvCa147 Sph	Relative Expression Sph/AD	Log2FC
NTN1	11.0851	10.7019	1.30425	0.383219
NTN3	12.8429	12.7882	1.03866	0.0547301
Unc5A	13.4032	14.1164	0.609956	-0.713223
Unc5B	13.992	12.3367	3.14977	1.65525
Unc5C	12.5114	11.8221	1.61247	0.68927
Unc5D	15.5965	15.4443	1.11127	0.152206
Neo	8.36711	7.30381	2.0897	1.06329
iOvCa147	iOvCa147 AD	iOvCa147 Sph	iOvCa147 Sph
GAPDH	16.8085	16.4015	17.231
NTN4	26.6516	27.5292	27.24
NTN5	34.1323	34.7814	34.0642
Neo	24.9125	24.0233	23.8129
DCC 1	33.0717	31.8116	32.1269
DCC 2	33.3834	32.8381	34.3205
DAPK1	25.1727	25.7792	25.3428
			Normalize	Ad	Sph	Relative Expression Sph/Ad		Log2FC
GAPDH	16.8085	16.8162
NTN4	26.6516	27.3846		9.84308	10.5683		0.604885	-0.725267
NTN5	34.1323	34.4228		17.3238	17.6066		0.822003	-0.282784
Neo	24.9125	23.9181		8.10399	7.10186		2.00295	1.00213
DCC 1	33.0717	31.9693		16.2632	15.153		2.15873	1.11018
DCC 2	33.3834	33.5793		16.5749	16.7631		0.877723	-0.188163
DAPK1	25.1727	25.561		8.36423	8.74479		0.768137	-0.380565
iOvCa147	iOvCa147 AD	iOvCa147 AD	iOvCa147 AD	iOvCa147 Sph	iOvCa147 Sph	iOvCa147 Sph
GAPDH	15.8799	16.5354	16.7353	16.2078	16.3055	16.2793
NTN4	27.1223	27.0288	26.9498	26.7936	26.8648	27.1813
NTN5	35.0893	35.1028	34.1024	34.0963	34.9056	34.3102
Neo	24.297	24.1592	23.9399	23.7643	23.3443	24.1091
DCC I	34.1265	34.0298	32.4488	32.3181	31.77	31.6223
DCC II	31.9134	32.669	33.4193	34.7279	33.0251	32.3414
DAPK1	25.2648	25.0467	26.134	26.0068	25.2918	25.4221
	iOvCa147 AD
Average	iOvCa147 AD	iOvCa147 Sph
GAPDH	16.3836	16.2642
NTN4	27.0337	26.9466
NTN5	34.7648	34.4374
Neo	24.132	23.7392
DCC I	33.535	31.9035
DCC II	32.6672	33.3648
DAPK1	25.4818	25.5736
Normalize				Relative Expression Sph/Ad		Log2FC
NTN4	10.6501	10.6824		0.977888		-0.032259
NTN5	18.3813	18.1732		1.15519		0.208132
Neo	7.74847	7.47501		1.2087		0.273453
DCC I	17.1515	15.6393		2.85242		1.51219
DCC II	16.2836	17.1006		0.567651		-0.816924
iOvCa147	iOvCa147 AD		iOvCa147 AD		iOvCa147 AD		iOvCa147 AD	iOvCa147 Sph	iOvCa147 Sph	iOvCa147 Sph	iOvCa147 Sph
GAPDH	16.457		16.082		16.0327		16.0839	18.0191	17.3383	17.3449	18.1546
NTN3	33.2792		33.3678		34.275		34.2329	34.2533	34.6056	34.9255	34.1619
Unc5C I	31.6827		32.0776		32.3971		31.7988	32.5316	32.0228	31.8299	31.5218
Unc5C II	29.9119		29.2596		29.341		29.5496	30.206	30.0208	29.8043	30.198
Unc5C III	32.9058		34.0842		32.2639		32.2837	31.1005	31.7371	31.0317	30.622
Unc5D	30.6343		30.9783		30.875		31.0123	31.0483	32.6994	30.7636	31.3456
DCC II	31.2064		31.5083		31.8406		31.0976	32.1582	32.6278	31.3763	32.792
DAPK1	24.3176		24.1696		24.7627		24.4542	26.175	26.3894	26.5594	26.4943
Average	iOvCa147 AD		iOvCa147 Sph
GAPDH	16.1639		17.7142
NTN3	33.7887		34.4866
Unc5CI	31.989		31.9765
Unc5CII	29.5155		30.0573
Unc5C III	32.8844		31.1228
Unc5D	30.875		31.4642
DCC	31.4133		32.2386
DAPK1	24.426		26.4045
Normalize								Relative expression				Log2FC
NTN3	17.6248		16.7724					NTN3	1.80556			NTN3	0.852444
Unc5C I	15.8251		14.2623					Unc5C I	2.9543			Unc5C I	1.56282
Unc5C II	13.3516		12.3431					Unc5C II	2.01187			Unc5C II	1.00854
Unc5C III	16.7205		13.4086					Unc5C III	9.93079			Unc5C III	3.31191
Unc5D	14.7111		13.75					Unc5D	1.94678			Unc5D	0.961091
DCC	15.2493		14.5244					DCC	1.65289			DCC	0.724987
DAPK1	8.26211		8.69032					DAPK1	0.743185			DAPK1	-0.428207
iOvCa147	Ad-1	Ad-2	Ad-3	Ad-4	Sph-1	Sph-2	Sph-3	Sph-4
GAPDH	15.1132	16.176			15.5131	15.4561
Unc5D	32.613	32.812	32.4363	31.8311	32.0834	31.2645	31.7298	31.5234
iOvCa147	Average Ad	Normalize Ad	Average Sph	Normalize Sph	Realative Expression Sph/Ad	Log2FC
GAPDH	15.6446		15.4846
Unc5D	32.4231	16.7785	31.6503	16.1657	1.52922	0.612799
Average
iOvCa147	Ad	Sph		Normalize Ad	Normalize Sph		Relative Expression Sph/Ad		Log2FC
GAPDH	15.6446	15.4846
Unc5D	32.4231	31.6503		16.7785	16.1657		1.52922		0.612799
iOvCa147	Ad-1	Ad-2	Ad-3	Ad-4	Sph-1	Sph-2
GAPDH	15.9204	15.8372			15.3608	15.4157
Unc5C	27.7285	28.0752			28.2754	28.0293
DCC	31.6239	32.4906			33.0312	32.1348
DSCAM	30.5844	32.1626			34.0816	32.5069
Average	Ad	Sph		Normalize	Ad	Sph
GAPDH	15.8788	15.3882
Unc5C	27.9018	28.1523			12.023	12.7641
DCC	32.0572	32.583			16.1784	17.1948
DSCAM	31.3735	33.2943			15.4947	17.906
				Relative Expression Sph/Ad
				GAPDH
				Unc5C	0.598279
				DCC	0.494359
				DSCAM	0.187977
				Log2FC
				GAPDH
				Unc5C	-0.74111
				DCC	-1.01637
				DSCAM	-2.41137
iOvCa147	Ad-1	Ad-2	Ad-3	Ad-4	Sph-1	Sph-2
GAPDH	16.9614	16.8029			17.0437	16.9645
NTN4	27.0772	26.9283			27.1273	27.1481
	Average Ad	Normalize Ad	Average Sph	Normalize Sph		Relative Expression Sph/Ad	Log3FC
GAPDH	16.8821		17.0041
NTN4	27.0027	10.1206	27.1377	10.1336		0.99101	-0.013029
iOvCa147	Ad-1	Ad-2			Sph-1	Sph-2
GAPDH	17.1171	16.3834			17.3006	17.2331
NTN5	34.7205	36.7338			35.3466	35.8578
DSCAM	34.8582	33.0961				35.9274
Neo-1	25.8407	25.8869			25.0696	25.2062
Average	Ad	Sph	Normalize Ad	Normalize Sph	Relative Expression Sph/Ad	Log2FC
GAPDH	16.7502	17.2669
NTN5	35.7271	35.6022	18.9769	18.3354	1.55998	0.641531
DSCAM	33.9771	35.9274	17.2269	18.6606	0.370182	-1.43369
Neo-1	25.8638	25.1379	9.11355	7.87106	2.36608	1.2425
iOvCa147	Ad-1	Ad-2	Sph-1	Sph-2
GAPDH	15.8929	16.2885	16.3033	16.2229
NTN1	27.6381	27.9504	27.8853	27.6442
NTN3	35.1887	36.6258	34.5994	38.0767
Unc5A	31.2257	30.7322	32.0917	32.0309
Unc5B	33.4566	31.6783	29.6186	30.0266
	Av Ad	AV Sph	Normalize Ad	Normalize Sph	Relative Expression Sph/Ad	Log2FC
GAPDH	16.0907	16.2631
NTN1	27.7943	27.7648	11.7036	11.5016	1.15024	0.201936
NTN3	35.9073	36.338	19.8166	20.0749	0.836047	-0.258344
Unc5A	30.9789	32.0613	14.8882	15.7982	0.532191	-0.909985
Unc5B	32.5675	29.8226	16.4768	13.5595	7.55405	2.91725
iOvCa147	Ad	Ad	Ad	Sph	Sph	Sph
GAPDH	15.7408	15.4487	15.4794	16.5807	16.4826	16.6779
Unc5B	33.8497	32.2961	31.7249	31.374	31.2458	30.556
	Average Ad	Sph		Normalize	Ad	Sph		Relative Expression Sph/Ad	Log2FC
GAPDH	15.5563	16.5804
Unc5B	32.6236	31.0586			17.0673	14.4782		6.01706	2.58906
iOvCa147	AD	Ad	Ad	Sph	Sph	Sph
GAPDH	15.5771	15.5311	15.4709	16.9689	16.6559	16.6907
Unc5B	32.799	33.1146	32.5296	31.1262	30.8646	31.0368
	Average Ad	Sph	Normalize	Ad	Sph	Relative Expression Sph/Ad		Log2FC
GAPDH	15.5264	16.7719
Unc5B	32.8144	31.0092		17.288	14.2373		8.28636	3.05074
iOvCa147	Ad	Ad	Ad	Sph	Sph	Sph
GAPDH	16.026	16.0265	15.4598	16.88	17.1289	17.2057
Unc5B	32.7845	32.5955	32.204	30.8331	31.2805	31.0121
	Average			Normalize		Relative Expression Sph	Ad	Log2FC
GAPDH	15.8374	17.0715
Unc5B	32.528	31.0419		16.6906	13.9704		6.58958	2.72019

## Sheet: NTN pathway Expression OVCAR8
OVCAR8	Ad	Ad	Ad	Sph	Sph	Sph
GAPDH	15.0499	15.1602	15.1479	14.8517	14.7351	15.143
NTN5	31.6167	31.1182	31.0651	31.1417	30.9224	30.9621
NTN5	31.2379	31.4402	31.3747	31.1165	31.1498	30.6546
NTN5	31.0209	32.5824	31.3262	30.3733	30.8437	30.8777
	Ad	Sph-1	Sph-2	Sph-3	Normalize	Ad	Sph-1	Sph-2	Sph-3	Relative Expression Sph/Ad	Sph-1	Sph-2	Sph-3
GAPDH	15.1193	14.8517	14.7351	15.143
NTN5	31.2667	31.1417	30.9224	30.9621		16.1474	16.29	16.1872	15.8191		0.905881	0.972747	1.25547
NTN5	31.3509	31.1165	31.1498	30.6546		16.2316	16.2648	16.4147	15.5116		0.977247	0.880825	1.6472
NTN5	31.6432	30.3733	30.8437	30.8777		16.5239	15.5215	16.1086	15.7347		2.00324	1.33358	1.72803
Log2FC	Sph-1	Sph-2	Sph-3
GAPDH
NTN5	-0.142606	-0.0398629	0.328231
NTN5	-0.0332047	-0.183073	0.720019
NTN5	1.00233	0.415299	0.789131
	Ad	Sph		Normalize	Ad	Sph	Relative Expression Sph/Ad			Log2FC
GAPDH	15.1193	14.91							GAPDH
NTN5	31.2667	31.0087			16.1474	16.0988		1.03425	NTN5	0.0485871
NTN5	31.3509	30.9736			16.2316	16.0637		1.12343	NTN5	0.167914
NTN5	31.6432	30.6982			16.5239	15.7883		1.66508	NTN5	0.735588
	Ad	Sph		Normalize	Ad	Sph	Relative Expression Sph/Ad			Log2FC
GAPDH	15.1193	14.91
NTN5	31.4203	30.8935			16.3009	15.9836		1.24605		0.317363
OVCAR8	Ad-1	Ad-2	Ad-3	Sph-1	Sph-2	Sph-3
GAPDH	14.8633	15.1065	14.7784	14.5196	14.5597	14.6404
NTN3	30.8443	31.1293	31.6699	29.4686	29.1027	29.7383
Average	Ad		Sph-1	Sph-2	Sph-3		Normalize	Ad	Sph-1	Sph-2	Sph-3		Relative Expression Sph/Ad		Sph-1	Sph-2	Sph-3		log2FC	Sph-1	Sph-2	Sph-3
GAPDH	14.9161		14.5196	14.5597	14.6404								GAPDH
NTN3	31.2145		29.4686	29.1027	29.7383			16.2985	14.949	14.543	15.0979		NTN3		2.54813	3.37641	2.29835			1.34944	1.75549	1.2006
	Ad		Sph		Normalize	Ad	Sph	Relative Expression Sph/Ad		Log2FC
GAPDH	14.9161		14.5732
NTN3	31.2145		29.4365			16.2985	14.8633		2.70415	1.43518
OVCAR8	Ad	Ad	Ad	Sph	Sph	Sph
GAPDH	15.4867	15.1538	15.2173	15.3674	15.2978	15.5011
NTN3	31.7014	28.6147	31.1853	30.6243	29.9854	29.4328
NTN4	25.3273	25.2737	25.2419	26.1912	25.738	26.0848
Neo	24.4984	24.3967	24.2734	24.4293	24.27	24.3161
Average	Ad	Sph	Normalize	Ad	Sph		Relative Expression Sph/Ad			Log2FC
GAPDH	15.2859	15.3887					GAPDH
NTN3	30.5005	30.0142		15.2146	14.6254		NTN3	1.50433		0.58912
NTN4	25.281	26.0047		9.99503	10.6159		NTN4	0.650276		-0.620876
Neo	24.3895	24.3385		9.10359	8.94975		Neo	1.11253		0.153845
	Ad		Sph-1	Sph-2	Sph-3			Normalize	Ad	Sph-1	Sph-2	Sph-3	Relative Expression Sph/Ad	Sph-1	Sph-2	Sph-3	Log2FC	Sph-1	Sph-2	Sph-3
GAPDH	15.2859		15.3674	15.2978	15.5011		GAPDH						GAPDH
NTN3	30.5005		30.6243	29.9854	29.4328		NTN3		15.2146	15.257	14.6876	13.9317	NTN3	0.971041	1.44084	2.43318		-0.0423957	0.526914	1.28284
NTN4	25.281		26.1912	25.738	26.0848		NTN4		9.99503	10.8238	10.4402	10.5837	NTN4	0.562996	0.734496	0.664965		-0.828804	-0.445173	-0.58865
Neo	24.3895		24.4293	24.27	24.3161		Neo		9.10359	9.06198	8.97227	8.81499	Neo	1.02927	1.0953	1.22145		0.0416156	0.13132	0.288599
OVCAR8	Ad-1	Ad-2	Ad-3	Sph-1	Sph-2	Sph-3
GAPDH	15.1544	15.2458	15.2022	15.2037	15.002	15.614
NTN3	30.6093	31.2449	30.5939	30.1368	31.1733	30.2133
NTN4	25.2064	25.198	25.0309	25.858	25.9504	25.9045
Neo-1	24.0281	23.8017	24.018	24.5082	24.4294	24.1824
Average	Ad	Sph		Normalize Ad	Normalize Sph		Relative Expression Sph/Ad			Log2FC
GAPDH	15.2008	15.2732
NTN3	30.8161	30.5078		15.6153	15.2345			1.30202		0.380746
NTN4	25.1451	25.9043		9.94433	10.6311			0.621264		-0.686722
Neo-1	23.9493	24.3734		8.74848	9.10011			0.783701		-0.351624
							Normalize	Ad	Sph-1	Sph-2	Sph-3		Relative Expression Sph/Ad	Sph-1	Sph-2	Sph-3	Log2FC	Sph-1	Sph-2	Sph-3
			Sph-1	Sph-2	Sph-3
GAPDH	15.2008		15.2037	15.002	15.614		GAPDH						GAPDH	0.997964	1.1477	0.750964		-0.0029399	0.198751	-0.413184
NTN3	30.8161		30.1368	31.1733	30.2133		NTN3	15.6153	14.933	16.1712	14.5993		NTN3	1.60463	0.680203	2.02225		0.682237	-0.555963	1.01596
NTN4	25.1451		25.858	25.9504	25.9045		NTN4	9.94433	10.6543	10.9484	10.2905		NTN4	0.611348	0.4986	0.786662		-0.709935	-1.00405	-0.346184
Neo-1	23.9493		24.5082	24.4294	24.1824		Neo-1	8.74848	9.30447	9.4274	8.56845		Neo-1	0.680191	0.624633	1.13291		-0.555987	-0.678918	0.180033
OVCAR8	Ad-1	Ad-2	Ad-3	Sph-1	Sph-2	Sph-3	Ad-4	Ad-5	Ad-6	Sph-4	Sph-5	Sph-6
GAPDH	17.1397	16.5496	16.3529	15.0819	14.376	15.0719	16.2988	16.5181	16.4797	15.1443	15.1339	15.048
NTN4	25.9367	26.0892	25.9728	25.148	24.8973	24.7647	25.9474	25.6878	25.6674	25.0197	25.3391	24.9669
Average	Ad-1	Sph-1	Ad-2	Sph-2		Normalize	Ad-1	Sph-1	Ad-2	Sph-2
GAPDH	16.6807	14.8433	16.4322	15.1087
NTN4	25.9995	24.9367	25.7675	25.1086			9.31882	10.0934	9.33533	9.99986
Relative Expression Sph/Ad	Sph-1	Sph-2	log2FC	Sph-1	Sph-2
GAPDH
NTN4	0.584569	0.630897		-0.774554	-0.664523
Normalize GAPDH
	Ad-1	Ad-2	Sph-1	Sph-2		Ad	Sph	Normalize	Ad	Sph	Relative Expression Sph/Ad		Log2FC
GAPDH	16.6807	16.4322	14.8433	15.1087		16.5565	14.976
NTN4	25.9995	25.7675	24.9367	25.1086		25.8835	25.0226		9.32707	10.0466		0.607292	-0.719538
OVCAR8	Ad-1	Ad-2	Ad-3	Ad-4	Ad-5	Ad-6	Ad-7	Ad-8	Ad-9	Ad-10	Ad-11	Ad-12	Sph-1	Sph-2	Sph-3	Sph-4	Sph-5	Sph-6	Sph-7	Sph-8	Sph-9	Sph-10	Sph-11	Sph-12
GAPDH	15.914	16.097	16.402	16.1304	15.9561	16.9686	15.4991	16.062	15.7902	15.7213	15.9475	16.2678	16.9194	16.6153	16.8572	16.9024	16.3393	17.2378	16.9657	16.9753	16.3504	16.4358	16.7134	16.5682
Unc5B	30.2732	30.9977	30.7141	28.3822	26.9397	29.9551	30.3681	32.1854	29.4923	30.5767	30.7557	31.4581	31.162	29.8199	30.1207	30.4554	30.2303	30.1874	30.4362	29.9567	30.8413	30.0542	30.3146	30.3389
Neo-1	23.8585	23.5837	23.5508	23.9038	23.9968	24.0264	23.6358	23.6872	23.6657	23.6627	23.6843	24.1823	24.9229	24.8864	24.5436	24.5219	24.5105	24.5984	25.1092	25.2335	25.0287	24.8272	24.9734	24.8313
NTN1	27.3442	27.9084	27.4124										28.4476	28.3024	27.6762
NTN3	31.5717	33.0993	32.534										33.0227	33.2081	32.3267
Average	Ad	Sph		Normalize Ad	Normalize Sph		Relative Expression Sph/Ad			Log2FC
GAPDH	16.063	16.74								GAPDH
Unc5B	30.1749	30.3265		14.1118	13.5864			1.43934		Unc5B	0.525407
Neo-1	23.7865	24.8322		7.7235	8.09222			0.774468		Neo-1	-0.368722
NTN1	27.555	28.1421		11.492	11.402			1.06434		NTN1	0.0899638
NTN3	32.4017	32.8525		16.3387	16.1125			1.16974		NTN3	0.226194
OVCAR8	Ad-1	Ad-2	Ad-3	Ad-4	Ad-5	Ad-6	Ad-7	Ad-8	Ad-9	Ad-10	Ad-11	Ad-12	Sph-1	Sph-2	Sph-3	Sph-4	Sph-5	Sph-6	Sph-7	Sph-8	Sph-9	Sph-10	Sph-11	Sph-12
GAPDH	15.914	16.097	16.402	16.1304	15.9561	16.9686	15.4991	16.062	15.7902	15.7213	15.9475	16.2678	16.9194	16.6153	16.8572	16.9024	16.3393	17.2378	16.9657	16.9753	16.3504	16.4358	16.7134	16.5682
Unc5B	30.2732	30.9977	30.7141	28.3822	26.9397	29.9551	30.3681	32.1854	29.4923	30.5767	30.7557	31.4581	31.162	29.8199	30.1207	30.4554	30.2303	30.1874	30.4362	29.9567	30.8413	30.0542	30.3146	30.3389
Neo-1	23.8585	23.5837	23.5508	23.9038	23.9968	24.0264	23.6358	23.6872	23.6657	23.6627	23.6843	24.1823	24.9229	24.8864	24.5436	24.5219	24.5105	24.5984	25.1092	25.2335	25.0287	24.8272	24.9734	24.8313
	Ad-1-3	Ad-4-6	Ad-7-9	Ad-10-12	Sph-1-3	Sph-4-6	Sph-7-9	Sph-10-12
GAPDH	16.1377	16.3517	15.7838	15.9789	16.7973	16.8265	16.7638	16.5725
Unc5B	30.6617	28.4256	30.6819	30.9302	30.3675	30.291	30.4114	30.2359
Neo-1	23.6643	23.9757	23.6629	23.8431	24.7843	24.5436	25.1238	24.8773
Normalize
GAPDH
Unc5B	14.524	12.0739	14.8982	14.9513	13.5703	13.4645	13.6476	13.6634
Neo-1	7.52667	7.62395	7.87914	7.86424	7.98697	7.71708	8.36001	8.30483
Relative Expression Sph/Ad	Sph-1-3	Sph-4-6	Sph-7-9	Sph-10-12	Log2FC	Sph-1	Sph-4-6	Sph-7-9	Sph-10-12
GAPDH
Unc5B	1.93689	0.381412	2.37928	2.44179		0.953739	-1.39058	1.25053	1.28794
Neo-1	0.72683	0.937488	0.716546	0.736836		-0.460309	-0.0931274	-0.480869	-0.440584
OVCAR8	Ad-1	Ad-2	Ad-3	Ad-4	Ad-5	Ad-6	Ad-7	Ad-8	Ad-9	Ad-10	Ad-11	Ad-12	Sph-1	Sph-2	Sph-3	Sph-4	Sph-5	Sph-6	Sph-7	Sph-8	Sph-9	Sph-10	Sph-11	Sph-12
GAPDH	15.6959	15.4666	15.6806	15.4187	15.3863		14.9747	15.1483	14.8659	15.0384	15.0814	15.5174	16.7345	16.175	16.337	16.1546	16.2385	16.8141	16.5877	16.39	16.6245	16.0395	16.0635	16.1896
NTN1	26.3603	26.4714	26.2803	26.6779	26.4143	27.0131	26.3178	26.3875	26.4376	26.5774	26.2908	26.9036	27.7965	27.7663	27.4009	27.8288	27.4846	27.383	27.6554	27.7731	27.9252	27.5877	27.4195	27.5913
NTN3	30.8655	29.2716	30.3935	29.3758	30.312	30.6552	28.7245	29.0507	29.2258	31.2549	30.7853	28.7576	31.2014	31.6548	29.1057	32.0641	32.1985	29.7687	30.755	32.9774	32.1163		31.6875	31.6416
Average	Ad	Sph		Normalize	Ad	Sph		Relative ExpressionSph/Ad			Log2FC
GAPDH	15.2977	16.3624
NTN1	26.511	27.6344			11.2133	11.272			0.960162		-0.0586501
NTN3	29.8894	31.3792			14.5917	15.0168			0.744789		-0.425097
OVCAR8	OV8 AD	OV8 AD	OV8 AD	OV8 Sph	OV8 Sph	OV8 Sph
GAPDH	16.523	15.7436	15.7623	13.7799	13.5857	14.1804
NTN4	25.4505	25.2557	24.873	24.0159	24.1764	24.0803
NTN5	34.1083	34.8223	36.0589	30.8177	30.8395	31.6499
Neo	24.1137	24.2617	23.7363	23.4814	23.1129	22.8655
DCC I	34.8041	35.2539		33.5442	33.5172	34.561
DCC II	34.1883	34.3864	34.1983	34.0058	34.3472	34.5319
DAPK1	22.9199	22.2121	22.6995	22.6317	22.6085	22.48
OVCAR8
Average	OV8 AD	OV8 Sph
GAPDH	16.0096	13.8487
NTN4	25.193	24.0909
NTN5	34.9965	31.1023
Neo	24.0372	23.1533
DCC I	35.029	33.8741
DCC II	34.2576	34.295
DAPK1	22.6105	22.5734
Normalize
NTN4	9.1834	10.2422
NTN5	18.9869	17.2536
Neo	8.02757	9.30456
DCC I	19.0194	20.0254
DCC II	18.248	20.4463
DAPK1	6.60089	8.72468
D Sph/Ad	OV8
NTN4	0.480039
NTN5	3.32473
Neo	0.412658
DCC I	0.497911
DCC II	0.217901
DAPK1	0.229443
Log2 FC
NTN4	-1.05878
NTN5	1.73324
Neo	-1.27698
DCC 1	-1.00604
DCC 2	-2.19826
DAPK1	-2.12379
OVCAR8	OV8 Ad	OV8 Ad	OV8 Ad	OV8 Sph	OV8 Sph	OV8 Sph
GAPDH	15.7023	15.651	15.8154	15.3703	15.3947	15.4333
Unc5B	33.8776	33.3213	32.8311	30.6987	31.3466	32.0184
Unc5B II	34.9069	32.6293	32.8608	31.6485	31.3905	32.0611
Unc5C I			33.8523		33.1097
Unc5C II	28.3916	28.9295	29.4581	29.2377	28.8972	29.5762
Unc5C III			37.4619	39.7117	34.1567	33.3607
									Relative Expression Sph/Ad				Log2FC
	Ad		Normalize Ad		Normalize Sph-1	Normalize Sph-2	Normalize Sph-3		Sph-1	Sph-2	Sph-3		Sph-1	Sph-2	Sph-3
GAPDH	15.7229											GAPDH
Unc5B	33.3433		17.6204		15.3284	15.9519	16.5851		4.89746	3.17889	2.04962	Unc5B	2.29203	1.66852	1.03535
Unc5BII	33.4657		17.7427		16.2782	15.9958	16.6278		2.75984	3.35649	2.16592	Unc5BII	1.46459	1.74696	1.11498
Unc5C I	33.8523		18.1294			17.715				1.33276		Unc5C I		0.414421
Unc5C II	28.9264		13.2035		13.8674	13.5025	14.1429		0.631179	0.812809	0.521446	Unc5C II	-0.663879	-0.299012	-0.93941
Unc5C III	37.4619		21.739		24.3414	18.762	17.9274		0.164672	7.87349	14.0418	Unc5C III	-2.60233	2.977	3.81166
	Normalize Ad		Sph	Normalize Sph	Relative Expression Sph/Ad	Log2FC
GAPDH			15.3994
Unc5B	17.6204		31.3546	15.9551	3.1718	1.6653
Unc5BII	17.7427		31.7	16.3006	2.7173	1.44217
Unc5C I	18.1294		33.1097	17.7102	1.33718	0.419193
Unc5C II	13.2035		29.237	13.8376	0.644343	-0.6341
Unc5C III	21.739		35.743	20.3436	2.63069	1.39544
OVCAR8	OV8 Ad-1	OV8 Ad-1	OV8 Ad-1	OV8 Sph-1	OV8 Sph-1	OV8 Sph-1		OV8 Ad-2	OV8 Ad-2	OV8 Ad-2	OV8 Sph-2	OV8 Sph-2	OV8 Sph-2
GAPDH	16.5347	16.3797	16.1754	15.2932	15.099	15.548		16.248	16.5815	16.1583	15.3471	15.267	15.6777
Unc5A	29.8702	29.4644	30.0733	27.9526	28.1425	28.2175		29.4115	29.255	29.1864	28.3689	27.8224	28.07
Unc5D	30.0692	30.0663	29.6549	29.6346	29.1335	29.4262		29.4649	29.4735	30.2481	29.1941	29.7354	29.7933
DSCAM	31.2801	31.9601	32.0593	31.1616	31.0839	30.5901		31.766	30.6834	31.9769	30.9982	31.0339	31.1616
	Average Ad-1	Average Ad-2	Average Sph-1	Average Sph-2
GAPDH	16.3632	16.3293	15.3134	15.4306
Unc5A	29.8026	29.2843	28.1042	28.0871
Unc5D	29.9301	29.7289	29.3981	29.5743
DSCAM	31.7665	31.4754	30.9452	31.0646
	Normalize Ad-1	Normalize Ad-2	Normalize Sph-1	Normalize Sph-2
GAPDH
Unc5A	13.4394	12.955	12.7908	12.6565
Unc5D	13.5669	13.3996	14.0847	14.1436
DSCAM	15.4033	15.1462	15.6318	15.634
	Relative Expression Sph/Ad-1	Relative Expression Sph/Ad-2	Log2FC-1	Log2FC-2
GAPDH
Unc5A	1.56761	1.2299	0.648564	0.298545
Unc5D	0.698423	0.597058	-0.517826	-0.744056
DSCAM	0.853495	0.713113	-0.228546	-0.487797
OVCAR8	OV8 Ad	OV8 Ad	OV8 Ad	OV8 Sph	OV8 Sph	OV8 Sph
GAPDH	16.5382	16.9464	16.6632	14.9585	15.0021	15.5625
Unc5A	29.7799	30.2195	30.0914	27.135	28.4125	28.4068
Unc5B	32.4011	34.3695	34.7341	32.0834	31.3849	31.3612
Unc5C	33.7574	33.5216	34.2236	32.493	33.2169	32.4334
Unc5D	33.4946	33.0859	35.1818	32.2915	32.2756	32.3602
Neo	25.0243	24.7307	24.802	23.9893	23.9129	23.8459
	Ad	Sph		Normalize	Ad	Sph	Relative Expression Sph/Ad		Log2FC
GAPDH	16.7159	15.1744
Unc5A	30.0303	27.9847			13.3144	12.8104		1.41812	0.503977
Unc5B	33.8349	31.6098			17.119	16.4355		1.60608	0.683541
Unc5C	33.8342	32.7144			17.1183	17.5401		0.74649	-0.421805
Unc5D	33.9208	32.3091			17.2048	17.1347		1.04979	0.0701062
Neo	24.8523	23.9161			8.1364	8.74169		0.65734	-0.605288
OVCAR8	Ad-1	Ad-2	Ad-3	Sph-1	Sph-2	Sph-3	Sph-4	Sph-5	Sph-6	Sph-7	Sph-8
	14.1927	14.1746		13.6503	14.189	14.0863	13.7819
	31.8327	31.1129	31.8675	30.358	30.6384	30.6877	30.9282	31.0084	30.3837	31.1127	29.9654
	Ad	Normalize		Normalize
GAPDH	14.1837
Unc5D	31.6043	17.4207		16.7078	16.4494	16.6015	17.1463	17.0815	16.4569	17.1858	16.0385
	Relative Expression Sph/Ad
	Unc5D			1.6391	1.96056	1.76442	1.20945	1.26502	1.95045	1.17675	2.60656
	Log2FC
	Unc5D			0.712902	0.971267	0.819191	0.274354	0.339156	0.963806	0.234809	1.38215
OVCAR8	Ad	Sph		Normalize Ad	Sph		Relative Expression Sph/Ad	Log2FC
GAPDH	14.1837	13.9269
Unc5D	31.6043	30.6353		17.4207	16.7085		1.63831	0.712204
OVCAR8	Ad-1	Ad-2	Ad-3	Ad-4	Sph-1	Sph-2	Sph-3	Sph-4
GAPDH	14.6099	14.7351			13.6396	14.4497	14.0992	14.5018
Unc5C	31.4387	32.697			31.3589	32.3283	31.5203	33.1028
DCC	34.5524	32.1453			34.679	35.0605	33.2839	34.5809
DSCAM	33.0013	30.858			34.0395	35.8342	33.3103	34.1253
	Average Ad	Average Sph		Normalize	Ad	Sph
GAPDH	14.6725	14.1726
Unc5C	32.0679	32.0776			17.3954	17.905
DCC	33.3489	34.4011			18.6764	20.2285
DSCAM	31.9296	34.3274			17.2572	20.1548
				Relative Expression Sph/Ad
					Unc5C	0.702418
					DCC	0.341015
					DSCAM	0.134194
				Log2FC
					Unc5C	-0.509598
					DCC	-1.55209
					DSCAM	-2.8976
OVCAR8	Ad-1	Ad-2	Ad-3	Ad-4	Sph-1	Sph-2	Sph-3	Sph-4
GAPDH	15.1438	15.0374			16.8365	16.3516	15.721	15.447
NTN4	25.0302	25.0491			25.7609	25.8972	25.282	25.2314
NTN5	34.201	33.0654			34.2246	36.0836	33.5146	32.2274
	Average Ad	Normalize Ad		Average Sph		Normalize Sph	Relative Expression Sph/Ad
GAPDH	15.0906				16.089
NTN4	25.0397	9.94903			25.5429	9.45382		1.40952
NTN5	33.6332	18.5426			34.0125	17.9235		1.53588
							Log2FC
							GAPDH
							NTN4	0.495209
							NTN5	0.619064
OVCAR8	Ad-1	Ad-2			Sph-1	Sph-2	Sph-3	Sph-4
GAPDH	15.4655	15.4378			16.8858	16.6838	16.1422	15.9934
NTN5	33.475	33.5985			34.4579	34.6232	33.3694	33.5523
DSCAM	34.4664							34.2153
Neo-1	24.1819	24.2344			24.3652	24.754	24.0673	24.0799
Average	Ad	Sph	Normalize Ad	Normalize Sph	Relative Expression Sph/Ad	Log2FC
GAPDH	15.4516	16.4263
NTN5	33.5367	34.0007	18.0851	17.5744	1.42477	0.510727
DSCAM	34.4664	34.2153	19.0147	17.789	2.33881	1.22577
Neo-1	24.2081	24.3166	8.75651	7.89031	1.82285	0.8662
OVCAR8	Ad-1	Ad-2	Sph-1	Sph-2	Sph-3	Sph-4
GAPDH	14.2833	14.4589	16.0503	15.6928	15.2299	15.0931
NTN1	27.2957	27.2789	27.4524	27.5077	26.8804	26.8816
NTN3	33.4634	32.2439	32.2847	32.3007	31.796	31.3462
Unc5A	29.6302	29.9134	28.3286	28.5057	27.899	27.6426
Unc5B	33.5784	34.5637	31.7801	31.1088	31.1173	30.9129
	Ad	Sph	Normalize Ad	Normalize Sph	Relative Expression Sph/Ad	Log2FC
GAPDH	14.3711	15.5166
NTN1	27.2873	27.1805	12.9162	11.664	2.38212	1.25225
NTN3	32.8536	31.9319	18.4825	16.4154	4.19069	2.06719
Unc5A	29.7718	28.094	15.4007	12.5774	7.07762	2.82326
Unc5B	34.0711	31.2298	19.7	15.7132	15.8537	3.98675
OVCAR8	OV8 Ad	OV8 Ad	OV8 Ad	OV8 Sph	OV8 Sph	OV8 Sph
	GAPDH	GAPDH	GAPDH	GAPDH	GAPDH	GAPDH
GAPDH	15.63	16.045	15.7617	14.7947	14.8355	15.3703
	Unc5C	Unc5C	Unc5C	Unc5C	Unc5C	Unc5C
Unc5C	31.0331	30.5437	30.9077	30.0803	30.5113	30.7778
	Unc5C	Unc5C	Unc5C	Unc5C	Unc5C	Unc5C
Unc5C	30.6668	31.012	30.4292	30.0859	30.1084	30.3277
	Unc5C	Unc5C	Unc5C	Unc5C	Unc5C	Unc5C
Unc5C	30.9234	30.2665	30.6961	30.1194	30.2625	30.7959
	DSCAM	DSCAM	DSCAM	DSCAM	DSCAM	DSCAM
DSCAM	31.7331	32.021	32.1389	35.0848	33.163	33.3154
	DSCAM	DSCAM	DSCAM	DSCAM	DSCAM	DSCAM
DSCAM	33.1403	34.9312	32.2581	34.9778		34.9316
	Unc5A	Unc5A	Unc5A	Unc5A	Unc5A	Unc5A
Unc5A	28.7275	29.0875	28.8528	27.6049	27.6731	28.0027
	Unc5A	Unc5A	Unc5A	Unc5A	Unc5A	Unc5A
Unc5A	29.4708	29.2446	29.0514	27.899	27.8276	28.5097
	Ad	Sph		Normalize	Ad	Sph		Relative Expression Sph/Ad		Log2FC
GAPDH	15.8122	15.0002
Unc5C	30.8282	30.4565			5.62176	5.25844			1.28638	0.363318
Unc5C II	30.7026	30.174			5.49623	4.97599			1.43419	0.520238
Unc5C III	30.6287	30.3926			5.42226	5.1946			1.17094	0.227662
DSCAM	31.9644	33.8544			6.75793	8.65636			0.268235	-1.89843
DSCAM II	33.4432	34.9547			8.23681	9.75671			0.348711	-1.5199
Unc5A	28.8893	27.7602			3.68286	2.56221			2.17445	1.12065
Unc5A II	29.2556	28.0788			4.04919	2.88075			2.24769	1.16844
Unc5C	30.7198	30.341			5.51341	5.14301			1.29272	0.370406
DSCAM	32.7038	34.4046			7.49737	9.20654			0.305837	-1.70916
Unc5A	29.0724	27.9195			3.86602	2.72148			2.21076	1.14455
OVCAR8	Ad	Ad	Ad	Sph	Sph	Sph
GAPDH	16.0067	16.2607	16.3056	15.0541	15.4828	15.8281
Unc5A	29.3276	29.0794	29.0778	28.4514	27.9289	28.2531
Unc5C	30.8359	31.2426	31.4064	30.7194	30.6756	30.9723
DSCAM	31.4216	31.4422	31.0129	32.3659	32.2157	31.4564
NTN1	28.1316	28.5881	28.3082	27.68	27.6133	28.1542
	Ad	Sph		Normalize	Ad	Sph		Relative Expression Sph/Ad		Log2FC
GAPDH	16.191	15.455
Unc5A	29.1616	28.2111			29.1616	28.2111			1.93248	0.950452
Unc5C	31.1616	30.7891			31.1616	30.7891			1.29458	0.37248
DSCAM	31.2922	32.0127			31.2922	32.0127			0.606907	-0.720452
NTN1	28.3426	27.8159			28.3426	27.8159			1.44071	0.526782
OVCAR8
GAPDH	16.1491	16.2953	16.1074	15.475	15.2959
Unc5B	33.0762	34.0216	32.9532	31.6906	30.662	32.4382
	Average Ad	Sph		Normalize Ad	Sph	Relative Expression Sph/Ad		Log2FC
GAPDH	16.1839	15.3854
Unc5B	33.3503	31.5969		17.1664	16.2115		1.93845	0.954906
