# Supplementary material for: Netrin signaling mediates survival of dormant epithelial ovarian cancer cells
Source: eLife. 2024 Jul 18;12:RP91766. doi: 10.7554/eLife.91766 (PMC11257678; doi:10.7554/eLife.91766)
Supplement: Figure 5—figure supplement 1—source data 1. [file elife-91766-fig5-figsupp1-data1.xlsx]

## Sheet: Sheet1
OV8	OV8	OV8	OV8	DDN	DDN	DDN
GAPDH	15.1355	14.9343	14.6991	14.3179	14.492	14.9837
DSCAM I	34.0849		32.8407	33.6717	34.7312
DSCAM I	33.2136	34.5844	34.446	32.7935	34.2892	35.1011
DSCAM I	33.7407	35.262	34.0672	34.7384
	OV8	DDN KO		Normalize	OV8	DDN KO	Relative Expression		Log2FC
GAPDH	14.923	14.5979
DSCAM I	33.4628	34.2015			18.5398	19.6036		0.478371	-1.0638
DSCAM I	34.0813	34.0612			19.1584	19.4634		0.809445	-0.304995
DSCAM I	34.3567	34.7384			19.4337	20.1406		0.612639	-0.706891
OV8	OV8	OV8	OV8	DDN	DDN	DDN
GAPDH	14.6795	14.4696	14.6535	14.3412	14.7754	15.0339
DSCAM I	33.6954	34.079	32.6328	34.6147	34.6751
DSCAM I	33.3405	34.8965	34.2658			34.744
	OV8	DDN KO		Normalize	OV8	DDN KO	Relative Expression		Log2FC
GAPDH	14.6008	14.7168
DSCAM I	33.469	34.6449			18.8682	19.928		0.47969	-1.05983
DSCAM I	34.1676	34.744			19.5668	20.0272		0.726772	-0.460425
OV8	OV8	OV8	OV8	Unc5 KO	Unc5 KO	Unc5 KO	NTN3			NTN1			DDN
GAPDH	15.4538	15.1164	15.2301	15.2048	14.601	14.462	14.6008	14.7113	14.7746	14.7006	14.6268	14.6197	15.1983	14.3432	14.6432
Unc5A	27.8024	27.5197	28.5016	29.0441	28.314	28.9138
Unc5B	31.935	32.4683	32.9722	33.0515	31.4989	32.6155
Unc5C	35.7563	34.1519	33.8561	35.6875	35.0157	33.2379
Unc5D	30.5091	30.3713	31.0105	30.3671	30.2221	30.8778
NTN3	30.1307	29.704	30.3254				30.3136	31.0212	31.1302
NTN1	28.0015	27.8341	28.1328							28.841	28.6341	29.2152
DCC	30.5091	30.3713	31.0105										35.0096	33.8625	34.3155
Neo	23.9296	23.8113	23.4552										24.1247	24.0741	24.2723
Average Cq	OV8	Unc5 KO	NTN3	NTN1	DDN	Normalize	OV8	Unc5 KO	NTN3	NTN1	DDN	Relative Expression	Unc5 KO	NTN3	NTN1	DDN	Log2FC
GAPDH	15.2667	14.7559	14.6956	14.6491	14.7282
Unc5A	27.9413	28.7573					12.6745	14.0014					0.398632				-1.32687
Unc5B	32.4585	32.3886					17.1917	17.6327					0.736639				-0.440971
Unc5C	34.5881	34.647					19.3214	19.8911					0.673738				-0.56974
Unc5D	30.6303	30.489					15.3635	15.7331					0.774045				-0.369511
NTN3	30.0534		30.8217				14.7866		16.1261					0.395166			-1.33947
NTN1	27.9895			28.8968			12.7227			14.2477					0.347484		-1.52498
DCC	30.6303				34.3958		15.3635				19.6676					0.0506225	-4.30408
Neo	23.732				24.1571		8.4653				9.42884					0.512798	-0.963539
Normalize		Unc5 KO	Unc5 KO	Unc5 KO	NTN3
Unc5A	12.6745	13.8393	13.713	14.4518
Unc5B	17.1917	17.8467	16.8979	18.1535
Unc5C	19.3214	20.4827	20.4148	18.7759
Unc5D	15.3635	15.1623	15.6211	16.4158
NTN3	14.7866				15.7128	16.3099	16.3556
NTN1	12.7227							14.1404	14.0072	14.5955
DCC	15.3635										19.8113	19.5193	19.6723
Neo	8.4653										8.92645	9.73092	9.62914
Relative Expression	Unc5 KO	Unc5 KO	Unc5 KO
Unc5A	0.446021	0.486836	0.291729
Unc5B	0.635074	1.22588	0.513442
Unc5C	0.447106	0.468658	1.45951
Unc5D	1.1497	0.836488	0.48223
NTN3				0.526247	0.33704	0.347909
NTN1							0.37431	0.41052	0.273048
DCC										0.0458248	0.0561046	0.0504582
Neo										0.726406	0.41592	0.446322
Log2FC
Unc5A	-1.16482	-1.03849	-1.7773
Unc5B	-0.655002	0.293816	-0.961726
Unc5C	-1.16131	-1.09339	0.545486
Unc5D	0.201257	-0.257583	-1.05221
NTN3	-1.56901	-1.52322	-0.926187
NTN1	-1.41769	-1.28448	-1.87277
DCC	-4.44773	-4.15574	-4.30877
Neo	-0.461152	-1.26562	-1.16384
OV8	OV8	OV8	OV8	Unc5 KO	Unc5 KO	Unc5 KO	DDN	DDN	DDN	NTN1	NTN1	NTN1			NTN3	NTN3	NTN3
GAPDH	16.0317	15.4161	15.4876	15.0383	14.8292	14.6564	14.8967	15.0357	14.5325	16.2498	16.4521	16.5793		GAPDH	14.54	14.8286	14.8037
Unc5A	28.4584	28.2093	28.0412	28.598	28.1345	28.349
Unc5C	34.747	34.4247		35.5419		34.3205
Unc5D	31.3961	31.6166	31.2118	32.2423	31.8749	31.7491
Unc5C PS2	32.4442	32.17	31.5699	33.8021	33.3486	33.2752
Unc5D PS2	32.1276	31.8979	31.9124	32.5842	32.9562	32.0097
NTN1	28.0015	27.8341	28.1328							28.4877	28.7787	29.695
DCC	30.5091	30.3713	31.0105				33.1662	32.2552	32.413
Neo	23.9296	23.8113	23.4552				23.9626	23.5145	23.7807
NTN3	30.1307	29.704	30.3254											NTN3	32.3893	31.8932	29.7619
Average	OV8	Unc5 KO	DDN	NTN1	NTN3
GAPDH	15.6451	14.8413	14.8216	16.4271	14.7241
Unc5A	28.2363	28.3605
Unc5C	34.5859	34.9312
Unc5D	31.4081	31.9555
Unc5C PS2	32.0614	33.4753
Unc5D PS2	31.9793	32.5167
NTN1	27.9895			28.9871
DCC	30.6303		32.6115
Neo	23.732		23.7526
NTN3	30.0534				31.3481
Normalize						Relative Expression	Unc5 KO	DDN	NTN1	NTN3
GAPDH
Unc5A	12.5912	13.5192					0.525574
Unc5C	18.9408	20.0899					0.450903
Unc5D	15.763	17.1142					0.391983
Unc5C PS2	16.4163	18.634					0.214974
Unc5D PS2	16.3342	17.6754					0.394677
NTN1	12.3444			12.5601					0.861127
DCC	14.9852		17.7898					0.143123
Neo	8.08692		8.93098					0.557073
NTN3	14.4083				16.624					0.215269
	Log2FC
GAPDH
Unc5A	-0.928034
Unc5C	-1.14911
Unc5D	-1.35114
Unc5C PS2	-2.21777
Unc5D PS2	-1.34126
NTN1	-0.215702
DCC	-2.80467
Neo	-0.844061
NTN3	-2.21579
OV8	OV8	OV8	OV8	Unc5 KO	Unc5 KO	Unc5 KO
GAPDH	15.1281	14.7027	15.0151	14.2584	14.5518	14.6549
UNC5B	31.1765	31.7777	32.2545	32.0368	32.1396	31.8047
Average Cq	OV8	Unc5 KO		Normalize	OV8	Unc5 KO		Relative Expression	Unc5 KO	Log2 FC
GAPDH	14.9486	14.4884
Unc5B	31.7362	31.9937			16.7876	17.5054			0.608033	-0.717778
		Unc5 KO	Unc5 KO	Unc5 KO		Relative Expression	Unc5 KO	Unc5 KO	Unc5 KO		Log2 FC	Unc5 KO	Unc5 KO	Unc5 KO
GAPDH
Unc5B		17.7784	17.5879	17.1498			0.503195	0.57424	0.777952			-0.990812	-0.800275	-0.362247
OV8	OV8	OV8	OV8	NTN3	NTN3	NTN3
GAPDH	15.3264	14.8122	14.5551	14.54	14.8286	14.8037
NTN3	30.9861	30.524	30.8032	31.7934	31.689	31.8307
Average Cq	OV8			NTN3		Normalize	OV8	NTN3	Relative Expression	NTN3	Log2FC
GAPDH	14.8979			14.7241
NTN3	30.7711			31.7711			15.8732	17.047		0.443253	-1.1738
OV8	OV8	OV8	OV8	NTN1	NTN1	NTN1	NTN3	NTN3	NTN3	Unc5 KO	Unc5 KO	Unc5 KO	DDN	DDN	DDN
GAPDH	15.9601	15.8099	15.3584	14.7006	14.6268	14.6197	14.6008	14.7113	14.7746	15.084	14.9771	15.0494	15.1983	14.3432	14.6432
NTN1	28.0015	27.8341	28.1328	28.841	28.6341	29.2152
NTN3	29.1808	29.7046	26.4304				32.3893	31.8932	29.7619
Unc5A	27.8024	27.5197	28.5016							29.0441	28.314	28.9138
Unc5B	32.7912	31.2856	32.1661							33.9847	33.2842	35.0064
Unc5C	35.2401	32.3476	33.9503							35.6875	35.0157	33.2379
Unc5D	28.7732	28.6932	28.7539							30.3671	30.2221	30.8778
DCC	30.5091	30.3713	31.0105										35.0096	33.8625	34.3155
Neo	23.9296	23.8113	23.4552										24.1247	24.0741	24.2723
Average Cq	OV8	NTN1 KO	NTN3 KO	Unc5 KO	DDN
GAPDH	15.7095	14.6491	14.6956	15.0368	14.7282
NTN1	27.9895	28.8968
NTN3	28.4386		31.3481
Unc5A	27.9413			28.7573
Unc5B	32.081			34.0918
Unc5C	33.846			34.647
Unc5D	28.7401			30.489
DCC	30.6303				34.3958
Neo	23.732				24.1571
Normalize	OV8	NTN1 KO	NTN3			Relative Expression	NTN1	NTN3	Unc5 KO	DDN	Log2FC	NTN1	NTN3	Unc5 KO	DDN
NTN1	12.28	14.2477					0.255658					-1.96771
NTN3	12.7292		16.6526					0.0659085					-3.92339
Unc5A	12.2318			13.7205					0.356338					-1.48868
Unc5B	16.3715			19.055					0.155669					-2.68344
Unc5C	18.1366			19.6102					0.360069					-1.47365
Unc5D	13.0306			15.4521					0.186657					-2.42154
DCC	14.9208				19.6676					0.0372451					-4.74681
Neo	8.02257				9.42884					0.377286					-1.40627
OV8	OV8	OV8	OV8	NTN1	NTN1	NTN1	NTN3	NTN3	NTN3
GAPDH	15.3348	14.4512	14.47	14.4022	14.2271	14.3923	14.54	14.8286	14.8037
NTN1	27.6911	27.4283	27.667	28.4877	28.7787	29.695
NTN1	27.5129	27.3284	27.0426
NTN3	31.2183	31.2166	30.3116				32.3893	31.8932	29.7619
NTN3	31.0711	31.5057	30.585
Average	OV8	OV8		NTN1	NTN3		Normalize	OV8	NTN1	NTN3		Relative Expression	NTN1	NTN3	Log2FC
GAPDH	14.752			14.3405	14.7241
NTN1	27.5955	27.445		28.9871				12.6931	14.6466				0.258186		-1.95352
NTN1	27.2946
NTN3	30.9155	30.9847			31.3481			16.2327		16.624				0.762423	-0.391336
NTN3	31.0539
OV8	OV8	OV8	OV8	Unc5 KO	Unc5 KO	Unc5 KO
GAPDH	14.4483	14.977	14.2423	14.096	13.9783	13.6569
Unc5A	28.1792	28.0155	27.6484	28.0785	28.2055	28.1881
Unc5A-2	28.0382	27.5349	27.8878	28.0436	28.0079	27.7047
Unc5B	31.5328	32.0251	31.6136	32.3381	32.0879	32.1949
Unc5B-2	31.037	31.8766	30.8705	32.1846	31.9817	31.5794
Unc5C	32.9204	31.6501	31.929	35.4925	32.402	33.1138
Unc5C-2	33.1142	31.5897	33.4042	32.2449	33.5184	33.226
Unc5D	31.3245	30.7776	31.3346	31.3309	31.689	32.0563
Average	OV8	Unc5 KO		Normalize	OV8	Unc5 KO		Relative Expression		Log2FC
GAPDH	14.5559	13.9104
Unc5A	27.9477	28.1574		Unc5A	13.3918	14.247		Unc5A	0.552812	-0.855139
Unc5A-2	27.8203	27.9188		Unc5A-2	13.2644	14.0083		Unc5A-2	0.597121	-0.743904
Unc5B	31.7238	32.207		Unc5B	17.168	18.2966		Unc5B	0.457353	-1.12862
Unc5B-2	31.2614	31.9152		Unc5B-2	16.7055	18.0048		Unc5B-2	0.406315	-1.29933
Unc5C	32.1665	33.6694		Unc5C	17.6106	19.759		Unc5C	0.225565	-2.14839
Unc5C-2	32.7027	32.9965		Unc5C2	18.1468	19.086		Unc5C-2	0.521525	-0.939193
Unc5D	31.1456	31.6921		Unc5D	16.5897	17.7816		Unc5D	0.437711	-1.19195
Average	OV8	Unc5 KO		Normalize	OV8	Unc5 KO		Relative Expression		Log2FC
Unc5A	27.884	28.0381			13.3281	14.1277			0.57454	-0.799522
Unc5B	31.4926	32.0611			16.9367	18.1507			0.431079	-1.21397
Unc5C	32.4346	33.3329			17.8787	19.4225			0.342983	-1.54379
OV8	OV8	Unc5 KO	DDN	NTN1 KO
GAPDH	15.7095	15.4366	14.7282	14.6491
NTN1	27.9895			28.8968
Unc5A	27.9413	28.7573
Unc5B	32.081	34.0918
Unc5C	33.846	34.647
Unc5D	28.7401	30.489
DCC	30.6303		34.3958
Neo-1	23.732		24.1571
Normalize	OV8	Unc5KO	DDN	NTN1 KO		Relative Expression	Unc5 KO	DDN	NTN1 KO		Log2FC
GAPDH
NTN1	12.28			14.2477					0.255658		-1.96771
Unc5A	12.2318	13.3207					0.470097				-1.08897
Unc5B	16.3715	18.6552					0.205366				-2.28373
Unc5C	18.1366	19.2105					0.47502				-1.07394
Unc5D	13.0306	15.0524					0.246246				-2.02183
DCC	14.9208		19.6676					0.0372451			-4.74681
Neo-1	8.02257		9.42884					0.377286			-1.40627
OV8	OV8	Unc5 KO	DDN KO	NTN1 KO
GAPDH	16.1022	15.8655	15.2233	15.1347
NTN1	28.4698			29.3266
Unc5A	28.4772	29.1753
Unc5B	32.5681	34.4789
Unc5C	34.4348	35.0871
Unc5D	29.1755	31.0559
DCC	31.1633		34.7809
Neo-1	24.2004		24.5553
	OV8	Unc5 KO	DDN KO	NTN1 KO		Relative Expression	Unc5 KO	DDN KO	NTN1 KO		Log2 FC
GAPDH
NTN1	12.3675			14.1918					0.282377		-1.82431
Unc5A	12.375	13.3098					0.523124				-0.934775
Unc5B	16.4659	18.6134					0.225701				-2.14752
Unc5C	18.3325	19.2216					0.539961				-0.889073
Unc5D	13.0733	15.1904					0.230507				-2.11712
DCC	15.0611		19.5576					0.0443001			-4.49655
Neo-1	8.09814		9.33197					0.425185			-1.23384
OV8	OV8	Unc5 KO
GAPDH	14.8224	13.8187
Unc5A	27.9412	27.3999
Unc5C	29.8202	31.0197
Normalize	OV8	Unc5 KO	Relative Expression	Unc5 KO	Log2FC
GAPDH
Unc5A	13.1188	13.5812		0.725814	-0.462328
Unc5C	14.9979	17.2009		0.217175	-2.20307
