# Supplementary material for: Netrin signaling mediates survival of dormant epithelial ovarian cancer cells
Source: eLife. 2024 Jul 18;12:RP91766. doi: 10.7554/eLife.91766 (PMC11257678; doi:10.7554/eLife.91766)
Supplement: Figure 5—source data 1. [file elife-91766-fig5-data1.xlsx]

## Sheet: OVCAR8
Figure 5B-Source Data 1: data for heatmap in Figure 5B
	Control	NTN1	DCC	UNC5A	UNC5B	UNC5C	Control2	NTN4	NTNG1	NTNG1:G2	Control3	NTN3	NTN5	NTNG2	Control4	DDN	UNC5 KO	Control5	UNC5D	Control6	FAK	DSCAM
1	2.15351	2.704	2.35772	2.60605	2.81856	2.6099	0.883	0.868	0.381	0.135	0.72	0.211	0.96	0.513	0.701	0.387	0.232	0.74	1.102	0.334	0.225	0.561
2	2.3805	2.80421	2.70789	2.80003	2.79836	2.63937	0.58	0.808	0.622	0.1083	0.764	0.253	0.94	0.71	0.881	0.326	0.227	1.002	1.097	0.337	0.259	0.578
3	2.28125	2.75659	2.5177	2.77909	2.76	2.58	0.783	0.596	0.655	0.134	0.67	0.222	0.965	0.775	1.02	0.312	0.185	1.093	0.967	0.367	0.249	0.4014
Average	2.27175	2.75493	2.52777	2.72839	2.79231	2.60976	0.748667	0.757333	0.552667	0.125767	0.718	0.228667	0.955	0.666	0.867333	0.341667	0.214667	0.945	1.05533	0.346	0.244333	0.513467
Normalized	1	1.21269	1.1127	1.20101	1.22914	1.14879	1	1.01158	0.738201	0.167988	1	0.318477	1.33008	0.927577	1	0.393928	0.247502	1	1.11675	1	0.706166	1.48401
SD	0.0929114	0.040928	0.143134	0.0869274	0.0242883	0.02424	0.126059	0.11668	0.122132	0.0123575	0.0384014	0.0177826	0.0108012	0.111394	0.130589	0.0325611	0.0210766	0.149642	0.0624944	0.0148997	0.0142673	0.0795464
Variance	0.0129488						0.0238363	0.0204213	0.0223743	0.000229063	0.002212	0.000474333	0.000175	0.018613	0.0255803	0.00159033	0.000666333	0.033589	0.00585833	0.000333	0.000305333	0.00949145
p value( one way ANOVA)									0.0221	< 0.0001		< 0.0001		0.5322		< 0.0001	< 0.0001				0.2248
p value (paired T-test)									0.34685	0.0164216		0.00178037		0.585382		0.0444451	0.0252197				0.00222802		UNC5B						UNC5C
																							Normalize	SD	N	p value(one way ANOVA)			Normalize	SD	N	p value(one way ANOVA)
	Control				NTN1						DCC						UNC5A						1.22914	0.0242883	3				1.14879	0.02424	3
	Normalize	SD	N		Normalize	SD	N	p value(one way ANOVA)			Normalize	SD	N	p value(one way ANOVA)			Normalize	SD	N	p value(one way ANOVA)
	1	0.0929114	3		1.21269	0.040928	3				1.1127	0.143134	3				1.20101	0.0869274	3
	Control2				NTN4					NTNG1					NTNG1:G2
	Normalize	SD	N		Normalize	SD	N	p value(one way ANOVA)		Normalize	SD	N	p value(one way ANOVA)		Normalize	SD	N	p value(one way ANOVA)
	1	0.126059	3		1.01158	0.11668	3			0.738201	0.122132	3	0.0221		0.125767	0.0123575	3	< 0.0001
	Control3				NTN3					NTN5					NTNG2
	Normalize	SD	N		Normailze	SD	N	p value(one way ANOVA)		Normalize	SD	N	p value(one way ANOVA)		Normalize	SD	N	p value(one way ANOVA)
	1	0.0384014	3		0.318477	0.0177826	3	< 0.0001		1.33008	0.0108012	3			0.927577	0.111394	3	0.5322
	Control4				DDN					UNC5KO
	Normalize	SD	N		Normalize	SD	N	p value(one way ANOVA)		Normalize	SD	N	p value(one way ANOVA)
	1	0.130589	3		0.393928	0.0325611	3	< 0.0001		0.247502	0.0210766	3	< 0.0001
	Control5				UNC5D			p value(one way ANOVA)
	Normalize	SD	N		Normalize	SD	N
	1	0.149642	3		1.11675	0.0624944	3
	Control6				FAK					DSCAM
	Normalize	SD	N		Normalize	SD	N	p value(one way ANOVA)		Normalize	SD	N	p value(one way ANOVA)
	1	0.0148997	3		0.706166	0.0142673	3	0.2248		1.48401	0.0795464	3

## Sheet: OVCAR3
	Control	NTN1	DCC	Control2	UNC5A	UNC5B	Control3	UNC5C	UNC5D	Control4	NTN3	NTN5	Control5	NTN4	NTNG1	Control6	NTNG2	Control7	FAK	Control8	DSCAM	Control9	NTNG1:G2
1	0.743739	0.59908	0.748894	1.193	0.568	0.465	2.002	0.599	0.831	0.368	0.423	0.397	0.834	0.207	0.157	1.047	0.997	0.733	0.298	0.509	0.249	0.908	0.177
2	0.809091	0.672857	0.974558	0.864	0.408	0.329	2.541	0.677	0.837	0.584	0.411	0.424	0.681	0.202	0.205	0.868	0.926	0.689	0.289	0.381	0.281	0.914	0.205
3	0.747646	0.637161	0.923065	1.187	0.564	0.162	2.028	0.683	0.968	0.619	0.436	0.346	0.939	0.249	0.164	0.935	0.976	0.563	0.283	0.518	0.229	0.835	0.17
Average	0.766825	0.636366	0.882172	1.08133	0.513333	0.318667	2.19033	0.653	0.878667	0.523667	0.423333	0.389	0.818	0.219333	0.175333	0.95	0.966333	0.661667	0.29	0.469333	0.253	0.885667	0.184
Normalized	1	0.829871	1.15042	1	0.474723	0.294698	1	0.298128	0.401157	1	0.808402	0.742839	1	0.268134	0.214344	1	1.01719	1	0.438287	1	0.539062	1	0.207753
SD	0.0299288	0.0301247	0.0965583	0.153697	0.0744998	0.123915	0.248186	0.0382623	0.0632157	0.110996	0.0102089	0.0323419	0.105934	0.0210766	0.0211713	0.0738422	0.0297807	0.0720432	0.00616441	0.0625691	0.0214165	0.0359104	0.0151217
Variance	0.0013436	0.00136125	0.0139852	0.0354343	0.00832533	0.0230323	0.0923943	0.002196	0.00599433	0.0184803	0.000156333	0.001569	0.016833	0.000666333	0.000672333	0.008179	0.00133033	0.00778533	5.7e-05	0.00587233	0.000688	0.00193433	0.000343
p value (One way ANOVA)		0.1312			<0.0001	<0.0001		<0.0001	<0.0001		0.2433	0.1195		<0.0001	<0.0001				< 0.0001		0.0142		<0.0001
p Value (paired T TEST)		0.0122074			0.00958183	0.0331869		0.011215	0.0222017		0.325812	0.265952		0.0107363	0.0182401				0.00362368		0.0665136		0.000763733
	Control1				NTN1					DCC
	Normalize	SD	N		Normalize	SD	N	P value (One way ANOVA)		Normalize	SD	N	P value (One way ANOVA)
	1	0.0299288	3		0.829871	0.0301247	3	0.1312		1.15042	0.0965583	3
	Control2				Unc5A					UNC5B
	Normalize	SD	N		Normalize	SD	N	P value (One way ANOVA)		Normalize	SD	N	P value (One way ANOVA)
	1	0.153697	3		0.474723	0.0744998	3	<0.0001		0.294698	0.123915	3	<0.0001
	Control3				UNC5C					UNC5D
	Normalize	SD	N		Normalize	SD	N	P value (One way ANOVA)		Normalize	SD	N	P value (One way ANOVA)
	1	0.248186	3		0.298128	0.0382623	3	<0.0001		0.401157	0.0632157	3	<0.0001
	Control4				NTN3					NTN5
	Normalize	SD	N		Normalize	SD	N	P value (One way ANOVA)		Normalize	SD	N	P value (One way ANOVA)
	1	0.110996	3		0.808402	0.0102089	3	0.2433		0.742839	0.0323419	3	0.1195
	Control5				NTN4					NTNG1
	Normalize	SD	N		Normalize	SD	N	P value (One way ANOVA)		Normalize	SD	N	P value (One way ANOVA)
	1	0.105934	3		0.268134	0.0210766	3	<0.0001		0.214344	0.0211713	3	<0.0001
	Control6				NTNG2
	Normalize	SD	N		Normalize	SD	N	P value (One way ANOVA)
	1	0.0738422	3		1.01719	0.0297807	3
	Control7				FAK
	Normalize	SD	N		Normalize	SD	N	P value (One way ANOVA)
	1	0.0720432	3		0.438287	0.00616441	3	< 0.0001
	Control8				DSCAM
	Normalize	SD	N		Normalize	SD	N	P value (One way ANOVA)
	1	0.0625691	3		0.539062	0.0214165	3	0.0142
	Control9				NTNG1:G2
	Normalize	SD	N		Normalize	SD	N	P value (One way ANOVA)
	1	0.0359104	3		0.207753	0.0151217	3	<0.0001

## Sheet: OVCAR4
	Control1	NTN1	DCC	UNC5A	UNC5B	UNC5C	Control2	UNC5D	Control3	NTN3	NTN4	NTN5	NTNG1	Control4	NTNG2	NTNG1:G2	Control5	FAK	DSCAM
1	1.46118	0.667547	0.465032	0.629487	0.930155	0.971901	1.211	0.284	0.511	0.188	0.212	0.499	2.6715	0.156	0.154	1.32	0.688	0.537	0.541
2	1.52096	0.904648	0.689646	0.576924	0.767946	0.737755	0.924	0.312	0.433	0.1823	0.2062	0.499	2.854	0.151	0.181	1.065	0.709	0.571	0.516
3	1.4722	0.796483	0.519992	0.611143	0.829988	0.809979	1.233	0.271	0.433	0.1823	0.2062	0.558	2.7492	0.133	0.214	1.126	0.702	0.495	0.571
Average	1.48478	0.789559	0.558224	0.605851	0.842696	0.839879	1.12267	0.289	0.459	0.1842	0.208133	0.518667	2.75823	0.146667	0.183	1.17033	0.699667	0.534333	0.542667
Normalized	1	0.531769	0.375964	0.408041	0.567556	0.565659	1	0.257423	1	0.401307	0.45345	1.12999	6.00922	1	1.24773	7.97955	1	0.763697	0.775607
SD	0.0259732	0.0969197	0.0956002	0.0217824	0.0668286	0.0978998	0.140765	0.0171075	0.0367696	0.00268701	0.00273415	0.0278129	0.0747786	0.00987702	0.0245357	0.108721	0.00873053	0.0310841	0.0224846
Variance	0.00101191	0.0140901	0.0137091	0.000711706	0.00669909	0.0143766	0.0297223	0.000439	0.002028	1.083e-05	1.12133e-05	0.00116033	0.00838776	0.000146333	0.000903	0.0177303	0.000114333	0.00144933	0.000758333
P value (One way ANOVA)		<0.0001	<0.0001	<0.0001	<0.0001	<0.0001		< 0.0001		< 0.0001	0.0003							0.0126	0.0173
P value (Paired T-TEST0		0.00557136	0.00281722	0.00146144	0.00981401	0.0170442		0.017359		0.0076037	0.00907822							0.0160008	0.0137223
	Control1				NTN1					DCC					UNC5A					UNC5B					UNC5C
	Normalize	SD	N		Normalize	SD	N	P value (One way ANOVA)		Normalize	SD	N	P value (One way ANOVA)		Normalize	SD	N	P value (One way ANOVA)		Normalize	SD	N	P value (One way ANOVA)		Normalize	SD	N	P value (One way ANOVA)
	1	0.0259732	3		0.531769	0.0969197	3	<0.0001		0.375964	0.0956002	3	<0.0001		0.408041	0.0217824	3	<0.0001		0.567556	0.0668286	3	<0.0001		0.565659	0.0978998	3	<0.0001
	Control2				UNC5D
	Normalize	SD	N		Normalize	SD	N	P value (One way ANOVA)
	1	0.140765	3		0.257423	0.0171075	3	< 0.0001
	Control3				NTN3					NTN4					NTN5					NTNG1
	Normalize	SD	N		Normalize	SD	N	P value (One way ANOVA)		Normalize	SD	N	P value (One way ANOVA)		Normalize	SD	N	P value (One way ANOVA)		Normalize	SD	N	P value (One way ANOVA)
	1	0.0367696	3		0.401307	0.00268701	3	< 0.0001		0.45345	0.00273415	3	0.0003		1.12999	0.0278129	3			6.00922	0.0747786	3
	Control4				NTNG2					NTNG1:G2
	Normalize	SD	N		Normalize	SD	N	P value (One way ANOVA)		Normalize	SD	N	P value (One way ANOVA)
	1	0.00987702	3		1.24773	0.0245357	3			7.97955	0.108721	3
	Control5				FAK					DSCAM
	Normalize	SD	N		Normalize	SD	N	P value (One way ANOVA)		Normalize	SD	N	P value (One way ANOVA)
	1	0.00873053	3		0.763697	0.0310841	3	0.0126		0.775607	0.0224846	3	0.0173

## Sheet: COV318
	Control1	NTN1	DCC	UNC5C	Control2	UNC5A	FAK	DSCAM	Control3	UNC5B	UNC5D	Control4	NTN3	NTN4	NTN5	NTNG1	NTNG2	NTNG1:G2
1	0.324398	0.232456	0.414648	0.269969	0.517	0.741	0.381	0.752	0.151	0.188	0.57	0.129	0.299	0.407	0.323	0.203	0.391	0.207
2	0.365157	0.270428	0.561272	0.302985	0.569	0.916	0.442	0.822	0.152	0.189	1.088	0.118	0.281	0.349	0.327	0.186	0.354	0.234
3	0.344437	0.29544	0.501738	0.308146	0.525	1.023	0.44	0.862	0.14	0.144	0.925	0.131	0.306	0.402	0.31	0.184	0.363	0.208
Average	0.344664	0.266108	0.492553	0.2937	0.537	0.893333	0.421	0.812	0.147667	0.173667	0.861	0.126	0.295333	0.386	0.32	0.191	0.369333	0.216333
Normalized	1	0.77208	1.42908	0.852135	1	1.66356	0.783985	1.5121	1	1.17607	5.8307	1	2.34392	3.06349	2.53968	1.51587	2.93122	1.71693
SD	0.0166405	0.0258937	0.0602105	0.0169121	0.0228619	0.116236	0.0282961	0.0454606	0.0054365	0.0209815	0.216261	0.00571548	0.0105304	0.0262425	0.00725718	0.00852447	0.0157551	0.0124989
Variance	0.000415359	0.00100573	0.00543795	0.000429026	0.000784	0.0202663	0.001201	0.0031	4.43333e-05	0.000660333	0.070153	4.9e-05	0.000166333	0.001033	7.9e-05	0.000109	0.000372333	0.000234333
P value (One way ANOVA)		0.217		0.4203			0.0717
P value (Paired T-Test)		0.0337156		0.0219054			0.0107433
	Control1				NTN1					DCC					UNC5C
	Normalize	SD	N		Normalize	SD	N	P value (One way ANOVA)		Normalize	SD	N	P value (One way ANOVA)		Normalize	SD	N	P value (One way ANOVA)
	1	0.0166405	3		0.77208	0.0258937	3	0.217		1.42908	0.0602105	3			0.852135	0.0169121	3	0.4203
	Control2				UNC5A					FAK					DSCAM
	Normalize	SD	N		Normalize	SD	N	P value (One way ANOVA)		Normalize	SD	N	P value (One way ANOVA)		Normalize	SD	N	P value (One way ANOVA)
	1	0.0228619	3		1.66356	0.116236	3			0.783985	0.0282961	3	0.0717		1.5121	0.0454606	3
	Control3				UNC5B					UNC5D
	Normalize	SD	N		Normalize	SD	N	P value (One way ANOVA)		Normalize	SD	N	P value (One way ANOVA)
	1	0.0054365	3		1.17607	0.0209815	3			5.8307	0.216261	3
	Control4				NTN3					NTN4					NTN5					NTNG1					NTNG2					NTNG1:G2
	Normalize	SD	N		Normalize	SD	N	P value (One way ANOVA)		Normalize	SD	N	P value (One way ANOVA)		Normalize	SD	N	P value (One way ANOVA)		Normalize	SD	N	P value (One way ANOVA)		Normalize	SD	N	P value (One way ANOVA)		Normalize	SD	N	P value (One way ANOVA)
	1	0.00571548	3		2.34392	0.0105304	3			3.06349	0.0262425	3			2.53968	0.00725718	3			1.51587	0.00852447	3			2.93122	0.0157551	3			1.71693	0.0124989	3

## Sheet: iOvCa147
Experiment number	Control1	NTN1	DCC	UNC5A	UNC5B	UNC5C	UNC5D	Control2	NTN3	NTN4	NTN5	NTNG1	NTNG2	Control3	NTNG1:G2	Control4	Unc5 KO	DDN	Control5	Unc5 KO	DDN
1	1.24061	0.76121	1.1359	0.939986	0.7703	0.760883	1.10019	0.786	0.321	0.853	1.059	0.738	0.398	0.799	0.67	1.01653	0.37883	0.454341	0.519683	0.21367	0.240596
2	1.23048	0.738103	1.23091	0.89559	0.7837	0.76499	1.10959	0.802	0.28	0.798	1.053	0.855	0.313	0.834	0.743	1.23173	0.391121	0.435466	0.638741	0.213899	0.22989
3	1.24041	0.769	1.0107	0.980483	0.79129	0.779453	1.05572	0.551	0.344	0.773	2.2	0.665	0.39	0.569	0.757	1.54933	0.383214	0.402323	0.789237	0.210069	0.216134
Average	1.23717	0.756104	1.12584	0.938687	0.781764	0.768442	1.0885	0.713	0.315	0.808	1.43733	0.752667	0.367	0.734	0.723333	1.26586	0.384388	0.43071	0.64922	0.212546	0.228873
Normalized	1	0.611157	0.910011	0.758737	0.631897	0.621129	0.879831	1	0.441795	1.13324	2.0159	1.05563	0.514727	1	0.985468	1	0.303657	0.34025	1	0.327387	0.352536
SD	0.00472909	0.0131204	0.0901797	0.0346697	0.00867796	0.00796463	0.0234952	0.114737	0.0264701	0.0334166	0.539292	0.0782574	0.0383232	0.117544	0.038143	0.218851	0.00508571	0.0215009	0.110294	0.00175382	0.0100125
Variance	3.35465e-05	0.000258217	0.0121986	0.00180298	0.00011296	9.5153e-05	0.000828037	0.019747	0.001051	0.001675	0.436254	0.00918633	0.002203	0.020725	0.00218233	0.0718435	3.87967e-05	0.000693431	0.0182472	4.61383e-06	0.000150377
P Value (One way ANOVA)		0.0012	0.424	0.0362	0.002	0.0015	0.2872		0.0061				0.0161		0.9998		< 0.0001	< 0.0001		0.0029	0.004
	Control1				NTN1					DCC				UNC5A					UNC5B					UNC5C					UNC5D
	Normalize	SD	N		Normalize	SD	N	P value (One way ANOVA)		Normalize	N	P value (One way ANOVA)		Normalize	SD	N	P value (One way ANOVA)		Normalize	SD	N	P value (One way ANOVA)		Normalize	SD	N	P value (One way ANOVA)		Normalize	SD	N	P value (One way ANOVA)
	1	0.00472909	3		0.611157	0.0131204	3	0.0012		0.910011	3	0.424		0.758737	0.0346697	3	0.0362		0.631897	0.00867796	3	0.002		0.621129	0.00796463	3	0.0015		0.879831	0.0234952	3	0.2872
	Control2				NTN3				NTN4					NTN5					NTNG1					NTNG2
	Normalize	SD	N		Normalize	SD	N	P value (One way ANOVA)	Normalize	SD	N	P value (One way ANOVA)		Normalize	SD	N	P value (One way ANOVA)		Normalize	SD	N	P value (One way ANOVA)		Normalize	SD	N	P value (One way ANOVA)
	1	0.114737	3		0.441795	0.0264701	3	0.0061	1.13324	0.0334166	3			2.0159	0.539292	3			1.05563	0.0782574	3			0.514727	0.0383232	3	0.0161
	Control 3				NTNG1:G2
	Normalize	SD	N		Normalize	SD	N	P value (One way ANOVA)
	1	0.117544	3		0.985468	0.038143	3	0.9998
	Control4				Unc5KO					DDN
	Normalize	SD	N		Normalize	SD	N	P value (One way ANOVA)		Normalize	SD	N	P value (One way ANOVA)
	1	0.218851	3		0.303657	0.00508571	3	< 0.0001		0.34025	0.0215009	3	< 0.0001
	Control5				Unc5 KO					DDN
	Normalize	SD	N		Normalize	SD	N	P value (One way ANOVA)		Normalize	SD	N	P value (One way ANOVA)
	1	0.110294	3		0.327387	0.00175382	3	0.0029		0.352536	0.0100125	3	0.004

## Sheet: TOV1946
	Control1	DCC	UNC5A	UNC5B	Control2	NTN3	NTN4	NTN5	NTNG1	NTNG2	Control3	UNC5 KO	DDN	Control4	NTNG1:G2	Control5	NTN1	DCC	FAK	DSCAM	Control6	UNC5D	Control7	UNC5C
1	1.643	1.51656	0.842816	1.86084	0.224	0.38	0.19	0.122	0.195	0.14	0.868	0.338	0.322	0.258	0.123	0.125	0.309	0.265	0.175	0.543	0.596	0.706	0.51	1.498
2	1.71274	1.38096	0.717489	1.69949	0.258	0.44	0.234	0.117	0.177	0.141	0.954	0.283	0.275	0.471	0.12	0.114	0.316	0.247	0.171	0.483	0.714	0.929	0.676	1.795
3	1.65071	1.19609	0.782167	1.62476	0.224	0.485	0.209	0.12	0.212	0.132	1.248	0.234	0.31	0.643	0.118	0.137	0.302	0.283	0.194	0.288	0.584	0.782	0.479	1.437
Average	1.66882	1.36454	0.780824	1.72836	0.235333	0.435	0.211	0.119667	0.194667	0.137667	1.02333	0.285	0.302333	0.457333	0.120333	0.125333	0.309	0.265	0.18	0.438	0.631333	0.805667	0.555	1.57667
Normalized	1	0.817668	0.46789	1.03568	1	1.84844	0.896601	0.508499	0.827195	0.584986	1	0.278502	0.29544	1	0.26312	1	2.46543	2.11436	1.43617	3.49468	1	1.27614	1	2.84084
SD	0.0312194	1.36454	0.0511731	0.0985152	0.0160278	0.0430116	0.0180185	0.0020548	0.0142906	0.00402768	0.162697	0.0424814	0.0199388	0.157472	0.0020548	0.00939267	0.00571548	0.0146969	0.0100333	0.108858	0.0586591	0.0925647	0.0864908	0.156381
Variance	0.00146198	0.025877	0.00392803	0.0145579	0.000385333	0.002775	0.000487	6.33333e-06	0.000306333	2.43333e-05	0.0397053	0.002707	0.000596333	0.0371963	6.33333e-06	0.000132333	4.9e-05	0.000324	0.000151	0.017775	0.00516133	0.0128523	0.011221	0.0366823
P value (One way ANOVA)		0.0003	< 0.0001				0.754	0.1406	0.6007	0.2119		< 0.0001	< 0.0001		< 0.0001
	Control1				DCC					Unc5A					Unc5B
	Normalize	SD	N		Normalize	SD	N	P value (One way ANOVA)		Normalize	SD	N	P value (One way ANOVA)		Normalize	SD	N	P value (One way ANOVA)
	1	0.0312194	3		0.817668	1.36454	3	0.0003		0.46789	0.0511731	3	< 0.0001		1.03568	0.0985152	3
	Control2				NTN3					NTN4					NTN5					NTNG1					NTNG2
	Mean	SD	N		Normalize	SD	N	P value (One way ANOVA)		Normalize	SD	N	P value (One way ANOVA)		Normalize	SD	N	P value (One way ANOVA)		Normalize	SD	N	P value (One way ANOVA)		Normalize	SD	N	P value (One way ANOVA)
	1	0.0160278	3		1.84844	0.0430116	3			0.896601	0.0180185	3	0.754		0.508499	0.0020548	3	0.1406		0.827195	0.0142906	3	0.6007		0.584986	0.00402768	3	0.2119
	Control3				Unc5 KO					DDN
	Normalize	SD	N		Normalize	SD	N	P value (One way ANOVA)		Normalize	SD	N	P value (One way ANOVA)
	1	0.162697	3		0.278502	0.0424814	3	< 0.0001		0.29544	0.0199388	3	< 0.0001
	Control4				NTNG1:G2
	Normalize	SD	N		Normalize	SD	N	P value (One way ANOVA)
	1	0.157472	3		0.26312	0.0020548	3	< 0.0001
	Control5				NTN1	SD	N			DCC					FAK					DSCAM
	Normalize	SD	N		Normalize			P value (One way ANOVA)		Normalize	SD	N	P value (One way ANOVA)		Normalize	SD	N	P value (One way ANOVA)		Normalize	SD	N	P value (One way ANOVA)
	1	0.00939267	3		2.46543	0.00571548	3			2.11436	0.0146969	3			1.43617	0.0100333	3			3.49468	0.108858	3
	Control 6				Unc5D
	Normalize	SD	N		Normalize	SD	N	P value (One way ANOVA)
	1	0.0586591	3		1.27614	0.0925647	3
	Control7				Unc5C
	Normalize	SD	N		Normalize	SD	N	P value (One way ANOVA)
	1	0.0864908	3		2.84084	0.156381	3
