# Supplementary material for: Netrin signaling mediates survival of dormant epithelial ovarian cancer cells
Source: eLife. 2024 Jul 18;12:RP91766. doi: 10.7554/eLife.91766 (PMC11257678; doi:10.7554/eLife.91766)
Supplement: Figure 5—source data 10. [file elife-91766-fig5-data10.xlsx]

## Sheet: Tram crystal violet
trametineb concentration (nM)	% viability triplicate
0.01	99.2158	102.504	98.2798
0.1	89.3082	85.9662	86.9841
0.5	73.0916	74.8881	76.2806
1	70.4026	73.8307	67.3802
10	50.2379	54.7999	52.4369
40	38.2753	41.4648	46.6067
100	30.5067	29.6846	35.8225
1000	17.0344	19.2046	18.9054

## Sheet: Tram trypan blue
average of two sides
treatment	Total cells	live cell (%)	dead cell (%)	live cells	dead cells
DMSO1	15350000	70.5	29.5	10820000	4540000
DMSO2	17350000	58.5	41.5	10255000	7095000
DMSO3	13800000	71.5	28.5	9850000	3935000
0.1nM 1	12300000	73	27	8985000	3335000	Vehicle	70.5	58.5	71.5	0.705	0.585	0.715
0.1nM 2	16200000	66.5	33.5	10750000	5420000	100nM	23	23	12	0.23	0.23	0.12
0.1nM 3	4.69503e+06	68.5	31.5	6745000	3035000
0.6nM 1	5810000	67.5	32.5	3910000	1895000					values normalized to control
0.6nM 2	16500000	77	23	12850000	3690000					0.668333
0.6nM 3	11950000	72	28	8585000	3350000				Vehicle	1.05486	0.875312	1.06983
10nM 1	6140000	58	42	3575000	2565000				100nM	0.34414	0.34414	0.179551
10nM 2	15450000	61.5	38.5	9415000	5895000
10nM 3	11585000	75.5	24.5	8760000	2805000
100nM 1	4970000	23	77	1138500	3830000
100nM 2	9385000	23	77	2175000	7210000
100nM 3	12750000	12	88	1580000	11150000
1uM 1	8235000	15	85	1218000	7025000
1uM 2	12000000	11.5	88.5	1365000	10650000
1uM 3	12750000	11.5	88.5	1510000	11250000

## Sheet: PD treatment
	DMSO	DMSO	DMSO	PD	PD	PD	mean DMSO	SD DMSO	mean PD	SD PD
Day 3	90.3898	107.571	102.039	14.1813	13.0552	15.6234	100	8.7702	14.2866	1.28735
Day 5	19.2967	26.0137	15.3532	11.0806	11.1531	11.9078	20.2212	5.39006	11.3805	0.458088
Day 7	21.2664	21.4144	17.2999	10.1066	10.1183	10.6297	19.9936	2.33395	10.2849	0.298697
			20.2212
			0.95428	1.28646	0.759263
			0.547971	0.551554	0.588878
