# Supplementary material for: Netrin signaling mediates survival of dormant epithelial ovarian cancer cells
Source: eLife. 2024 Jul 18;12:RP91766. doi: 10.7554/eLife.91766 (PMC11257678; doi:10.7554/eLife.91766)
Supplement: Figure 6—figure supplement 1—source data 1. [file elife-91766-fig6-figsupp1-data1.xlsx]

## Sheet: iOvCa147
iOvCa147	Ad	Ad	Ad	Sph	Sph	Sph
GAPDH	16.1664	16.0113	15.444	16.431	16.4588	16.6625
Ki67	18.9219	18.7147	18.3377	23.0974	23.0878	23.1531
Cyclin D	20.6998	20.8589	20.5498	25.8551	25.7835	25.8743
PCNA	17.9393	17.5823	17.5957	21.6803	21.5463	21.352
Average	Ad	Sph	Normalize	Ad	Sph	Relative Expression Sph/Ad		log2 FC
GAPDH	15.8739	16.5174
Ki67	18.6581	23.1128		2.78418	6.59531		0.0712419	-3.81113
Cyclin D	20.7028	25.8376		4.8289	9.32018		0.0444622	-4.49128
PCNA	17.7058	21.5262		1.83187	5.00874		0.110578	-3.17687
	Ad	Ad	Ad	Sph	Sph	Sph
GAPDH	15.4839	15.3694	15.5225	16.458	16.3684	18.3285
Ki67	18.1635	18.4479	18.5423	23.0221	23.1175	23.4553
Cyclin D	20.5188	20.3078	20.6562	25.8577	25.9014	25.8035
PCNA	17.3314	17.5118	17.5009	21.4562	21.3816	21.648
Average	Ad	Sph	Normalize	Ad	Sph	Relative Expression Sph/Ad		Log2FC
GAPDH	15.4586	17.0516
Ki67	18.3845	23.1983		2.92592	6.14666		0.107265	-3.22074
Cyclin D	20.4943	25.8542		5.03566	8.80258		0.0734587	-3.76692
PCNA	17.448	21.4953		1.9894	4.44365		0.182473	-2.45425
	Ad	Sph	Normalize			Relative Expression Sph/Ad		Log2FC
GAPDH	15.5365	16.5817
Ki67	18.4687	23.0517		2.93217	6.46998		0.0861021	-3.53781
Cyclin D	21.0948	25.6872		5.55831	9.1055		0.085544	-3.54719
PCNA	18.0298	21.5048		2.49323	4.92311		0.185581	-2.42988
	Ad		Normalize	Ad	Sph-1	Sph-2	Sph-3	Relative Expression Sph/Ad	Sph-1	Sph-2	Sph-3	Log2FC	Sph-1	Sph-2	Sph-3
GAPDH	15.4586
Ki67	18.3845			2.92592	6.56409	6.74909	5.12681		0.0803159	0.0706497	0.217504		-3.63817	-3.82317	-2.20089
Cyclin D	20.4943			5.03566	9.39975	9.53296	7.47504		0.0485599	0.044277	0.184363		-4.36409	-4.4973	-2.43938
PCNA	17.448			1.9894	4.99823	5.01316	3.31955		0.124238	0.122958	0.397726		-3.00883	-3.02376	-1.33015
147	Ad	Ad	Ad	Sph	Sph	Sph
GAPDH	16.1664	16.0113	15.444	16.431	16.4588	16.6625
Ki67	18.9219	18.7147	18.3377	23.0974	23.0878	23.1531
Cyclin D	20.6998	20.8589	20.5498	25.8551	25.7835	25.8743
PCNA	17.9393	17.5823	17.5957	21.6803	21.5463	21.352
			Normalize	Ad	Sph-1	Sph-2	Sph-3	Relative Expression Sph/Ad	Sph-1	Sph-2	Sph-3	Log2FC	Sph-1	Sph-2	Sph-3
GAPDH	15.8739
Ki67	18.6581			2.78418	6.66641	6.62894	6.49058		0.067816	0.0696005	0.0766059		-3.88223	-3.84476	-3.7064
Cyclin D	20.7028			4.8289	9.42407	9.32463	9.21183		0.041373	0.0443251	0.0479299		-4.59517	-4.49573	-4.38293
PCNA	17.7058			1.83187	5.24931	5.08744	4.68946		0.0935942	0.104707	0.137968		-3.41744	-3.25557	-2.85759

## Sheet: TOV1946
TOV	Ad	Ad	Ad	Sph	Sph	Sph
GAPDH	15.5723	15.2086	14.8788	15.3596	15.1869	15.4412
Ki67	20.0225	19.9263	19.7735	20.8624	21.0213	20.8409
Ki67	19.9008	20.0467	19.4933	20.4013	20.3015	20.5337
Cyclin D	22.3565	22.055	21.9739	22.4424	22.3842	22.3773
Cyclin D	22.2797	22.4686	22.1135	22.4305	22.6004	22.6694
PCNA	18.8871	19.0068	18.6332	19.8484	19.649	19.7278
PCNA	18.9942	19.0062	18.5872	19.965	20.0066	19.54
Average	Ad	Sph	Normalize	Ad	Sph	Relative Expression Sph/Ad		Log2FC
GAPDH	15.2199	15.3292
Ki67	19.9074	20.9082		4.68749	5.57899		0.539052	-0.891504
Ki67	19.8136	20.4122		4.59365	5.08294		0.712378	-0.489285
Cyclin D	22.1284	22.4013		6.90852	7.07207		0.892825	-0.163551
Cyclin D	22.2873	22.5667		7.06733	7.23752		0.888724	-0.170192
PCNA	18.8424	19.7417		3.62246	4.41252		0.578318	-0.790064
PCNA	18.8625	19.8372		3.64259	4.50797		0.5489	-0.865384
	Ad		Normalize	Ad	Sph-1	Sph-2	Sph-3	Relative Expression	Sph-1	Sph-2	Sph-3	Log2FC	Sph-1	Sph-2	Sph-3
GAPDH	15.2199
Ki67	19.9074			4.68749	5.50285	5.83437	5.39975		0.568265	0.4516	0.610361		-0.815364	-1.14688	-0.712265
Ki67	19.8136			4.59365	5.04168	5.11462	5.0925		0.733045	0.696901	0.707669		-0.448027	-0.520975	-0.498853
Cyclin D	22.1284			6.90852	7.08281	7.19728	6.93612		0.886203	0.818604	0.981052		-0.17429	-0.288763	-0.0275988
Cyclin D	22.2873			7.06733	7.07087	7.41349	7.22821		0.997548	0.786675	0.894483		-0.00354147	-0.346161	-0.160874
PCNA	18.8424			3.62246	4.48883	4.46213	4.2866		0.548523	0.558772	0.631062		-0.866377	-0.839669	-0.664147
PCNA	18.8625			3.64259	4.60543	4.81966	4.09883		0.513045	0.442249	0.728883		-0.962842	-1.17707	-0.45624

## Sheet: OVCAR8
OV8	Ad	Ad	Ad	Sph	Sph	Sph
GAPDH	16.8332	16.5747	16.5185	15.7686	15.6862	15.8102
Ki67	20.5942	20.6346	20.6939	20.9606	21.0734	21.4062
Ki67	20.4902	20.4881	20.6197	21.1041	20.9945	21.2081
Cyclin D	21.0716	21.275	21.1134	23.4328	23.3939	23.4736
Cyclin D	21.3067	21.4264	21.4674	23.5092	23.2792	23.4828
PCNA	17.5408	17.5981	17.5593	18.192	18.6896	18.558
PCNA	17.619	18.0288	17.8128	18.4364	18.4733	18.9449
Average	Ad	Sph	Normalize	Ad	Sph	Relative Expression Sph/Ad		Log2FC
GAPDH	16.6421	15.755
Ki67	20.6409	21.1467		3.9988	5.39172		0.380794	-1.39292
Ki67	20.5327	21.1022		3.89055	5.34723		0.36433	-1.45668
Cyclin D	21.1533	23.4334		4.5112	7.67847		0.111316	-3.16726
Cyclin D	21.4002	23.4237		4.75807	7.66874		0.132985	-2.91067
PCNA	17.566	18.4799		0.923917	2.72489		0.28698	-1.80098
PCNA	17.8202	18.6182		1.17806	2.86322		0.310968	-1.68516
	Ad			Ad	Sph-1	Sph-2	Sph-3	Relative Expression Sph/Ad	Sph-1	Sph-2	Sph-3	Log2FC	Sph-1	Sph-2	Sph-3
GAPDH	16.6421
Ki67	20.6409			3.9988	5.19201	5.3872	5.59596		0.437331	0.381989	0.330529		-1.1932	-1.3884	-1.59715
Ki67	20.5327			3.89055	5.33552	5.30829	5.39787		0.367299	0.374297	0.351762		-1.44497	-1.41774	-1.50733
Cyclin D	21.1533			4.5112	7.66422	7.70776	7.66343		0.112421	0.109079	0.112483		-3.15301	-3.19656	-3.15223
Cyclin D	21.4002			4.75807	7.74063	7.59302	7.67257		0.126521	0.140151	0.132632		-2.98256	-2.83494	-2.9145
PCNA	17.566			0.923917	2.42346	3.00344	2.74777		0.353665	0.236593	0.282465		-1.49955	-2.07952	-1.82386
PCNA	17.8202			1.17806	2.66783	2.7871	3.13473		0.356069	0.327815	0.257622		-1.48977	-1.60904	-1.95667
