# Supplementary material for: Netrin signaling mediates survival of dormant epithelial ovarian cancer cells
Source: eLife. 2024 Jul 18;12:RP91766. doi: 10.7554/eLife.91766 (PMC11257678; doi:10.7554/eLife.91766)
Supplement: Figure 6—source data 1. [file elife-91766-fig6-data1.xlsx]

## Sheet: Sheet1
2LN
GAPDH	15.112	15.2865	14.4967	15.7238	16.0001	15.95
GAPDH	14.8883	14.9012	14.686	15.5291	15.2679	15.2451
GAPDH	14.7099	14.7866	14.4975	15.5228	15.3658	15.2312
Ki67	20.1721	19.6499	19.9305	21.3371	21.1949	21.07
CyclinD1	20.7746	20.4574	20.3781	22.9761	22.6588	22.7183
GAPDH	14.9651	15.8913
GAPDH	14.8252	15.3474
GAPDH	14.6647	15.3732
Ki67	19.9175	21.2007
CyclinD1	20.5367	22.7844
				Normalize	Ad	Sph		Relative Expression Sph/Ad		log2FC
GAPDH	14.8183	15.5373
Ki67	19.9175	21.2007			5.09921	5.66337			0.676346	-0.564166
CyclinD1	20.5367	22.7844			5.71838	7.24712			0.346579	-1.52875
2LN
GAPDH	15.0933	14.9052	14.347	15.3454	15.3711	16.0791
GAPDH	14.1612	14.464	14.5015	15.422	15.5682	15.3434
GAPDH	14.6136	14.256	14.3043	15.4276	15.4628	15.4377
Ki67	19.6871	20.0219	19.4374	21.0575	21.2123	21.7235
PCNA	17.5609	17.604	17.3616	18.561	18.7119	18.7049
CyclinD1	20.2473	20.1899	20.0049	22.7028	22.7688	23.0029
	Ad	Sph
GAPDH	14.7818	15.5986
GAPDH	14.3756	15.4445
GAPDH	14.3913	15.4427
				Normalize	Ad	Sph		Relative Expression Sph/Ad		Log2FC
GAPDH	14.5162	15.4953
Ki67	19.7155	21.3311			5.19925	5.83585			0.643229	-0.636597
PCNA	17.5089	18.6593			2.99262	3.164			0.887994	-0.171378
CyclinD1	20.1474	22.8248			5.63116	7.32954			0.308132	-1.69838
2LN	Ad	Ad	Ad	Sph	Sph	Sph
GAPDH	16.1675	15.7109	15.4213	16.2318	16.2073	16.1044
Ki67	21.1949	20.7758	20.8514	22.0471	22.0243	21.9025
PCNA	18.4362	18.1396	18.1293	18.8345	18.5766	18.6757
CyclinD1	21.6801	21.4964	21.1786	23.17	22.9309	22.9998
				Normalize	Ad	Sph		Relative Expression Sph/Ad		Log2FC
GAPDH	15.7665	16.1811
Ki67	20.9407	21.9913			5.17414	5.81013			0.643497	-0.635994
PCNA	18.235	18.6956			2.46849	2.51443			0.96866	-0.0459372
CyclinD1	21.4517	23.0336			5.68514	6.85244			0.445256	-1.16729
2LN	Ad	Ad	Ad	Sph	Sph	Sph
GAPDH	15.8164	15.473	15.4323	15.7844	15.6277	15.6376
Ki67	21.3805	20.7868	20.5801	21.7696	21.5582	21.3304
CyclinD1	21.4859	21.5177	21.3507	23.0526	23.2336	23.3935
PCNA	18.8905	18.5737	18.5979	19.3859	19.4805	19.0681
				Normalize	Ad	Sph		Relative Expression Sph/Ad		log2FC
GAPDH	15.5739	15.6832
Ki67	20.9158	21.5527			5.34191	5.86952			0.693704	-0.527609
CyclinD1	21.4514	23.2266			5.87754	7.54337			0.315162	-1.66583
PCNA	18.6874	19.3115			3.11351	3.62833			0.315162	-1.66583
1RN	Ad	Ad	Ad	Sph	Sph	Sph
GAPDH	17.3019	17.2364	17.5486	17.8153	17.6055	18.416
CyclinD1	23.027	23.0131	23.0516	25.8014	25.7182	26.1777
PCNA	18.0334	18.2834	18.1337	20.0215	20.0048	20.1774
				Normalize	Ad	Sph		Relative Expression Sph/Ad		Log2FC
GAPDH	17.3623	17.9456
CyclinD1	23.0306	25.8991			5.66824	7.95348			0.205152	-2.28524
PCNA	18.1502	20.0679			0.787849	2.12223			0.396561	-1.33439
1RN	Ad	Ad	Ad	Sph	Sph	Sph
GAPDH	17.1192	16.994	17.061	17.6278	17.6803	17.9895
CyclinD1	22.7762	23.2827	23.3511	25.9034	26.1575	26.4046
PCNA	18.7914	18.6532	18.5598	20.1317	19.9891	20.8463
				Normalize	Ad	Sph		Relative Expression Sph/Ad		Log2FC
GAPDH	17.0581	17.7659
CyclinD1	23.1366	26.1552			6.07859	8.38929			0.201562	-2.3107
PCNA	18.6681	20.3224			1.61009	2.55648			0.518932	-0.946384
1NN	Ad	Ad	Ad	Sph	Sph	Sph
GAPDH	16.4884	16.4139	16.3678	16.4275	16.0917	16.312
Ki67	21.5866	21.2522	21.0497	21.909	22.178	22.0457
Ki67	21.2957	21.1937	21.1999	22.1181	21.757	21.8661
PCNA	18.0488	18.1638	17.7483	19.2187	19.0034	19.3004
PCNA	18.0612	17.5594	17.4898	19.0694	19.1113	18.9906
CyclinD1	22.4373	22.1002	22.0301	24.0221	24.1091	23.968
CyclinD1	22.2481	22.1058	22.0477	24.3454	24.0712	23.8388
Avarage	Ad	Sph-1	Sph-2	Sph-3		Normalize	Ad	Sph-1	Sph-2	Sph-3
GAPDH	16.4234	16.4275	16.0917	16.312
Ki67	21.2962	21.909	22.178	22.0457			4.87279	5.48145	6.08638	5.73365
Ki67	21.2298	22.1181	21.757	21.8661			4.80639	5.69061	5.66531	5.55401
PCNA	17.987	19.2187	19.0034	19.3004			1.5636	2.79116	2.91178	2.98835
PCNA	17.7035	19.0694	19.1113	18.9906			1.28008	2.64186	3.01962	2.67851
CyclinD1	22.1892	24.0221	24.1091	23.968			5.76584	7.59462	8.01745	7.65591
CyclinD1	22.1338	24.3454	24.0712	23.8388			5.71047	7.9179	7.97954	7.52676
relative Expression Sph/Ad	Sph-1	Sph-2	Sph-3		Log2FC	Sph-1	Sph-2	Sph-3
GAPDH
Ki67	0.655807	0.431193	0.550626			-0.608657	-1.21359	-0.860855
Ki67	0.541781	0.551366	0.595585			-0.884218	-0.858918	-0.747622
PCNA	0.42704	0.39279	0.372485			-1.22756	-1.34817	-1.42475
PCNA	0.389102	0.299466	0.379342			-1.36178	-1.73954	-1.39843
CyclinD1	0.281502	0.209989	0.269794			-1.82878	-2.25161	-1.89007
CyclinD1	0.21652	0.207464	0.28395			-2.20743	-2.26907	-1.81629
	Ad	Sph	Normalize	Ad	Sph		Relative Expression Sph/Ad		Log2FC
GAPDH	16.4234	16.2771
Ki67	21.2962	22.0442		4.87279	5.76716			0.537982		-0.894369
Ki67	21.2298	21.9137		4.80639	5.63665			0.562431		-0.830253
PCNA	17.987	19.1742		1.5636	2.8971			0.396807		-1.33349
PCNA	17.7035	19.0571		1.28008	2.78			0.353574		-1.49992
CyclinD1	22.1892	24.0331		5.76584	7.756			0.251712		-1.99015
CyclinD1	22.1338	24.0851		5.71047	7.80806			0.233647		-2.0976
	Ad	Sph		Ad	Sph
GAPDH	16.4234	16.2771
Ki67	21.263	21.979		4.83959	5.7019		Ki67	0.550071		-0.862311
PCNA	17.8452	19.1156		1.42184	2.83855		PCNA	0.374567		-1.4167
CyclinD1	22.1615	24.0591		5.73815	7.78203		CyclinD1	0.242511		-2.04388
1RN/1NN	1RN Ad	1RN Ad	1RN Ad	1RN Sph	1RN Sph	1RN Sph	1NN Ad	1NN Ad	1NN Ad	1NN Sph	1NN Sph	1NN Sph
GAPDH	17.4398	17.0799	16.9724	17.5793	17.9364	18.092	15.7932	15.8885	15.8393	16.4722	16.348	16.4977
PCNA	18.0052	18.1298	17.8687	19.5107	19.3983	19.2278	17.8313	17.6522	17.5582	19.2905	19.2717	19.4188
CyclinD	22.9709	22.8199	23.0438	25.4028	25.6453	25.6779	21.181	21.5224	21.3427	24.2406	24.1239	24.2945
Ki67							21.0479	20.9604	21.1927	22.204	22.2037	22.4329
Ki67							20.7348	21.1025	20.7833	22.3	22.0595	22.5322
Average	1RN Ad	1RN Sph		1NN Ad	1NNSph		Normalize	1RN Ad	1RN Sph	1NN Ad	1NN Sph		Relative Expression Sph/Ad	1RN	1NN		Log2FC	1RN	1NN
GAPDH	17.164	17.8692		15.8404	16.4393								GAPDH
PCNA	18.0012	19.3789		17.6805	19.327			0.837194	1.50968	1.84019	2.88764		PCNA	0.627422	0.483825		PCNA	-0.672491	-1.04744
CyclinD	22.9449	25.5753		21.3487	24.2197			5.78081	7.70609	5.50834	7.78032		CyclinD	0.263291	0.207044		CyclinD	-1.92527	-2.27199
Ki67				21.067	22.2802					5.22667	5.84082		Ki67		0.653313		Ki67		-0.614154
Ki67				20.8735	22.2973					5.03318	5.85792		Ki67		0.564585		Ki67		-0.824738
Ki67				20.9703	22.2887					5.12992	5.84937				0.607331				-0.719446
	1RN Ad	1RN Ad	1RN Ad	1RN Sph	1RN Sph	1RN Sph	1NN Ad	1NN Ad	1NN Ad	1NN Sph	1NN Sph	1NN Sph
GAPDH	17.4045	17.2084	16.9775	17.357	17.5302	17.5629	15.8672	16.2991	15.7756	16.181	16.2284	16.3399
PCNA	18.1204	18.1982	17.9055	19.6851	19.4517	19.3062	17.3643	17.3951	17.4033	18.8754	19.1771	19.257
CyclinD	22.7667	22.868	22.6885	25.1851	25.3103	25.2884	21.1675	21.1725	21.3692	24.0255	23.7988	24.0461
	1RN Ad	1RN Sph		1NN Ad	1NN Sph		Normalize	1RN Ad	1RN Sph		1NN Ad	1NN Sph		Relative Expression Sph/Ad	1RN	1NN		log2FC	1RN	1NN
GAPDH	17.1968	17.4833		16.9867	16.2498
PCNA	18.0747	19.481		18.7074	19.1032			0.87793	1.99766		1.72064	2.85339			0.460179	0.456048		PCNA	-1.11973	-1.13274
CyclinD	22.7744	25.2613		23.9221	23.9568			5.5776	7.77791		6.93533	7.70702			0.21759	0.585731		CyclinD	-2.20031	-0.77169
1RN
GAPDH	16.3704	16.2147	16.079	17.4019	17.4721	18.0161
Ki67	20.8094	20.6398	20.5493	23.0358	23.0656	23.1435
				Normalize	Ad	Sph		Relative Expression Sph/Ad		Log2FC
GAPDH	16.2214	17.63
Ki67	20.6661	23.0816			4.44477	5.45157			0.497649	-1.0068
1RN
GAPDH	16.3005	16.0449	16.5877	17.7895	17.4759
Ki67	20.7557	20.4549	20.8378	23.2968	23.3301	23.5475
				Normalize	Ad	Sph		Relative Expression Sph/Ad
GAPDH	16.311	17.6327
Ki67	20.6828	23.3915			4.37178	5.75875			0.382367	-1.38697
1RN
GAPDH	16.3096	16.2609	16.3191	17.1576	17.1505	17.1313
Ki67	20.9977	20.9907	20.6938	23.1626	22.9266	23.162
				Normalize	Ad	Sph		Relative Expression Sph/Ad
GAPDH	16.2965	17.1465
Ki67	20.8941	23.0837			4.59753	5.93728			0.395089	-1.33975
1RN
GAPDH	16.2689	16.2216	16.2527	17.3173	17.5891	18.1328
Ki67	20.7991	20.718	20.574	23.1207	23.1091	23.458
				Normalize	Ad	Sph		Relative Expression Sph/Ad
GAPDH	16.2478	17.6798
Ki67	20.697	23.2293			4.44927	5.54951			0.466439	-1.10024
1NN	Ad	Ad	Ad	Sph	Sph	Sph
GAPDH	15.7576	15.8509	15.842	15.3277	15.1486	16.5175
Ki67	20.8957	20.6457	20.5809	21.5652	21.3057	21.5818
				Normalize	Ad	Sph	Relative Expression Sph/Ad		Log2FC
GAPDH	15.8168	15.6646
Ki67	20.7075	21.4842			4.89065	5.81961		0.525236	-0.928962
1NN
GAPDH	15.9168	15.7659	15.453	16.1622	15.2429	15.9287
Ki67	21.1339	20.8054	20.9057	21.7315	21.7595	21.5501
				Normalize	Ad	Sph	Relative Expression Sph/Ad		Log2FC
GAPDH	15.7119	15.778
Ki67	20.9483	21.6803			5.23643	5.9024		0.630266	-0.665968
1RN
GAPDH	15.0902	15.2332	15.417	16.4124	16.2686
Ki67	19.8672	20.0667	20.0192	22.2174	21.8892	22.4769
				Normalize	Ad	Sph	Relative Expression Sph/Ad		Log2FC
GAPDH	15.2468	16.3405
Ki67	19.9844	22.1945			4.73758	5.85399		0.46124	-1.11641
1RN
GAPDH	15.0812	15.1916	15.1785	16.2356	16.0131	15.9451
Ki67	19.7157	19.9477	20.0061	22.1522	22.1031	22.0494
				Noramalize	Ad	Sph	Relative Expression Sph/Ad		log2FC
GAPDH	15.1504	16.0646
Ki67	19.8899	22.1016			4.73942	6.03697		0.406818	-1.29754
