# Supplementary material for: Netrin signaling mediates survival of dormant epithelial ovarian cancer cells
Source: eLife. 2024 Jul 18;12:RP91766. doi: 10.7554/eLife.91766 (PMC11257678; doi:10.7554/eLife.91766)
Supplement: Figure 6—source data 2. [file elife-91766-fig6-data2.xlsx]

## Sheet: Sheet1
Blank 0.12
Lenti Control	0.268	0.358	0.635	0.334	0	0.694	Unc5KO	0.025	0.058	0	0.061	0.042	0.008
	0.273	0.355	0.632	0.335	0	0.694		0.026	0.055	0	0.059	0.038	0.015
	0.274	0.347	0.632	0.328	0	0.696		0.04	0.057	0	0.068	0.037	0.003
	0.271667	0.353333	0.633	0.332333		0.694667		0.0303333	0.0566667	0	0.0626667	0.039	0.00866667
Lenti Control Normalize							Unc5A Normalize
	0.768868	1	1.79151	0.940566	0	1.96604		0.0858491	0.160377	0	0.177358	0.110377	0.0245283
