# Supplementary material for: Netrin signaling mediates survival of dormant epithelial ovarian cancer cells
Source: eLife. 2024 Jul 18;12:RP91766. doi: 10.7554/eLife.91766 (PMC11257678; doi:10.7554/eLife.91766)
Supplement: Figure 6—source data 3. [file elife-91766-fig6-data3.xlsx]

## Sheet: Standard Curve
Amount Human DNA (ng/uL)	Log10 ng Human DNA	Mean Threshold Cycle (Cт)
100	2	9.34287
10	1	12.5227
1	0	16.2043
0.1	-1	19.1504
0.01	-2	21.3927
0.001	-3	23.1253
0.0001	-4	24.9718
1e-05	-5	27.0667
1e-06	-6	29.4387
1e-07	-7	31.2994
Mouse	-8	34.2997
NTC	-9	36.5816
*10-fold serial dilutions of Human gDNA in Mouse gDNA to make standards								y=⍺ + βx
Total amount of gDNA (Human + Mouse) = 100 ng/uL in each standard								⍺(y intercept)=	15.564
qPCR was performed for duplicate samples in one run, and the mean CT values were plotted.								β(slope)=	-2.3482

## Sheet: Calculations
Xenograft cells	Mouse ID	Cт mean	DNA conc (ng)	Calculated # of human cells
	1 NN	11.3033	65.2284	10871.4
	1 LN	12.6079	18.1497	3024.96
Control	1 RN	10.5684	134.091	22348.5
OVCAR8	1 BN	10.0228	228.967	38161.2
	2 NN	31.5384	1.57467e-07	2.62445e-05
	2 LN	11.557	50.8658	8477.64
	2 RN	18.1462	0.0794998	13.25
	2 BN	17.1732	0.2064	34.4
	3 NN	13.7233	6.07981	1013.3
UNC5 KO	3 LN	33.0492	3.57918e-08	5.9653e-06
	3 RN	19.7313	0.0168	2.8
	3 BN	33.0492	3.57918e-08	5.9653e-06
*1NN--> Cage 1 No Notch mouse gDNA (average of two technical replicates)
*Each diploid human cell contains ~6pg genomic DNA

## Sheet: Statistics
Dunnett's multiple comparisons test	Mean Diff.	95.00% CI of diff.	Below threshold?	Summary	Adjusted P Value
OVCAR8-EV vs. UNC5 KO	13637	3156 to 24117	Yes	**	0.0096
