# Supplementary material for: Netrin signaling mediates survival of dormant epithelial ovarian cancer cells
Source: eLife. 2024 Jul 18;12:RP91766. doi: 10.7554/eLife.91766 (PMC11257678; doi:10.7554/eLife.91766)
Supplement: Figure 6—source data 4. [file elife-91766-fig6-data4.xlsx]

## Sheet: Sheet1
Mouse IDs	Days Elapsed	OVCAR8-EV Control	UNC5 4KO
1.02.23.22_A No Notch	44	1
2.02.23.22_A Left Notch	69	1
3.02.23.22_A Right Notch	47	1
4.02.23.22_A Both Notches	50	1
5.02.23.22_B No Notch	60	1
6.02.23.22_B Left Notch	47	1
7.02.23.22_B Right Notch	61	1
8.02.23.22_B Both Notches	61	1
9.02.23.22_C No Notch	70		1
10.02.23.22_C Left Notch	71		1
11.02.23.22_C Right Notch	77		1
12.02.23.22_C Both Notches	69		1
13.02.23.22_D No Notch	79		1
14.02.23.22_D Left Notch	72		1
15.02.23.22_D Right Notch	75		1
16.02.23.22_D Both Notches	71		1
value is "1" when the subject died at the specified time
