# Supplementary material for: Netrin signaling mediates survival of dormant epithelial ovarian cancer cells
Source: eLife. 2024 Jul 18;12:RP91766. doi: 10.7554/eLife.91766 (PMC11257678; doi:10.7554/eLife.91766)
Supplement: Figure 7—source data 3. [file elife-91766-fig7-data3.xlsx]

## Sheet: Sheet1
	Con	Con	Con	Con	NTN1	NTN1	NTN1	NTN1	NTN3	NTN3	NTN3	NTN3		Con	Con	Con	NTN1	NTN1	NTN1	NTN3	NTN3	NTN3
1	0.336712	0.4635	0.365719	0.433957	0.515894	0.557061	0.500855	0.472949	0.534743	0.700396	0.539499	0.618121	1	0.34769	0.349369	0.300057	0.469747	0.422337	0.42823	0.750622	0.635764	0.717389
2	0.314888	0.461453	0.361973	0.433605	0.486604	0.581897	0.487418	0.475442	0.52674	0.700734	0.530367	0.629642	2	0.330923	0.345475	0.298028	0.473788	0.424746	0.429662	0.747155	0.624652	0.719716
3	0.355014	0.468967	0.371889	0.466068	0.514591	0.575362	0.484041	0.50296	0.521031	0.694846	0.53081	0.624915	3	0.35146	0.348607	0.305911	0.473879	0.427347	0.435086	0.749605	0.6205	0.752257
Average	0.335538	0.46464	0.366527	0.444543	0.505696	0.57144	0.490771	0.483783	0.527505	0.698659	0.533559	0.624226	Average	0.343358	0.347817	0.301332	0.472471	0.42481	0.430993	0.749127	0.626972	0.729788
Normalize Relative Expression	Con								NTN1								NTN3
	0.915454	1.26768	1	1.21285	0.936787	0.948954	0.822129		1.3797	1.55907	1.31991	1.33898	1.28905	1.15901	1.17588		1.4392	1.90616	1.45571	1.70308	2.04385	1.71057	1.99109
