# Supplementary material for: Netrin signaling mediates survival of dormant epithelial ovarian cancer cells
Source: eLife. 2024 Jul 18;12:RP91766. doi: 10.7554/eLife.91766 (PMC11257678; doi:10.7554/eLife.91766)
Supplement: Figure 8—source data 1. [file elife-91766-fig8-data1.xlsx]

## Sheet: Sheet1
Mouse Genotype	Mouse ID	IP injected cells	Hepatic	Mesenteric	Diaphragmatic
♀ NOD/SCID	1.01.18.23_A_NN	4x10^6 OVCAR8 tdTomato Control	0	0	1
♀ NOD/SCID	2.01.18.23_A_LN	4x10^6 OVCAR8 tdTomato Control	0	0	0
♀ NOD/SCID	3.01.18.23_A_RN	4x10^6 OVCAR8 tdTomato Control	0	0	0
♀ NOD/SCID	4.01.18.23_B_LN	4x10^6 OVCAR8 tdTomato Control	2	0	0
♀ NOD/SCID	5.01.18.23_B_RN	4x10^6 OVCAR8 tdTomato Control	0	0	1
♀ NOD/SCID	6.01.18.23_B_NN	4x10^6 OVCAR8 NTN1 OE	3	0	3
♀ NOD/SCID	7.01.18.23_C_NN	4x10^6 OVCAR8 NTN1 OE	3	0	3
♀ NOD/SCID	8.01.18.23_C_LN	4x10^6 OVCAR8 NTN1 OE	5	3	2
♀ NOD/SCID	9.01.18.23_C_RN	4x10^6 OVCAR8 NTN1 OE	5	3	1
♀ NOD/SCID	10.01.18.23_D_NN	4x10^6 OVCAR8 NTN1 OE	4	5	5
♀ NOD/SCID	1.05.10.23_A_NN	4x10^6 OVCAR8 NTN1 OE	4	1	0
♀ NOD/SCID	2.05.10.23_A_LN	4x10^6 OVCAR8 NTN1 OE	3	6	0
♀ NOD/SCID	3.05.10.23_A_RN	4x10^6 OVCAR8 NTN1 OE	5	6	3
♀ NOD/SCID	4.05.10.23_A_BN	4x10^6 OVCAR8 NTN1 OE	4	7	2
♀ NOD/SCID	5.05.10.23_B_LN	4x10^6 OVCAR8 NTN1 OE	3	2	7
♀ NOD/SCID	11.01.18.23_D_LN	4x10^6 OVCAR8 NTN3 OE	4	3	3
♀ NOD/SCID	12.01.18.23_D_RN	4x10^6 OVCAR8 NTN3 OE	3	1	2
♀ NOD/SCID	13.01.18.23_E_NN	4x10^6 OVCAR8 NTN3 OE	2	2	1
♀ NOD/SCID	14.01.18.23_E_LN	4x10^6 OVCAR8 NTN3 OE	6	0	1
♀ NOD/SCID	15.01.18.23_E_RN	4x10^6 OVCAR8 NTN3 OE	1	4	2
♀ NOD/SCID	6.05.10.23_B_NN	4x10^6 OVCAR8 NTN3 OE	9	6	3
♀ NOD/SCID	7.05.10.23_B_RN	4x10^6 OVCAR8 NTN3 OE	5	7	1
♀ NOD/SCID	8.05.10.23_B_BN	4x10^6 OVCAR8 NTN3 OE	7	7	3
♀ NOD/SCID	9.05.10.23_C_NN	4x10^6 OVCAR8 NTN3 OE	5	6	1
♀ NOD/SCID	10.05.10.23_C_LN	4x10^6 OVCAR8 NTN3 OE	6	8	1
